# Supplementary material for: The ruthenium-catalyzed C–H functionalization of enamides with isocyanates: easy entry to pyrimidin-4-ones
Source: Royal Society of Chemistry journal article supplement (doi:10.1039/c9cc03612a), 2019-01-01
Supplement: c9cc03612a1.pdf [file c9cc03612a1.pdf]

*Electronic Supplementary Information*

**The ruthenium-catalyzed C–H functionalization of enamides with  
isocyanates: easy entry to pyrimidin-4-ones**

Pengfei Shi,<sup>a</sup> Song Li,<sup>a</sup> Lu-Min Hu,<sup>a</sup> Cong Wang,<sup>a</sup> Teck-Peng Loh<sup>\*ab</sup> and Xu-Hong Hu<sup>\*a</sup>

<sup>a</sup> Institute of Advanced Synthesis, School of Chemistry and Molecular Engineering, Nanjing Tech University, Nanjing 211816, China. *E-mail: ias\_xhhu@njtech.edu.cn*

<sup>b</sup> Division of Chemistry and Biological Chemistry, School of Physical and Mathematical Sciences, Nanyang Technological University, Singapore 637371, Singapore. *E-mail: teckpeng@ntu.edu.sg*

**Table of Contents**

|                                                                       |     |
|-----------------------------------------------------------------------|-----|
| 1. General information                                                | S2  |
| 2. Experimental sections                                              | S3  |
| 2.1 General procedures for the synthesis of enamides <b>1</b>         | S3  |
| 2.2 Typical procedures for the synthesis of pyrimidin-4-ones <b>3</b> | S4  |
| 2.3 Large scale synthesis of <b>3ah</b>                               | S4  |
| 2.4 Procedure for the synthesis of <b>3ar</b>                         | S5  |
| 2.5 Mechanistic experiments                                           | S5  |
| 2.5.1 Olefinic H/D exchange of enamide <b>1n</b>                      | S5  |
| 2.5.2 Competitive deuteration experiment                              | S7  |
| 2.6 NMR data of the products                                          | S8  |
| 3. References                                                         | S24 |
| 4. NMR spectra of the products                                        | S25 |

## 1. General information

Unless otherwise noted, all reagents and solvents were purchased from commercial suppliers and used without further purification.

Thin layer chromatography was used to monitor the reaction on Merck 60 F254 precoated silica gel plate (0.2 mm thickness). TLC spots were visualized by UV-light irradiation on Spectroline Model ENF-24061/F 254 nm. Other visualization method was staining with a basic solution of potassium permanganate, followed by heating.

Flash chromatography was performed using 200-300 mesh silica gel with the indicated solvent system.

$^1\text{H}$  NMR and  $^{13}\text{C}$  NMR spectra were recorded at 25 °C on Bruker Advance 400M Hz NMR and JEOL 400M Hz spectrometers ( $\text{CDCl}_3$  as solvent). Chemical shifts for  $^1\text{H}$  NMR spectra are reported as  $\delta$  in units of parts per million (ppm) downfield from  $\text{SiMe}_4$  ( $\delta$  0.0) and relative to the signal of  $\text{SiMe}_4$  ( $\delta$  0.00 singlet). Multiplicities were given as: s (singlet); d (doublet); t (triplet); q (quartet); dd (doublet of doublets); dt (doublet of triplets); m (multiplet); brs (broad single) and etc. Coupling constants are reported as a  $J$  value in Hz.  $^{13}\text{C}$  NMR spectra are reported as  $\delta$  in units of parts per million (ppm) downfield from  $\text{SiMe}_4$  ( $\delta$  0.0) and relative to the signal of chloroform-d ( $\delta$  77 triplet). High resolution mass spectral analysis (HRMS) was performed on Waters-XEVOG2Q-TOF (Waters Corporation). Enantioselectivities were determined by HPLC analysis (Agilent 1260 infinity II) employing a Daicel Chiralcel IA column at 30 °C. Optical rotations were measured in  $\text{CHCl}_3$  on a Rudolph Research Analytical polarimeter (Autopol III) with a 1 cm cell ( $c$  given in g/100 mL).

## 2. Experimental sections

### 2.1 General procedures for the synthesis of enamides **1**

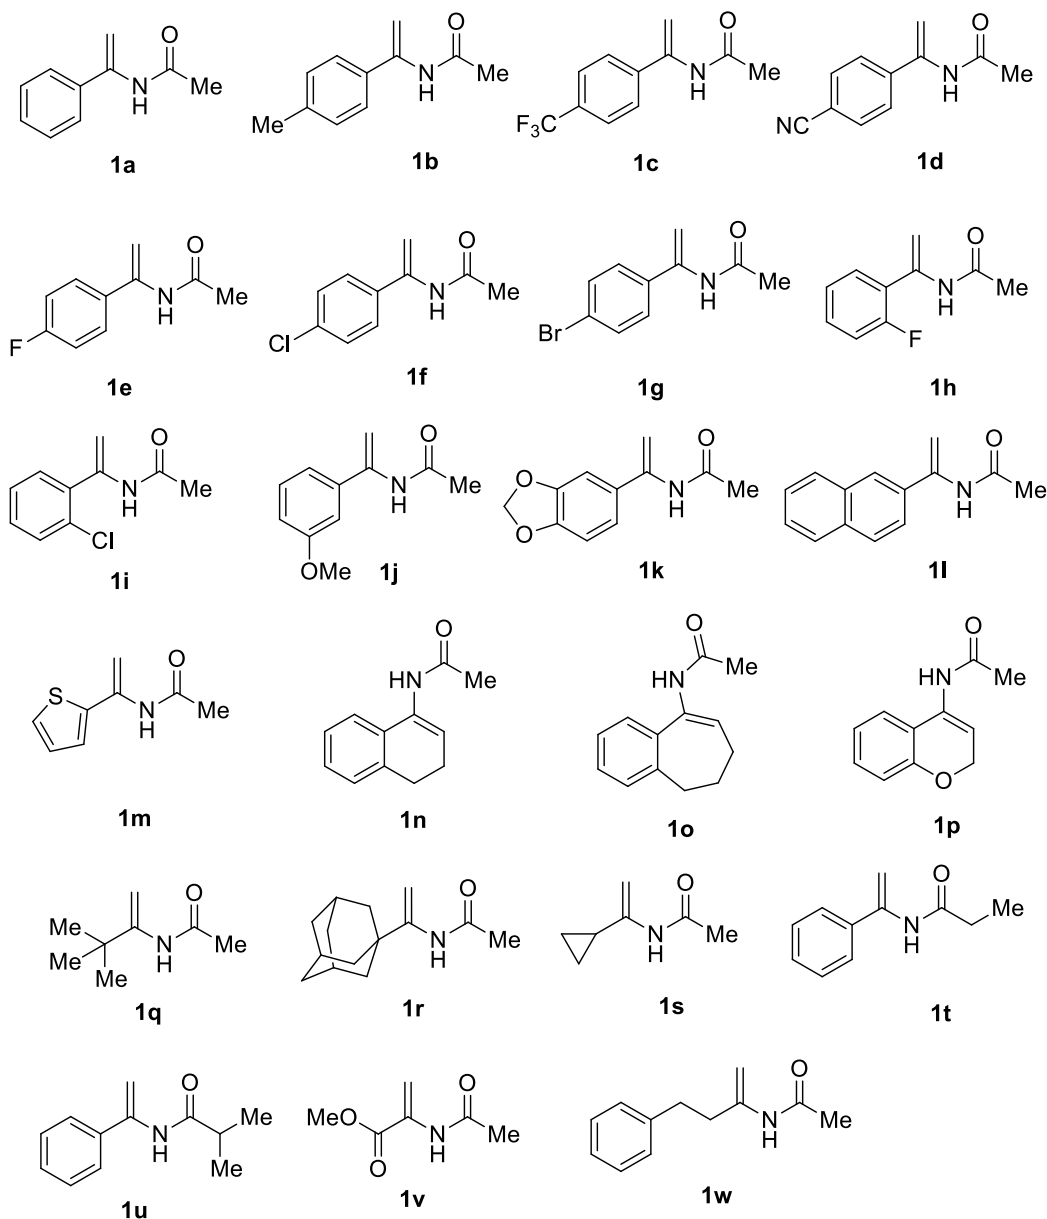

Compounds **1a–u**,<sup>1,2</sup> **1v**,<sup>3</sup> and **1w**<sup>4</sup> were prepared according to the reported literatures.

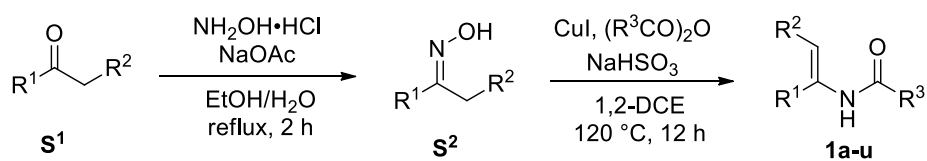

To a solution of ketone **S<sup>1</sup>** (10 mmol, 1.0 equiv) in EtOH-H<sub>2</sub>O (7.5/22.5 mL) was added hydroxylamine hydrochloride (1.04 g, 15 mmol, 1.5 equiv) and NaOAc (2.05 g, 25 mmol, 2.5



A 100 mL sealed Schlenk tube was charged with **1a** (1.41 g, 8.75 mmol, 2.5 equiv), **2h** (0.69 g, 3.5 mmol, 1.0 equiv),  $[\text{RuCl}_2(p\text{-cymene})]_2$  (107.2 mg, 0.175 mmol, 5 mol%),  $\text{AgSbF}_6$  (240.5 mg, 0.7 mmol, 20 mol%),  $\text{MesCO}_2\text{H}$  (0.86 g, 5.25 mmol, 1.5 equiv) and THF (24 mL). The vial was charged with nitrogen and placed into preheated oil bath at 100 °C with stirring for 16 h. After cooling down, saturated  $\text{NaHCO}_3$  (25 mL) was added and the mixture was extracted with DCM (25 mL  $\times$  3). The organic layers were combined, dried over  $\text{Na}_2\text{SO}_4$  and evaporated in vacuo. The resultant residue was purified by flash chromatography (PE/EtOAc) to yield **3ah** (0.99 g, 2.9 mmol, 83%).

## 2.4 Procedure for the synthesis of **3ar**

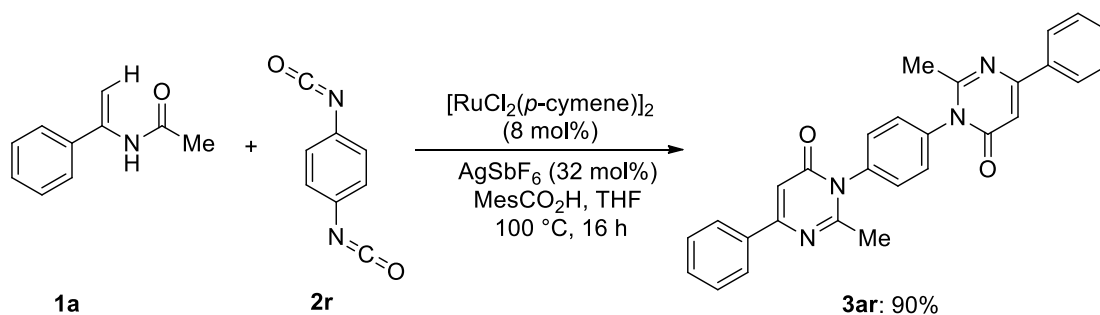

A 4 mL screw-cap vial was charged with **1a** (241.8 mg, 1.5 mmol, 5.0 equiv), **2r** (48.0 mg, 0.30 mmol, 1.0 equiv),  $[\text{RuCl}_2(p\text{-cymene})]_2$  (14.7 mg, 0.024 mmol, 8 mol%),  $\text{AgSbF}_6$  (33.0 mg, 0.096 mmol, 32 mol%),  $\text{MesCO}_2\text{H}$  (73.9 mg, 0.45 mmol, 1.5 equiv) and THF (2.0 mL). The vial was carefully blown with nitrogen for 30 seconds and placed into preheated oil bath at 100 °C with stirring for 16 h. After cooling down, sat.  $\text{NaHCO}_3$  (10 mL) was added and the mixture was extracted with DCM (10 mL  $\times$  3). The organic layers were combined, dried over  $\text{Na}_2\text{SO}_4$  and evaporated in vacuo. The resultant residue was purified by flash chromatography (PE/EtOAc) to yield **3ar** (120.0 mg, 0.269 mmol, 90%).

## 2.5 Mechanistic experiments

### 2.5.1 Olefinic H/D exchange of enamide **1n**

#### 2,4,6-Trimethylbenzoic acid- $d_1$

2,4,6-Trimethylbenzoic acid (328.4 mg, 2 mmol) was dissolved in methanol- $d_4$  (0.8 mL,

99% D), and refluxed for 1 h with stirring. The methanol was removed under reduced pressure. This cycle was repeated for 10 times to give MesCO<sub>2</sub>D as a white solid (210.6 mg, 64%, 78% D).

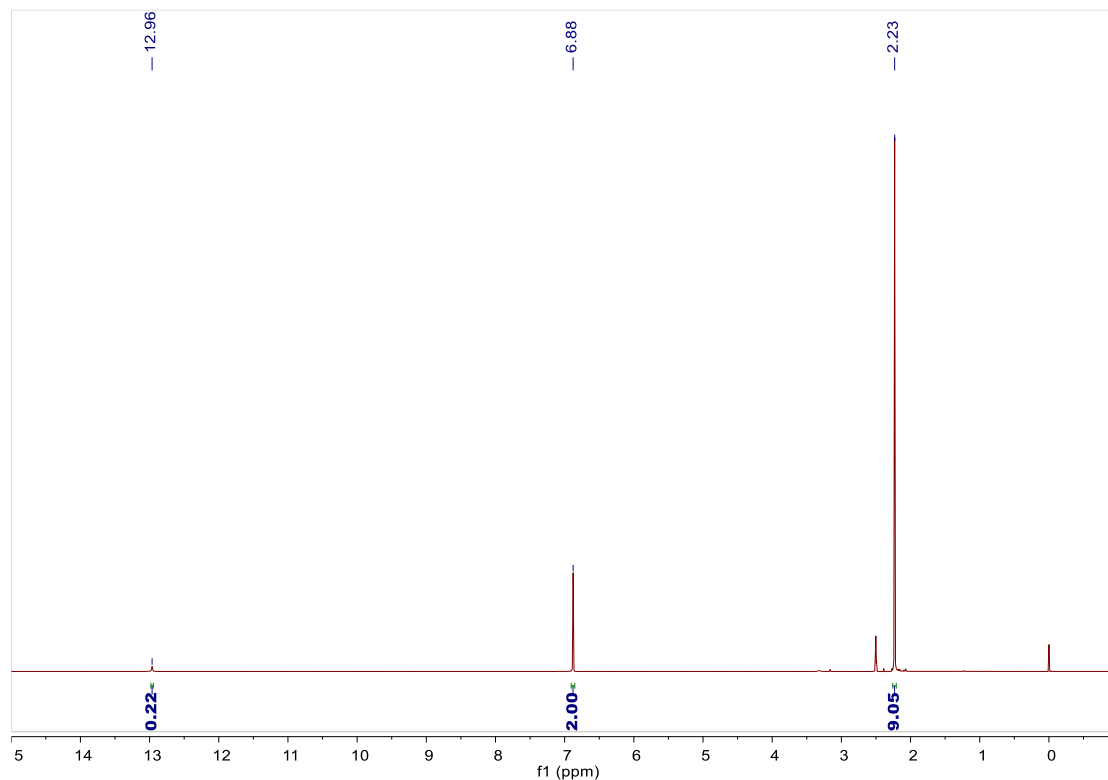

<sup>1</sup>H NMR spectrum for MesCO<sub>2</sub>D (DMSO-*d*<sub>6</sub>)

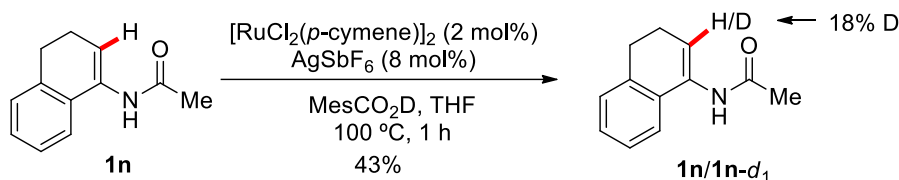

A 4 mL screw-cap vial was charged with **1n** (70.2 mg, 0.375 mmol, 1.0 equiv), [RuCl<sub>2</sub>(*p*-cymene)]<sub>2</sub> (4.6 mg, 0.0075 mmol, 2 mol%), AgSbF<sub>6</sub> (10.3 mg, 0.03 mmol, 8 mol%), MesCO<sub>2</sub>D (78% D, 37.0 mg, 0.225 mmol) and THF (1.0 mL). The vial was carefully blown with nitrogen for 30 seconds and placed into preheated oil bath at 100 °C with stirring for 1 h. After cooling down, sat. NaHCO<sub>3</sub> (10 mL) was added and the mixture was extracted with DCM (10 mL × 3). The organic layers were combined, dried over Na<sub>2</sub>SO<sub>4</sub> and evaporated in vacuo. The resultant residue was purified by flash chromatography (PE/EtOAc) to yield the enamide **1n/1n-*d*<sub>1</sub>** (29.9 mg, 43%). The ratio of **1n-*d*<sub>1</sub>** was determined by <sup>1</sup>H NMR (400 MHz, CDCl<sub>3</sub>) to be 18%.

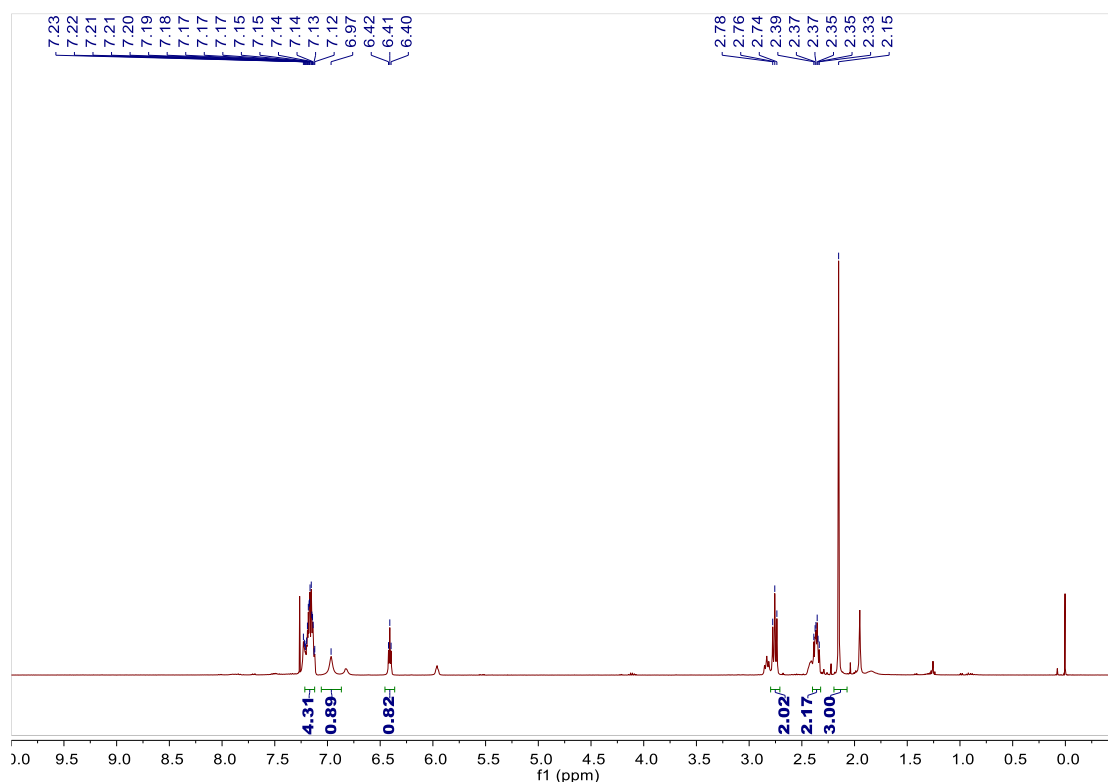

$^1\text{H}$  NMR spectrum for **1n/1n- $d_1$**

### 2.5.2 Competitive deuteration experiment

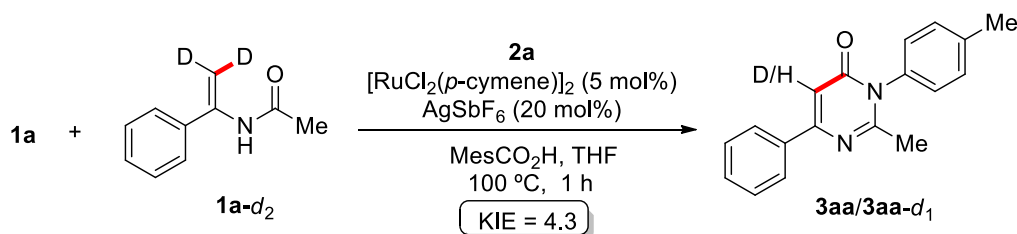

A 4 mL screw-cap vial was charged with **1a** (6.5 mg, 0.04 mmol), **1a- $d_2$**  (62% D, 25 mg, 0.15 mmol),<sup>5</sup> **2a** (25.3 mg, 0.19 mmol, 1.0 equiv),  $[\text{RuCl}_2(p\text{-cymene})]_2$  (5.4 mg, 0.0095 mmol, 5 mol%),  $\text{AgSbF}_6$  (13.1 mg, 0.038 mmol, 20 mol%),  $\text{MesCO}_2\text{H}$  (46.8 mg, 0.285 mmol, 1.5 equiv) and THF (1.3 mL). The vial was carefully blown with nitrogen for 30 seconds and placed into preheated oil bath at 100 °C with stirring for 1 h. After cooling down, sat.  $\text{NaHCO}_3$  (10 mL) was added and the mixture was extracted with DCM (10 mL  $\times$  3). The organic layers were combined, dried over  $\text{Na}_2\text{SO}_4$  and evaporated in vacuo. The resultant residue was purified by flash chromatography (PE/EtOAc) to yield **3aa/3aa- $d_1$**  (17.3 mg, 33%). The ratio of **3aa/3aa- $d_1$**  was determined by  $^1\text{H}$  NMR (400 MHz,  $\text{CDCl}_3$ ) to be 4.3:1.

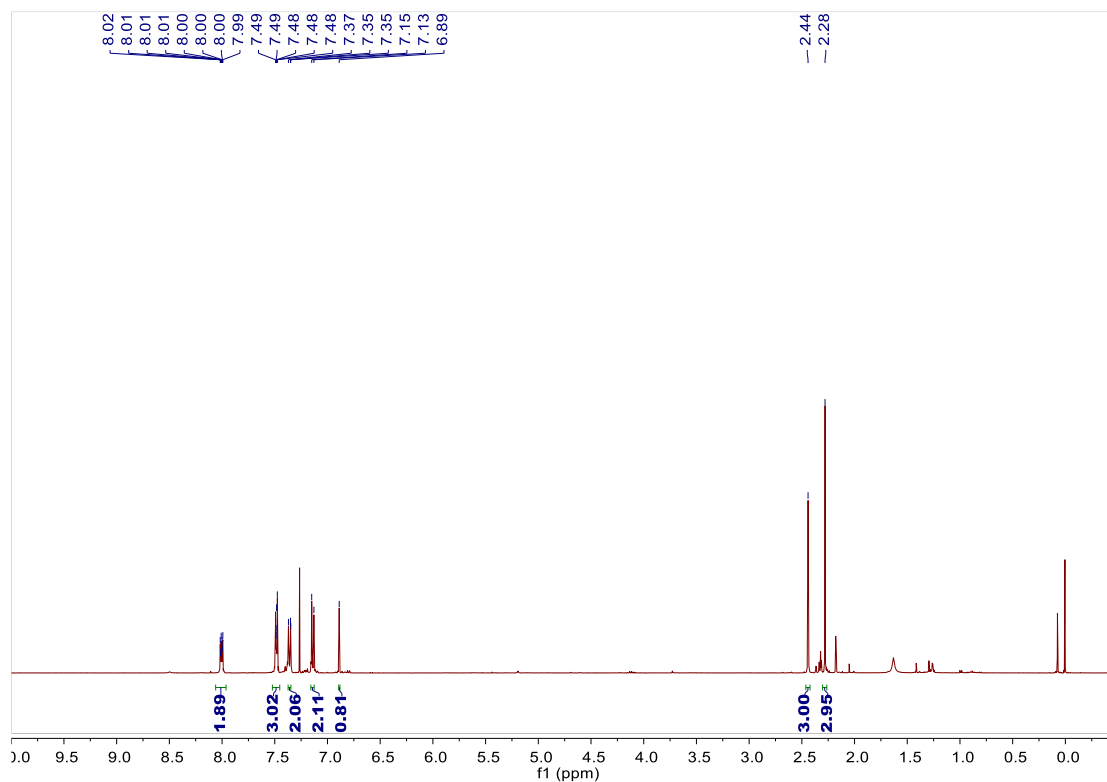

<sup>1</sup>H NMR spectrum for 3aa/3aa-d<sub>1</sub>

## 2.6 NMR data of the products

### 2-Methyl-6-phenyl-3-(*p*-tolyl)pyrimidin-4(3*H*)-one (3aa)

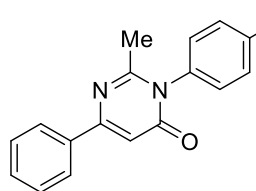

Following typical procedure, **3aa** was obtained as a white solid (68.8 mg, 0.249 mmol, 83%). mp: 120.5 – 120.7 °C. <sup>1</sup>H NMR (400 MHz, Chloroform-*d*): δ 8.04 – 7.98 (m, 2H), 7.51 – 7.46 (m, 3H), 7.39 – 7.34 (m, 2H), 7.14 (d, *J* = 8.3 Hz, 2H), 6.89 (s, 1H), 2.44 (s, 3H), 2.28 (s, 3H). <sup>13</sup>C NMR (101 MHz, Chloroform-*d*): δ 163.34, 160.12, 159.10, 139.46, 136.35, 134.64, 130.70 × 2, 130.48, 128.72 × 2, 127.11 × 2, 126.95 × 2, 107.64, 24.26, 21.22. HRMS (ESI): *m/z* calculated for C<sub>18</sub>H<sub>17</sub>N<sub>2</sub>O [M + H]<sup>+</sup>: 277.1341, found: 277.1342.

### 2-Methyl-3,6-di-*p*-tolylpyrimidin-4(3*H*)-one (3ba)

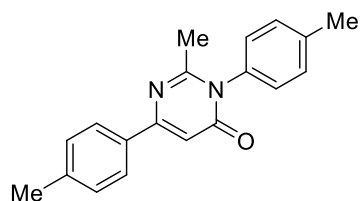

Following typical procedure, **3ba** was obtained as a white solid (43.4 mg, 0.149 mmol, 50%). mp: 192.7 – 193.0 °C. <sup>1</sup>H NMR (400 MHz, Chloroform-*d*): δ 7.91 (d, *J* = 8.2 Hz, 2H), 7.40 – 7.34 (m, 2H), 7.31 – 7.26 (m, 2H), 7.14 (d, *J* = 8.3 Hz,



2H), 6.86 (s, 1H), 2.44 (s, 3H), 2.42 (s, 3H), 2.27 (s, 3H).  $^{13}\text{C}$  NMR (101 MHz, Chloroform-*d*):  $\delta$  163.40, 160.08, 158.92, 140.83, 139.40, 134.73, 133.53, 130.68  $\times$  2, 129.46  $\times$  2, 127.15  $\times$  2, 126.89  $\times$  2, 106.94, 24.26, 21.39, 21.22. HRMS (ESI):  $m/z$  calculated for  $\text{C}_{19}\text{H}_{19}\text{N}_2\text{O}$   $[\text{M} + \text{H}]^+$ : 291.1497, found: 291.1496.

#### 2-Methyl-3-(*p*-tolyl)-6-(4-(trifluoromethyl)phenyl)pyrimidin-4(3*H*)-one (3ca)

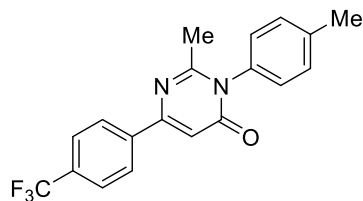

Following typical procedure, **3ca** was obtained as a white solid (85.5 mg, 0.248 mmol, 83%). mp: 174.3 – 175.1 °C.  $^1\text{H}$  NMR (400 MHz, Chloroform-*d*):  $\delta$  8.14 – 8.08 (m, 2H), 7.78 – 7.69 (m, 2H), 7.41 – 7.34 (m, 2H), 7.14 (d,  $J$  = 8.3 Hz, 2H), 6.92 (s, 1H), 2.45 (s, 3H), 2.29 (s, 3H).  $^{13}\text{C}$  NMR (101 MHz, Chloroform-*d*):  $\delta$  163.05, 159.61, 158.53, 139.77, 139.65, 134.43, 132.07 ( $q$ ,  $J$  = 32.6 Hz), 130.78  $\times$  2, 127.29  $\times$  2, 127.02  $\times$  2, 125.65  $\times$  2 ( $q$ ,  $J$  = 3.7 Hz), 123.89 ( $q$ ,  $J$  = 272.3 Hz), 108.74, 24.25, 21.22.  $^{19}\text{F}$  NMR (376 MHz, Chloroform-*d*):  $\delta$  -62.77. HRMS (ESI):  $m/z$  calculated for  $\text{C}_{19}\text{H}_{16}\text{F}_3\text{N}_2\text{O}$   $[\text{M} + \text{H}]^+$ : 345.1215, found: 345.1209.

#### 4-(2-Methyl-6-oxo-1-(*p*-tolyl)-1,6-dihydropyrimidin-4-yl)benzonitrile (3da)

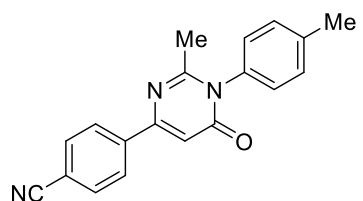

Following typical procedure, **3da** was obtained as a yellow solid (63.3 mg, 0.210 mmol, 70%). mp: 237.2 – 239.9 °C.  $^1\text{H}$  NMR (400 MHz, Chloroform-*d*):  $\delta$  8.14 – 8.07 (m, 2H), 7.81 – 7.71 (m, 2H), 7.37 (d,  $J$  = 8.2 Hz, 2H), 7.17 – 7.08 (m, 2H), 6.91 (s, 1H), 2.44 (s, 3H), 2.28 (s, 3H).  $^{13}\text{C}$  NMR (101 MHz, Chloroform-*d*):  $\delta$  162.91, 159.82, 157.87, 140.56, 139.74, 134.30, 132.47  $\times$  2, 130.81  $\times$  2, 127.51  $\times$  2, 126.97  $\times$  2, 118.43, 113.80, 109.15, 24.26, 21.23. HRMS (ESI):  $m/z$  calculated for  $\text{C}_{19}\text{H}_{16}\text{N}_3\text{O}$   $[\text{M} + \text{H}]^+$ : 302.1293, found: 302.1290.

#### 6-(4-Fluorophenyl)-2-methyl-3-(*p*-tolyl)pyrimidin-4(3*H*)-one (3ea)

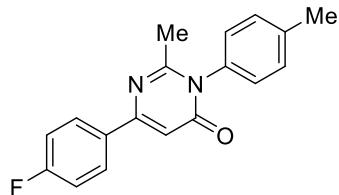

Following typical procedure, **3ea** was obtained as a white solid (85.9 mg, 0.292 mmol, 97%). mp: 174.1 – 176.9 °C. <sup>1</sup>H NMR (400 MHz, Chloroform-*d*): δ 8.01 (dd, *J* = 8.9, 5.4 Hz, 2H), 7.40 – 7.33 (m, 2H), 7.19 – 7.09 (m, 4H), 6.83 (s, 1H), 2.44 (s, 3H), 2.26 (s, 3H). <sup>13</sup>C NMR (101 MHz, Chloroform-*d*): δ 164.27 (d, *J* = 251.0 Hz), 163.23, 159.19, 158.99, 139.50, 134.51, 132.41 (d, *J* = 3.3 Hz), 130.70 × 2, 129.00 × 2 (d, *J* = 8.7 Hz), 127.06 × 2, 115.72 × 2 (d, *J* = 21.7 Hz), 107.19, 24.21, 21.20. <sup>19</sup>F NMR (376 MHz, Chloroform-*d*): δ -109.93. HRMS (ESI): *m/z* calculated for C<sub>18</sub>H<sub>16</sub>FN<sub>2</sub>O [M + H]<sup>+</sup>: 295.1247, found: 295.1245.

#### 6-(4-Chlorophenyl)-2-methyl-3-(*p*-tolyl)pyrimidin-4(3*H*)-one (**3fa**)

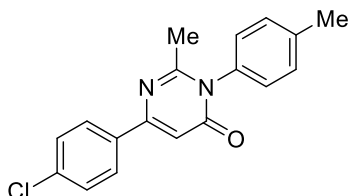

Following typical procedure, **3fa** was obtained as a white solid (91.7 mg, 0.295 mmol, 98%). mp: 191.0 – 192.2 °C. <sup>1</sup>H NMR (400 MHz, Chloroform-*d*): δ 7.95 (d, *J* = 8.5 Hz, 2H), 7.45 (d, *J* = 8.6 Hz, 2H), 7.36 (dt, *J* = 8.5, 0.7 Hz, 2H), 7.13 (d, *J* = 8.2 Hz, 2H), 6.85 (s, 1H), 2.44 (s, 3H), 2.27 (s, 3H). <sup>13</sup>C NMR (101 MHz, Chloroform-*d*): δ 163.21, 159.32, 158.87, 139.58, 136.68, 134.77, 134.52, 130.76 × 2, 128.96 × 2, 128.28 × 2, 127.07 × 2, 107.60, 24.26, 21.24. HRMS (ESI): *m/z* calculated for C<sub>18</sub>H<sub>16</sub><sup>35</sup>ClN<sub>2</sub>O [M + H]<sup>+</sup>: 311.0951, found: 311.0944.

#### 6-(4-Bromophenyl)-2-methyl-3-(*p*-tolyl)pyrimidin-4(3*H*)-one (**3ga**)

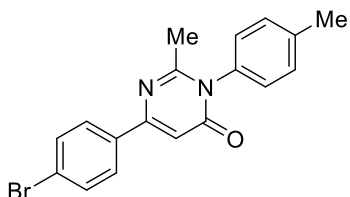

Following typical procedure, **3ga** was obtained as a white solid (63.8 mg, 0.180 mmol, 60 %). mp: 188.3 – 188.9 °C. <sup>1</sup>H NMR (400 MHz, Chloroform-*d*): δ 7.88 (d, *J* = 8.6 Hz, 2H), 7.60 (d, *J* = 8.7 Hz, 2H), 7.36 (d, *J* = 7.9 Hz, 2H), 7.13 (d, *J* = 8.3 Hz, 2H), 6.85 (s, 1H), 2.44 (s, 3H), 2.26 (s, 3H). <sup>13</sup>C NMR (101 MHz, Chloroform-*d*): δ 163.14, 159.31, 158.88, 139.53, 135.21, 134.49, 131.89 × 2, 130.72 × 2, 128.48 × 2, 127.04 × 2, 125.09, 107.57, 24.24, 21.22. HRMS (ESI): *m/z* calculated for C<sub>18</sub>H<sub>16</sub><sup>79</sup>BrN<sub>2</sub>O [M + H]<sup>+</sup>: 355.0446, found: 355.0439.

#### 6-(2-Fluorophenyl)-2-methyl-3-(*p*-tolyl)pyrimidin-4(3*H*)-one (**3ha**)

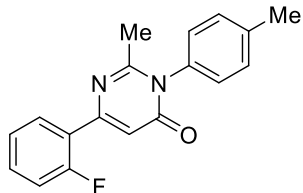

Following typical procedure, **3ha** was obtained as a yellow solid (47.4 mg, 0.161 mmol, 54%). mp: 193.6 – 193.9 °C. <sup>1</sup>H NMR (400 MHz, Chloroform-*d*):  $\delta$  8.09 (td,  $J$  = 7.9, 2.0 Hz, 1H), 7.46 – 7.38 (m, 1H), 7.36 (d,  $J$  = 8.0 Hz, 2H), 7.30 – 7.24 (m, 1H), 7.16 – 7.13 (m, 3H), 7.03 (s, 1H), 2.43 (s, 3H), 2.26 (s, 3H). <sup>13</sup>C NMR (101 MHz, Chloroform-*d*):  $\delta$  163.04 (d,  $J$  = 1.5 Hz), 161.03 (d,  $J$  = 253.4 Hz), 158.92, 155.55 (d,  $J$  = 2.7 Hz), 139.52, 134.56, 131.66 (d,  $J$  = 8.9 Hz), 130.73  $\times$  2, 130.53 (d,  $J$  = 2.5 Hz), 127.09  $\times$  2, 124.60 (d,  $J$  = 10.5 Hz), 124.33 (d,  $J$  = 3.8 Hz), 116.43 (d,  $J$  = 23.1 Hz), 112.69 (d,  $J$  = 12.4 Hz), 24.20, 21.22. <sup>19</sup>F NMR (376 MHz, Chloroform-*d*):  $\delta$  -113.04. HRMS (ESI):  $m/z$  calculated for C<sub>18</sub>H<sub>16</sub>FN<sub>2</sub>O [M + H]<sup>+</sup>: 295.1247, found: 295.1248.

#### 6-(2-Chlorophenyl)-2-methyl-3-(*p*-tolyl)pyrimidin-4(3H)-one (**3ia**)

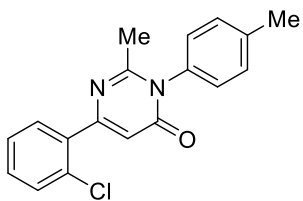

Following typical procedure, **3ia** was obtained as a purple solid (33.2 mg, 0.107 mmol, 36%). mp: 248.3 – 248.6 °C. <sup>1</sup>H NMR (400 MHz, Chloroform-*d*):  $\delta$  7.67 – 7.62 (m, 1H), 7.53 – 7.46 (m, 1H), 7.41 – 7.33 (m, 4H), 7.17 (d,  $J$  = 8.2 Hz, 2H), 6.79 (s, 1H), 2.45 (s, 3H), 2.26 (s, 3H). <sup>13</sup>C NMR (101 MHz, Chloroform-*d*):  $\delta$  162.59, 159.73, 159.30, 139.59, 136.56, 134.49, 132.12, 130.75  $\times$  2, 130.58, 130.45, 130.38, 127.06  $\times$  2, 126.95, 113.42, 24.17, 21.24. HRMS (ESI):  $m/z$  calculated for C<sub>18</sub>H<sub>16</sub><sup>35</sup>ClN<sub>2</sub>O [M + H]<sup>+</sup>: 311.0951, found: 311.0944.

#### 6-(3-Methoxyphenyl)-2-methyl-3-(*p*-tolyl)pyrimidin-4(3H)-one (**3ja**)

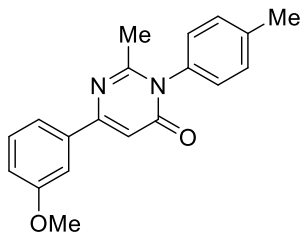

Following typical procedure, **3ja** was obtained as a white solid (49.0 mg, 0.160 mmol, 53%). mp: 171.4 – 171.7 °C. <sup>1</sup>H NMR (400 MHz, Chloroform-*d*):  $\delta$  7.57 (dt,  $J$  = 5.0, 1.8 Hz, 2H), 7.43 – 7.33 (m, 3H), 7.14 (d,  $J$  = 8.2 Hz, 2H), 7.02 (ddd,  $J$  = 8.2, 2.6, 1.0 Hz, 1H), 6.87 (s, 1H), 3.88 (s, 3H), 2.44 (s, 3H), 2.27 (s, 3H). <sup>13</sup>C NMR (101 MHz, Chloroform-*d*):  $\delta$  163.30, 159.89, 159.86, 159.02, 139.45, 137.78, 134.60, 130.69  $\times$  2, 129.73, 127.07  $\times$  2, 119.32, 116.42, 112.08, 107.81, 55.30, 24.24, 21.20. HRMS (ESI):  $m/z$  calculated for C<sub>19</sub>H<sub>19</sub>N<sub>2</sub>O<sub>2</sub> [M + H]<sup>+</sup>: 307.1447, found: 307.1444.

**6-(Benzo[d][1,3]dioxol-5-yl)-2-methyl-3-(*p*-tolyl)pyrimidin-4(3*H*)-one (3ka)**

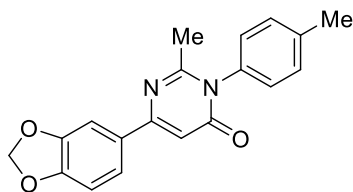

Following typical procedure, **3ka** was obtained as a yellow solid (70.9 mg, 0.221 mmol, 74%). mp: 175.4 – 176.3 °C. <sup>1</sup>H NMR (400 MHz, Chloroform-*d*): δ 7.59 (dd, *J* = 8.2, 1.8 Hz, 1H), 7.49 (d, *J* = 1.8 Hz, 1H), 7.40 – 7.32 (m, 2H), 7.12 (d, *J* = 8.3 Hz, 2H), 6.90 (d, *J* = 8.2 Hz, 1H), 6.76 (s, 1H), 6.03 (s, 2H), 2.43 (s, 3H), 2.25 (s, 3H). <sup>13</sup>C NMR (101 MHz, Chloroform-*d*): δ 163.32, 159.44, 158.79, 149.70, 148.18, 139.41, 134.67 × 2, 130.62, 130.57, 127.14 × 2, 121.72, 108.42, 107.14, 106.37, 101.51, 24.23, 21.21. HRMS (ESI): *m/z* calculated for C<sub>19</sub>H<sub>17</sub>N<sub>2</sub>O<sub>3</sub> [M + H]<sup>+</sup>: 321.1239, found: 321.1235.

**2-Methyl-6-(naphthalen-2-yl)-3-(*p*-tolyl)pyrimidin-4(3*H*)-one (3la)**

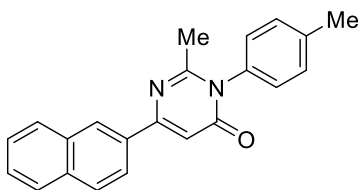

Following typical procedure, **3la** was obtained as a yellow solid (85.4 mg, 0.262 mmol, 87%). mp: 174.4 – 175.1 °C. <sup>1</sup>H NMR (400 MHz, Chloroform-*d*): δ 8.64 – 8.59 (m, 1H), 8.04 (dd, *J* = 8.6, 1.8 Hz, 1H), 8.00 – 7.85 (m, 3H), 7.58 – 7.52 (m, 2H), 7.38 (dt, *J* = 7.8, 0.7 Hz, 2H), 7.17 (d, *J* = 8.3 Hz, 2H), 7.04 (s, 1H), 2.45 (s, 3H), 2.33 (s, 3H). <sup>13</sup>C NMR (101 MHz, Chloroform-*d*): δ 163.38, 159.89, 159.10, 139.47, 134.65, 134.33, 133.52, 133.13, 130.71 × 2, 129.03, 128.48, 127.64, 127.40, 127.21, 127.14 × 2, 126.47, 123.67, 107.85, 24.28, 21.22. HRMS (ESI): *m/z* calculated for C<sub>22</sub>H<sub>19</sub>N<sub>2</sub>O [M + H]<sup>+</sup>: 327.1497, found: 327.1492.

**2-Methyl-6-(thiophen-2-yl)-3-(*p*-tolyl)pyrimidin-4(3*H*)-one (3ma)**

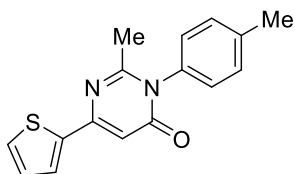

Following typical procedure, **3ma** was obtained as a purple solid (68.5 mg, 0.243 mmol, 81%). mp: 178.8 – 180.5 °C. <sup>1</sup>H NMR (400 MHz, Chloroform-*d*): δ 7.66 (dd, *J* = 3.8, 1.1 Hz, 1H), 7.50 (dd, *J* = 5.1, 1.1 Hz, 1H), 7.37 – 7.31 (m, 2H), 7.17 – 7.08 (m, 3H), 6.75 (s, 1H), 2.43 (s, 3H), 2.23 (s, 3H). <sup>13</sup>C NMR (101 MHz, Chloroform-*d*): δ 162.90, 159.41, 155.00, 141.47, 139.42, 134.52, 130.64 × 2, 129.74, 128.38, 127.09 × 2, 127.02, 104.77, 24.07, 21.17. HRMS (ESI): *m/z* calculated for C<sub>16</sub>H<sub>15</sub>N<sub>2</sub>OS [M + H]<sup>+</sup>: 283.0905, found: 283.0899.

### 2-Methyl-3-(*p*-tolyl)-5,6-dihydrobenzo[*h*]quinazolin-4(3*H*)-one (3na)

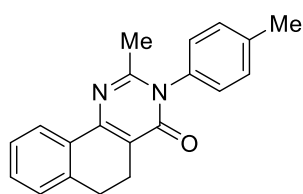

Following typical procedure, **3na** was obtained as a white solid (70.1 mg, 0.232 mmol, 77%). mp: 171.3 – 171.9 °C. <sup>1</sup>H NMR (400 MHz, Chloroform-*d*): δ 8.25 – 8.20 (m, 1H), 7.38 – 7.32 (m, 4H), 7.27 – 7.23 (m, 1H), 7.13 (d, *J* = 8.3 Hz, 2H), 2.98 – 2.91 (m, 2H), 2.87 (ddd, *J* = 9.5, 6.2, 1.9 Hz, 2H), 2.44 (s, 3H), 2.25 (s, 3H). <sup>13</sup>C NMR (101 MHz, Chloroform-*d*): δ 162.93, 156.69, 153.01, 139.22, 138.71, 135.21, 132.51, 130.59 × 2, 130.18, 127.86, 127.19 × 2, 126.83, 125.29, 117.47, 27.18, 24.18, 21.21, 19.96. HRMS (ESI): *m/z* calculated for C<sub>20</sub>H<sub>19</sub>N<sub>2</sub>O [*M* + *H*]<sup>+</sup>: 303.1497, found: 303.1492.

### 2-Methyl-3-(*p*-tolyl)-6,7-dihydro-3*H*-benzo[6,7]cyclohepta[1,2-*d*]pyrimidin-4(5*H*)-one (3oa)

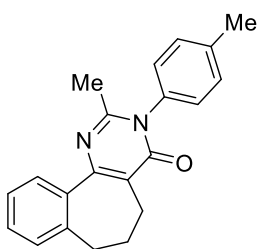

Following typical procedure, **3oa** was obtained as a yellow solid (59.4 mg, 0.188 mmol, 63%). mp: 171.6 – 172.1 °C. <sup>1</sup>H NMR (400 MHz, Chloroform-*d*): δ 7.79 – 7.70 (m, 1H), 7.43 – 7.32 (m, 4H), 7.30 – 7.25 (m, 1H), 7.19 – 7.12 (m, 2H), 2.64 (t, *J* = 7.1 Hz, 2H), 2.50 (t, *J* = 7.2 Hz, 2H), 2.43 (s, 3H), 2.30 – 2.26 (m, 2H), 2.24 (s, 3H). <sup>13</sup>C NMR (101 MHz, Chloroform-*d*): δ 163.10, 158.49, 156.50, 140.82, 139.19, 138.30, 135.30, 130.58 × 2, 129.39, 128.90, 128.02, 127.13 × 2, 126.53, 121.59, 33.37, 31.89, 24.12, 21.54, 21.19. HRMS (ESI): *m/z* calculated for C<sub>21</sub>H<sub>21</sub>N<sub>2</sub>O [*M* + *H*]<sup>+</sup>: 317.1654, found: 317.1651.

### 2-Methyl-3-(*p*-tolyl)-3*H*-chromeno[4,3-*d*]pyrimidin-4(5*H*)-one (3pa)

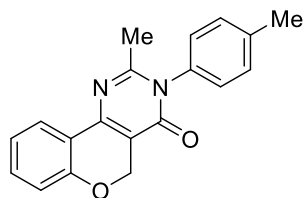

Following typical procedure, **3pa** was obtained as a white solid (81.8 mg, 0.269 mmol, 90%). mp: 224.2 – 224.9 °C. <sup>1</sup>H NMR (400 MHz, Chloroform-*d*): δ 8.06 (dd, *J* = 7.7, 1.7 Hz, 1H), 7.35 (dd, *J* = 7.7, 1.8 Hz, 3H), 7.11 (d, *J* = 8.3 Hz, 2H), 7.06 (td, *J* = 7.5, 1.1 Hz, 1H), 6.93 (dd, *J* = 8.2, 1.0 Hz, 1H), 5.24 (s, 2H), 2.44 (s, 3H), 2.25 (s, 3H). <sup>13</sup>C NMR (101 MHz, Chloroform-*d*): δ 160.06, 158.90, 156.98, 150.38, 139.48, 134.50, 132.60, 130.66 × 2, 127.08 × 2, 125.27, 121.73, 120.50, 116.73, 110.60, 63.04, 24.24, 21.19. HRMS (ESI): *m/z* calculated for C<sub>19</sub>H<sub>17</sub>N<sub>2</sub>O<sub>2</sub> [*M* + *H*]<sup>+</sup>: 305.1290, found: 305.1288.

### 6-(*tert*-Butyl)-2-methyl-3-(*p*-tolyl)pyrimidin-4(3*H*)-one (3qa)

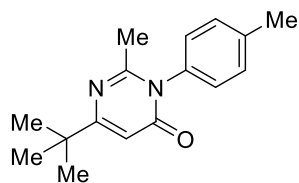

Following typical procedure, **3qa** was obtained as a white solid (49.0 mg, 0.191 mmol, 64%). mp: 101.1 – 102.0 °C. <sup>1</sup>H NMR (400 MHz, Chloroform-*d*):  $\delta$  7.36 – 7.28 (m, 2H), 7.09 (d, *J* = 8.3 Hz, 2H), 6.41 (s, 1H), 2.41 (s, 3H), 2.16 (s, 3H), 1.28 (s, 9H). <sup>13</sup>C NMR (101 MHz, Chloroform-*d*):  $\delta$  173.76, 163.66, 157.68, 139.21, 134.82, 130.61  $\times$  2, 127.09  $\times$  2, 106.95, 36.86, 28.50  $\times$  3, 24.05, 21.17. HRMS (ESI): *m/z* calculated for C<sub>16</sub>H<sub>21</sub>N<sub>2</sub>O [*M* + *H*]<sup>+</sup>: 257.1654, found: 257.1649.

### 6-(Adamantan-1-yl)-2-methyl-3-(*p*-tolyl)pyrimidin-4(3*H*)-one (3ra)

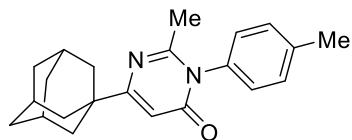

Following typical procedure, **3ra** was obtained as a white solid (80.8 mg, 0.242 mmol, 81%). mp: 210.6 – 210.9 °C. <sup>1</sup>H NMR (400 MHz, Chloroform-*d*):  $\delta$  7.36 – 7.30 (m, 2H), 7.09 (d, *J* = 8.2 Hz, 2H), 6.31 (s, 1H), 2.42 (s, 3H), 2.16 (s, 3H), 2.12 – 2.06 (m, 3H), 1.90 (d, *J* = 2.9 Hz, 6H), 1.83 – 1.71 (m, 6H). <sup>13</sup>C NMR (101 MHz, Chloroform-*d*):  $\delta$  173.36, 163.84, 157.81, 139.20, 134.93, 130.60  $\times$  2, 127.15  $\times$  2, 106.97, 40.15  $\times$  3, 38.42, 36.63  $\times$  3, 28.30  $\times$  3, 24.11, 21.21. HRMS (ESI): *m/z* calculated for C<sub>22</sub>H<sub>27</sub>N<sub>2</sub>O [*M* + *H*]<sup>+</sup>: 335.2123, found: 335.2120.

### 6-Cyclopropyl-2-methyl-3-(*p*-tolyl)pyrimidin-4(3*H*)-one (3sa)

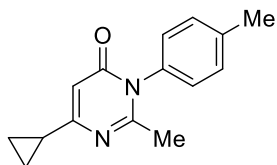

Following typical procedure, **3sa** was obtained as a yellow liquid (20.0 mg, 0.083 mmol, 28%). <sup>1</sup>H NMR (400 MHz, Chloroform-*d*):  $\delta$  7.31 (d, *J* = 8.1 Hz, 2H), 7.06 (d, *J* = 8.2 Hz, 2H), 6.29 (s, 1H), 2.41 (s, 3H), 2.11 (s, 3H), 1.83 – 1.77 (m, 1H), 1.10 – 1.03 (m, 2H), 1.00 – 0.91 (m, 2H). <sup>13</sup>C NMR (101 MHz, Chloroform-*d*):  $\delta$  167.75, 162.66, 158.86, 139.27, 134.82, 130.61  $\times$  2, 127.17  $\times$  2, 107.70, 24.03, 21.21, 16.48, 8.91  $\times$  2. HRMS (ESI): *m/z* calculated for C<sub>15</sub>H<sub>17</sub>N<sub>2</sub>O [*M* + *H*]<sup>+</sup>: 241.1341, found: 241.1328.

### 2-Ethyl-6-phenyl-3-(*p*-tolyl)pyrimidin-4(3*H*)-one (3ta)

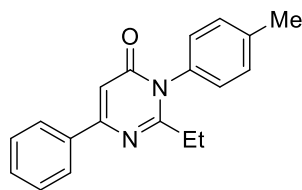

Following typical procedure, **3ta** was obtained as a brown solid (79.4 mg, 0.273 mmol, 91%). mp: 144.1 – 145.2 °C. <sup>1</sup>H NMR (400 MHz, Chloroform-*d*): δ 8.09 – 8.04 (m, 2H), 7.49 – 7.46 (m, 3H), 7.36 (d, *J* = 8.1 Hz, 2H), 7.19 – 7.09 (m, 2H), 6.92 (s, 1H), 2.49 – 2.43 (m, 5H), 1.28 (t, *J* = 7.3 Hz, 3H). <sup>13</sup>C NMR (101 MHz, Chloroform-*d*): δ 163.48, 162.29, 159.63, 139.30, 136.37, 134.05, 130.55, 130.42 × 2, 128.61 × 2, 127.31 × 2, 126.91 × 2, 107.17, 29.11, 21.17, 10.78. HRMS (ESI): *m/z* calculated for C<sub>19</sub>H<sub>19</sub>N<sub>2</sub>O [*M* + *H*]<sup>+</sup>: 291.1497, found: 291.1486.

### 2-iso-Propyl-6-phenyl-3-(*p*-tolyl)pyrimidin-4(3*H*)-one (**3ua**)

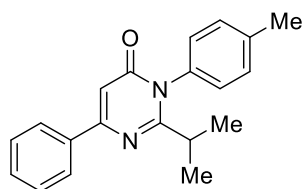

Following typical procedure, **3ua** was obtained as a brown solid (50.2 mg, 0.165 mmol, 55%). mp: 181.2 – 182.0 °C. <sup>1</sup>H NMR (400 MHz, Chloroform-*d*): δ 8.08 (dd, *J* = 6.7, 3.0 Hz, 2H), 7.49 (dd, *J* = 4.8, 1.9 Hz, 3H), 7.36 (d, *J* = 7.8 Hz, 2H), 7.14 (d, *J* = 8.2 Hz, 2H), 6.88 (s, 1H), 2.73 (p, *J* = 6.7 Hz, 1H), 2.45 (s, 3H), 1.24 (d, *J* = 6.7 Hz, 6H). <sup>13</sup>C NMR (101 MHz, Chloroform-*d*): δ 166.36, 163.71, 159.87, 139.34, 136.48, 134.15, 130.54, 130.48 × 2, 128.64 × 2, 127.48 × 2, 127.00 × 2, 106.88, 32.59, 21.29 × 2, 21.25. HRMS (ESI): *m/z* calculated for C<sub>20</sub>H<sub>21</sub>N<sub>2</sub>O [*M* + *H*]<sup>+</sup>: 305.1654, found: 305.1640.

### 3-(4-Fluorophenyl)-2-methyl-6-phenylpyrimidin-4(3*H*)-one (**3ab**)

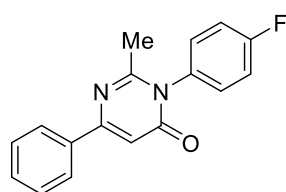

Following typical procedure, **3ab** was obtained as a white solid (77.4 mg, 0.276 mmol, 92%). mp: 175.8 – 176.2 °C. <sup>1</sup>H NMR (400 MHz, Chloroform-*d*): δ 8.04 – 7.97 (m, 2H), 7.51 – 7.45 (m, 3H), 7.25 (d, *J* = 6.4 Hz, 4H), 6.88 (s, 1H), 2.28 (s, 3H). <sup>13</sup>C NMR (101 MHz, Chloroform-*d*): δ 163.20, 162.78 (d, *J* = 249.8 Hz), 160.30, 158.78, 136.17, 133.16 (d, *J* = 3.4 Hz), 130.66, 129.40 × 2 (d, *J* = 8.8 Hz), 128.78 × 2, 127.00 × 2, 117.20 × 2 (d, *J* = 23.1 Hz), 107.58, 24.32. <sup>19</sup>F NMR (376 MHz, Chloroform-*d*): δ -111.27. HRMS (ESI): *m/z* calculated for C<sub>17</sub>H<sub>14</sub>FN<sub>2</sub>O [*M* + *H*]<sup>+</sup>: 281.1090, found: 281.1085.

### 3-(4-Chlorophenyl)-2-methyl-6-phenylpyrimidin-4(3*H*)-one (**3ac**)

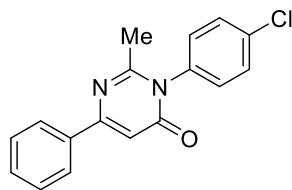

Following typical procedure, **3ac** was obtained as a white solid (65.6 mg, 0.221 mmol, 74%). mp: 168.7 – 169.8 °C. <sup>1</sup>H NMR (400 MHz, Chloroform-*d*): δ 8.04 – 7.97 (m, 2H), 7.56 – 7.50 (m, 2H), 7.48 (ddd, *J* = 4.4, 2.3, 1.2 Hz, 3H), 7.21 (d, *J* = 8.7 Hz, 2H), 6.86 (s, 1H), 2.26 (s, 3H). <sup>13</sup>C NMR (101MHz, Chloroform-*d*): δ 162.93, 160.21, 158.44, 136.01, 135.65, 135.41, 130.60, 130.27, 128.89 × 2, 128.70 × 2, 126.92 × 2, 107.42 × 2, 24.19. HRMS (ESI): *m/z* calculated for C<sub>17</sub>H<sub>14</sub><sup>35</sup>ClN<sub>2</sub>O [M + H]<sup>+</sup>: 297.0795, found: 297.0795.

#### 2-Methyl-6-phenyl-3-(4-(trifluoromethyl)phenyl)pyrimidin-4(3H)-one (3ad)

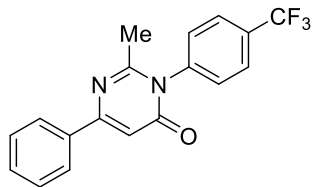

Following typical procedure, **3ad** was obtained as a white solid (70.8 mg, 0.214 mmol, 71%). mp: 213.9 – 214.5 °C. <sup>1</sup>H NMR (400 MHz, Chloroform-*d*): δ 8.05 – 7.98 (m, 2H), 7.85 (d, *J* = 8.2 Hz, 2H), 7.52 – 7.47 (m, 3H), 7.45 – 7.40 (m, 2H), 6.89 (s, 1H), 2.27 (s, 3H). <sup>13</sup>C NMR (101 MHz, Chloroform-*d*): δ 162.83, 160.46, 158.02, 140.50, 136.02, 131.70 (q, *J* = 33.1 Hz), 130.77, 128.81 × 2, 128.38 × 2, 127.28 × 2 (q, *J* = 3.6 Hz), 127.02 × 2, 123.49 (q, *J* = 272.6 Hz), 107.54, 24.29. <sup>19</sup>F NMR (376 MHz, Chloroform-*d*): δ -62.76. HRMS (ESI): *m/z* calculated for C<sub>18</sub>H<sub>14</sub>F<sub>3</sub>N<sub>2</sub>O [M + H]<sup>+</sup>: 331.1058, found: 331.1058.

#### 4-(2-Methyl-6-oxo-4-phenylpyrimidin-1(6H)-yl)benzonitrile (3ae)

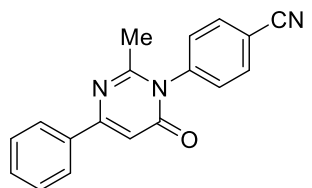

Following typical procedure, **3ae** was obtained as a white solid (19.6 mg, 0.068 mmol, 23%). mp: 257.6 – 258.4 °C. <sup>1</sup>H NMR (400 MHz, Chloroform-*d*): δ 8.04 – 7.98 (m, 2H), 7.88 (d, *J* = 8.5 Hz, 2H), 7.50 (dd, *J* = 5.1, 1.8 Hz, 3H), 7.43 (d, *J* = 8.5 Hz, 2H), 6.88 (s, 1H), 2.27 (s, 3H). <sup>13</sup>C NMR (101 MHz, Chloroform-*d*): δ 162.63, 160.57, 157.56, 141.33, 135.87, 133.93 × 2, 130.88, 129.00 × 2, 128.83 × 2, 127.03 × 2, 117.60, 113.75, 107.47, 24.23. HRMS (ESI): *m/z* calculated for C<sub>18</sub>H<sub>14</sub>N<sub>3</sub>O [M + H]<sup>+</sup>: 288.1137, found: 288.1133.

#### 3-(4-Methoxyphenyl)-2-methyl-6-phenylpyrimidin-4(3H)-one (3af)



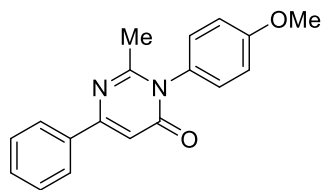

Following typical procedure, **3af** was obtained as a white solid (73.8 mg, 0.252 mmol, 84%). mp: 181.8 – 183.0 °C. <sup>1</sup>H NMR (400 MHz, Chloroform-*d*): δ 8.04 – 7.97 (m, 2H), 7.50 – 7.45 (m, 3H), 7.17 (d, *J* = 8.9 Hz, 2H), 7.05 (d, *J* = 8.9 Hz, 2H), 6.88 (s, 1H), 3.85 (s, 3H), 2.27 (s, 3H). <sup>13</sup>C NMR (101 MHz, Chloroform-*d*): δ 163.39, 160.00, 159.88, 159.34, 136.23, 130.41, 129.65, 128.63 × 2, 128.36 × 2, 126.87 × 2, 115.17 × 2, 107.47, 55.40, 24.21. HRMS (ESI): *m/z* calculated for C<sub>18</sub>H<sub>17</sub>N<sub>2</sub>O<sub>2</sub> [*M* + *H*]<sup>+</sup>: 293.1290, found: 293.1293.

### 2-Methyl-6-phenyl-3-(*m*-tolyl)pyrimidin-4(3*H*)-one (**3ag**)

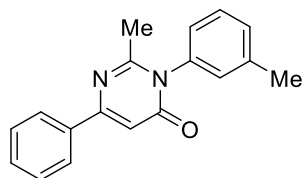

Following typical procedure, **3ag** was obtained as a brown liquid (69.7 mg, 0.252 mmol, 84%). <sup>1</sup>H NMR (400 MHz, Chloroform-*d*): δ 8.05 – 7.98 (m, 2H), 7.48 (tt, *J* = 3.6, 2.6 Hz, 3H), 7.43 (dd, *J* = 7.6, 0.7 Hz, 1H), 7.33 – 7.29 (m, 1H), 7.10 – 7.03 (m, 2H), 6.90 (s, 1H), 2.43 (s, 3H), 2.27 (s, 3H). <sup>13</sup>C NMR (101 MHz, Chloroform-*d*): δ 163.18, 160.07, 158.89, 140.10, 137.11, 136.20, 130.41, 130.10, 129.72, 128.62 × 2, 127.79, 126.87 × 2, 124.26, 107.52, 24.12, 21.22. HRMS (ESI): *m/z* calculated for C<sub>18</sub>H<sub>17</sub>N<sub>2</sub>O [*M* + *H*]<sup>+</sup>: 277.1341, found: 277.1339.

### 3-(3-Bromophenyl)-2-methyl-6-phenylpyrimidin-4(3*H*)-one (**3ah**)

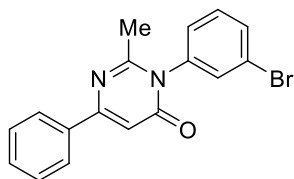

Following typical procedure, **3ah** was obtained as a gray solid (87.5 mg, 0.256 mmol, 85%). mp: 135.6 – 137.7 °C. <sup>1</sup>H NMR (400 MHz, Chloroform-*d*): δ 8.04 – 7.97 (m, 2H), 7.66 (ddd, *J* = 8.1, 1.9, 1.0 Hz, 1H), 7.52 – 7.42 (m, 5H), 7.23 (ddd, *J* = 7.9, 2.0, 1.0 Hz, 1H), 6.88 (s, 1H), 2.29 (s, 3H). <sup>13</sup>C NMR (101 MHz, Chloroform-*d*): δ 162.91, 160.38, 158.36, 138.47, 136.09, 132.71, 131.26, 130.80, 130.70, 128.78 × 2, 127.02 × 2, 126.42, 123.41, 107.56, 24.27. HRMS (ESI): *m/z* calculated for C<sub>17</sub>H<sub>14</sub><sup>79</sup>BrN<sub>2</sub>O [*M* + *H*]<sup>+</sup>: 341.0290, found: 341.0288.

### 3-(3-Acetylphenyl)-2-methyl-6-phenylpyrimidin-4(3*H*)-one (**3ai**)

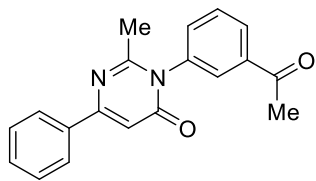

Following typical procedure, **3ai** was obtained as a white solid (43.8 mg, 0.144 mmol, 48%). mp: 89.2 – 89.7 °C. <sup>1</sup>H NMR (400 MHz, Chloroform-*d*): δ 8.09 (dd, *J* = 7.9, 1.3 Hz, 1H), 8.05 – 7.99 (m, 2H), 7.88 (dd, *J* = 1.5, 0.7 Hz, 1H), 7.69 (td, *J* = 7.8, 0.9 Hz, 1H), 7.50 (ddd, *J* = 5.2, 2.9, 1.5 Hz, 4H), 6.91 (s, 1H), 2.63 (s, 3H), 2.28 (s, 3H). <sup>13</sup>C NMR (101 MHz, Chloroform-*d*): δ 196.49, 163.20, 160.64, 158.41, 138.97, 137.87, 136.11, 132.13, 130.78, 130.50, 129.35, 128.83 × 2, 127.39, 127.07 × 2, 107.55, 26.66, 24.39. HRMS (ESI): *m/z* calculated for C<sub>19</sub>H<sub>17</sub>N<sub>2</sub>O<sub>2</sub> [M + H]<sup>+</sup>: 305.1290, found: 305.1290.

### 2-Methyl-6-phenyl-3-(*o*-tolyl)pyrimidin-4(3*H*)-one (3aj)

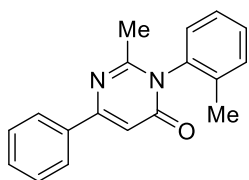

Following typical procedure, **3aj** was obtained as a yellow liquid (49.8 mg, 0.180 mmol, 60%). <sup>1</sup>H NMR (400 MHz, Chloroform-*d*): δ 8.07 – 8.00 (m, 2H), 7.53 – 7.47 (m, 3H), 7.44 – 7.35 (m, 3H), 7.19 – 7.14 (m, 1H), 6.91 (s, 1H), 2.22 (s, 3H), 2.17 (s, 3H). <sup>13</sup>C NMR (101 MHz, Chloroform-*d*): δ 162.69, 160.37, 158.95, 136.46, 136.27, 134.88, 131.62, 130.60, 129.72, 128.78 × 2, 127.72, 127.36, 127.00 × 2, 107.65, 23.80, 17.34. HRMS (ESI): *m/z* calculated for C<sub>18</sub>H<sub>17</sub>N<sub>2</sub>O [M + H]<sup>+</sup>: 277.1341, found: 277.1338.

### 3-(2-Chlorophenyl)-2-methyl-6-phenylpyrimidin-4(3*H*)-one (3ak)

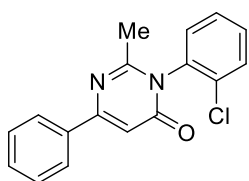

Following typical procedure, **3ak** was obtained as a yellow liquid (48.2 mg, 0.162 mmol, 54%). <sup>1</sup>H NMR (400 MHz, Chloroform-*d*): δ 8.11 – 8.00 (m, 2H), 7.62 (dd, *J* = 6.0, 3.5 Hz, 1H), 7.54 – 7.44 (m, 5H), 7.35 (d, *J* = 3.5 Hz, 1H), 6.90 (s, 1H), 2.26 (s, 3H). <sup>13</sup>C NMR (101 MHz, Chloroform-*d*): δ 162.30, 160.41, 158.51, 136.14, 135.08, 132.02, 130.88, 130.82, 130.64, 129.33, 128.74 × 2, 128.42, 127.03 × 2, 107.52, 23.47. HRMS (ESI): *m/z* calculated for C<sub>17</sub>H<sub>14</sub><sup>35</sup>ClN<sub>2</sub>O [M + H]<sup>+</sup>: 297.0795, found: 297.0795.

### 2-Methyl-3,6-diphenylpyrimidin-4(3*H*)-one (3al)

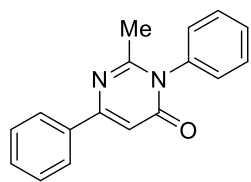

Following typical procedure, **3al** was obtained as a white solid (48.3 mg, 0.184 mmol, 61%). mp: 147 – 148 °C. <sup>1</sup>H NMR (400 MHz, Chloroform-*d*): δ 8.05 – 7.98 (m, 2H), 7.61 – 7.55 (m, 2H), 7.54 – 7.51 (m, 1H), 7.50 – 7.47 (m, 3H), 7.28 (d, *J* = 1.5 Hz, 2H), 6.89 (s, 1H), 2.27 (s, 3H). <sup>13</sup>C NMR (101 MHz, Chloroform-*d*): δ 163.22, 160.24, 158.88, 137.40, 136.36, 130.57, 130.10 × 2, 129.43, 128.78 × 2, 127.52 × 2, 127.01 × 2, 107.74, 24.32. HRMS (ESI): *m/z* calculated for C<sub>17</sub>H<sub>15</sub>N<sub>2</sub>O [M + H]<sup>+</sup>: 263.1184, found: 263.1182.

### 2-Methyl-3-(naphthalen-1-yl)-6-phenylpyrimidin-4(3H)-one (3am)

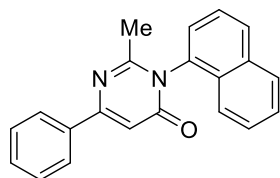

Following typical procedure, **3am** was obtained as a yellow liquid (65.8 mg, 0.211 mmol, 70%). <sup>1</sup>H NMR (400 MHz, Chloroform-*d*): δ 8.12 – 8.06 (m, 2H), 8.04 – 8.00 (m, 1H), 8.00 – 7.96 (m, 1H), 7.64 (dd, *J* = 8.3, 7.3 Hz, 1H), 7.60 – 7.50 (m, 6H), 7.46 (dd, *J* = 7.3, 1.1 Hz, 1H), 7.00 (s, 1H), 2.19 (s, 3H). <sup>13</sup>C NMR (101 MHz, Chloroform-*d*): δ 163.27, 160.47, 159.66, 136.27, 134.56, 133.83, 130.66, 130.04, 129.11, 128.81 × 2, 126.77, 127.98, 127.07 × 2, 126.94, 125.68 × 2, 121.37, 107.66, 23.58. HRMS (ESI): *m/z* calculated for C<sub>21</sub>H<sub>17</sub>N<sub>2</sub>O [M + H]<sup>+</sup>: 313.1341, found: 313.1339.

### 3-Benzyl-2-methyl-6-phenylpyrimidin-4(3H)-one (3an)

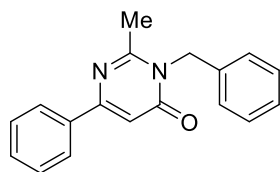

Following typical procedure, **3an** was obtained as a white solid (59.4 mg, 0.215 mmol, 72%). mp: 122.1 – 122.6 °C. <sup>1</sup>H NMR (400 MHz, Chloroform-*d*): δ 8.02 – 7.96 (m, 2H), 7.50 – 7.44 (m, 3H), 7.39 – 7.32 (m, 2H), 7.32 – 7.28 (m, 1H), 7.25 – 7.21 (m, 2H), 6.88 (s, 1H), 5.35 (s, 2H), 2.55 (s, 3H). <sup>13</sup>C NMR (101 MHz, Chloroform-*d*): δ 163.22, 159.89, 159.28, 136.25, 135.29, 130.48, 128.94 × 2, 128.71 × 2, 127.76, 126.92 × 2, 126.62 × 2, 107.16, 46.87, 23.34. HRMS (ESI): *m/z* calculated for C<sub>18</sub>H<sub>17</sub>N<sub>2</sub>O [M + H]<sup>+</sup>: 277.1341, found: 277.1337.

### 3-Ethyl-2-methyl-6-phenylpyrimidin-4(3H)-one (3ao)

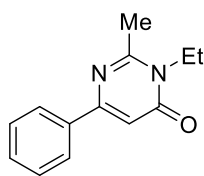

Following typical procedure, **3ao** was obtained as a white solid (42.7 mg, 0.199 mmol, 66%). mp: 101.7 – 102.9 °C. <sup>1</sup>H NMR (400 MHz, Chloroform-*d*): δ 7.96 – 7.90 (m, 2H), 7.47 – 7.41 (m, 3H), 6.75 (s, 1H), 4.11 (q, *J* = 7.2 Hz, 2H), 2.64 (s, 3H), 1.35 (t, *J* = 7.2 Hz, 3H). <sup>13</sup>C NMR (101 MHz, Chloroform-*d*): δ 162.76, 159.63, 158.35, 136.38, 130.27, 128.63 × 2, 126.79 × 2, 107.29, 39.46, 22.79, 13.39. HRMS (ESI): *m/z* calculated for C<sub>13</sub>H<sub>15</sub>N<sub>2</sub>O [*M* + *H*]<sup>+</sup>: 215.1184, found: 215.1180.

### 3-Butyl-2-methyl-6-phenylpyrimidin-4(3*H*)-one (**3ap**)

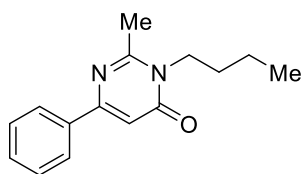

Following typical procedure, **3ap** was obtained as a white solid (40.4 mg, 0.167 mmol, 56%). mp: 79.7 – 79.8 °C. <sup>1</sup>H NMR (400 MHz, Chloroform-*d*): δ 7.98 – 7.89 (m, 2H), 7.48 – 7.41 (m, 3H), 6.75 (s, 1H), 4.11 – 3.95 (m, 2H), 2.64 (s, 3H), 1.80 – 1.63 (m, 2H), 1.52 – 1.39 (m, 2H), 0.99 (t, *J* = 7.3 Hz, 3H). <sup>13</sup>C NMR (101 MHz, Chloroform-*d*): δ 162.90, 159.55, 158.47, 136.41, 130.26, 128.63 × 2, 126.80 × 2, 107.28, 44.26, 30.33, 22.95, 20.22, 13.67. HRMS (ESI): *m/z* calculated for C<sub>15</sub>H<sub>19</sub>N<sub>2</sub>O [*M* + *H*]<sup>+</sup>: 243.1497, found: 243.1495.

### 3-Cyclohexyl-2-methyl-6-phenylpyrimidin-4(3*H*)-one (**3aq**)

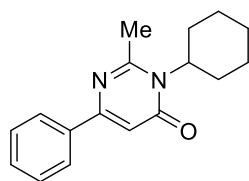

Following typical procedure, **3aq** was obtained as a white solid (43.2 mg, 0.161 mmol, 54%). mp: 135.6 – 136.8 °C. <sup>1</sup>H NMR (400 MHz, Chloroform-*d*): δ 7.96 – 7.90 (m, 2H), 7.45 – 7.40 (m, 3H), 6.67 (s, 1H), 3.96 (s, 1H), 2.75 (brs, 2H), 2.65 (s, 3H), 2.00 – 1.85 (m, 2H), 1.75 – 1.68 (m, 3H), 1.40 – 1.28 (m, 3H). <sup>13</sup>C NMR (101 MHz, Chloroform-*d*): δ 163.77, 158.70, 158.46, 136.27, 130.14 × 2, 128.58 × 2, 126.71 × 2, 28.13, 26.40 × 4, 24.94, 24.28. HRMS (ESI): *m/z* calculated for C<sub>17</sub>H<sub>21</sub>N<sub>2</sub>O [*M* + *H*]<sup>+</sup>: 269.1654, found: 269.1654.

### 3,3'-(1,4-Phenylene)bis(2-methyl-6-phenylpyrimidin-4(3*H*)-one) (**3ar**)

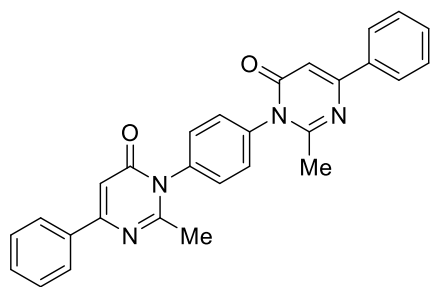

Following the procedure of 2.4, **3ar** was obtained as a white solid (120.0 mg, 0.269 mmol, 90%). mp: 182.8 – 183.0 °C. <sup>1</sup>H NMR (400 MHz, Chloroform-*d*): δ 8.08 – 7.99 (m, 4H), 7.54 – 7.46 (m, 10H), 6.90 (s, 2H), 2.39 (s, 6H). <sup>13</sup>C NMR (101 MHz, Chloroform-*d*): δ 163.02 × 2, 160.52 × 2, 158.60 × 2, 138.20 × 2, 136.09 × 2, 130.78 × 2, 129.52 × 4, 128.82 × 4, 127.06 × 4, 107.46 × 2, 24.58 × 2. HRMS (ESI): *m/z* calculated for C<sub>28</sub>H<sub>23</sub>N<sub>4</sub>O<sub>2</sub> [M + H]<sup>+</sup>: 447.1821, found: 447.1833.

**6-((3*S*,8*S*,9*S*,10*R*,13*S*,14*S*,17*S*)-3-Methoxy-10,13-dimethyl-2,3,4,7,8,9,10,11,12,13,14,15,16,17-tetradecahydro-1*H*-cyclopenta[*a*]phenanthren-17-yl)-2-methyl-3-(*p*-tolyl)pyrimidin-4(3*H*)-one (5)**

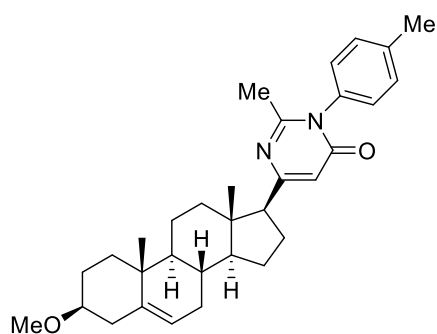

Following typical procedure, **5** was obtained as a white solid (127.9 mg, 0.263 mmol, 88%). mp: 246.6 – 247.0 °C. [α]<sub>D</sub><sup>20</sup>: -30.25 (*c* = 0.40, CHCl<sub>3</sub>). <sup>1</sup>H NMR (400 MHz, Chloroform-*d*): δ 7.35 – 7.31 (m, 2H), 7.11 – 7.09 (m, 2H), 6.32 (s, 2H), 5.43 – 5.32 (m, 1H), 3.36 (s, 3H), 3.11 – 3.03 (m, 1H), 2.56 (t, *J* = 9.4 Hz, 1H), 2.42 (s, 3H), 2.40 – 2.38 (m, 1H), 2.22 – 2.16 (m, 2H), 2.15 (s, 3H), 2.07 – 1.94 (m, 2H), 1.93 – 1.85 (m, 2H), 1.83 – 1.75 (m, 2H), 1.65 – 1.60 (m, 2H), 1.53 – 1.51 (m, 1H), 1.46 – 1.39 (m, 2H), 1.39 – 1.31 (m, 2H), 1.28 – 1.21 (m, 1H), 1.09 – 1.03 (m, 1H), 1.01 (s, 3H), 0.62 (s, 3H). <sup>13</sup>C NMR (101 MHz, Chloroform-*d*): δ 166.38, 162.91, 157.16, 140.73, 139.14, 134.63 × 2, 130.51, 126.96, 121.22, 110.48, 80.08, 56.94, 56.59, 55.45, 50.06, 44.87, 38.49, 38.01, 36.99, 36.77, 31.97, 31.73, 27.79, 24.43, 24.36, 23.97, 21.10, 20.65, 19.77, 19.25, 12.85. HRMS (ESI): *m/z* calculated for C<sub>32</sub>H<sub>43</sub>N<sub>2</sub>O<sub>2</sub> [M + H]<sup>+</sup>: 487.3325, found: 487.3322.

**(6*bS*,8*aS*,13*aS*,13*bR*)-4-(Benzyloxy)-8*a*,10-dimethyl-11-(*p*-tolyl)-6*b*,7,8,8*a*,11,13,13*a*,13*b*-octahydro-1*H*-naphtho[2',1':4,5]indeno[1,2-*d*]pyrimidin-12(2*H*)-one (7)**

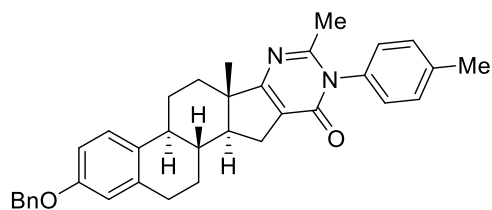

Following typical procedure, **7** was obtained as a white solid (91.3 mg, 0.177 mmol, 59%). mp: 243.0 – 244.1 °C.  $[\alpha]_{\text{D}}^{20}$ : +63.17 ( $c = 0.40$ ,  $\text{CHCl}_3$ ).

$^1\text{H}$  NMR (400 MHz, Chloroform- $d$ ):  $\delta$  7.51 – 7.30

(m, 8H), 7.14 (dd,  $J = 8.2, 2.3$  Hz, 1H), 7.07 (dd,  $J = 8.2, 2.4$  Hz, 1H), 6.83 (dd,  $J = 8.6, 2.8$  Hz, 1H), 6.78 (d,  $J = 2.8$  Hz, 1H), 5.06 (s, 2H), 3.05 – 2.91 (m, 2H), 2.85 (dd,  $J = 15.0, 6.4$  Hz, 1H), 2.45 (s, 3H), 2.44 – 2.36 (m, 2H), 2.34 – 2.25 (m, 1H), 2.23 (s, 3H), 2.09 – 1.99 (m, 2H), 1.86 (dd,  $J = 11.5, 6.4$  Hz, 1H), 1.81 – 1.68 (m, 3H), 1.53 (td,  $J = 12.0, 6.6$  Hz, 1H), 1.08 (s, 3H).  $^{13}\text{C}$  NMR (101 MHz, Chloroform- $d$ ):  $\delta$  175.84, 161.32, 159.72, 156.67, 139.08, 137.78, 137.13, 135.18, 132.53, 130.53, 130.50, 128.41  $\times 2$ , 127.72, 127.33  $\times 2$ , 127.24, 126.88, 125.93, 120.91, 114.71, 112.18, 69.77, 54.40, 46.83, 44.26, 37.10, 32.87, 29.46, 27.23, 26.91, 26.02, 24.26, 21.13, 16.41. HRMS (ESI):  $m/z$  calculated for  $\text{C}_{35}\text{H}_{37}\text{N}_2\text{O}_2$   $[\text{M} + \text{H}]^+$ : 517.2855, found: 517.2856.

#### Methyl (*S*)-4-methyl-2-(2-methyl-6-oxo-4-phenylpyrimidin-1(6*H*)-yl)pentanoate (**9**)

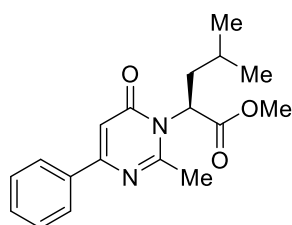

Following typical procedure, **9** was obtained as a yellow liquid (55.6 mg, 0.177 mmol, 59%).  $[\alpha]_{\text{D}}^{20}$ : -59.17 ( $c = 0.20$ ,  $\text{CHCl}_3$ ).  $^1\text{H}$  NMR

(400 MHz, Chloroform- $d$ ):  $\delta$  8.01 – 7.91 (m, 2H), 7.46 (dt,  $J = 4.7, 1.7$  Hz, 3H), 6.76 (s, 1H), 3.74 (s, 3H), 2.63 (s, 3H), 2.44 – 2.38 (m,

2H), 1.92 – 1.85 (m, 1H), 1.75 – 1.60 (m, 1H), 1.01 (d,  $J = 6.5$  Hz, 3H), 0.95 (d,  $J = 6.7$  Hz, 3H).  $^{13}\text{C}$  NMR (101 MHz, Chloroform- $d$ ):  $\delta$  169.70, 162.66, 159.74, 158.32, 136.03, 130.56, 128.70  $\times 2$ , 126.94  $\times 2$ , 107.42, 52.72, 38.44, 25.48, 23.67, 22.68, 22.54. HRMS (ESI):  $m/z$  calculated for  $\text{C}_{18}\text{H}_{23}\text{N}_2\text{O}_3$   $[\text{M} + \text{H}]^+$ : 315.1709, found: 315.1693.

HPLC (Chiralcel IA): Hexane/isopropanol = 90:10, 1.0 mL/minute,  $\lambda = 254$  nm,  $t^1 = 8.424$  min,  $t^2 = 10.641$  min, ee >99%.

## HPLC spectrum of racemic and enantio-enriched 9

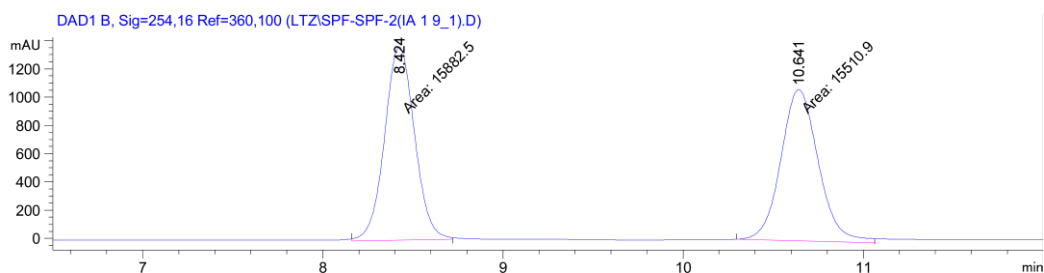

### Area Percent Report

Sorted By : Signal  
Multiplier : 1.0000  
Dilution : 1.0000  
Sample Amount : 1.00000 [ng/ul] (not used in calc.)

Use Multiplier & Dilution Factor with ISTDs

Signal 2: DAD1 B, Sig=254,16 Ref=360,100

| Peak # | RetTime [min] | Type | Width [min] | Area [mAU*s] | Height [mAU] | Area %  |
|--------|---------------|------|-------------|--------------|--------------|---------|
| 1      | 8.424         | MM   | 0.1931      | 1.58825e4    | 1370.90820   | 50.5919 |
| 2      | 10.641        | MM   | 0.2412      | 1.55109e4    | 1071.85547   | 49.4081 |

Totals : 3.13934e4 2442.76367

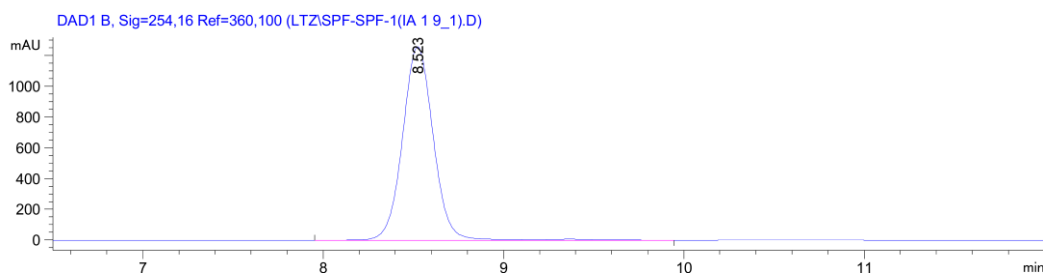

### Area Percent Report

Sorted By : Signal  
Multiplier : 1.0000  
Dilution : 1.0000  
Sample Amount : 1.00000 [ng/ul] (not used in calc.)

Use Multiplier & Dilution Factor with ISTDs

Signal 2: DAD1 B, Sig=254,16 Ref=360,100

| Peak # | RetTime [min] | Type | Width [min] | Area [mAU*s] | Height [mAU] | Area %   |
|--------|---------------|------|-------------|--------------|--------------|----------|
| 1      | 8.523         | BV R | 0.1819      | 1.50255e4    | 1257.95593   | 100.0000 |

Totals : 1.50255e4 1257.95593

### 3. References

1. M.-N. Zhao, L. Yu, R.-R. Hui, Z.-H. Ren, Y.-Y. Wang and Z.-H. Guan, *ACS Catal.*, 2016, **6**, 3473–3477.
2. Z.-H. Guan, Z.-Y. Zhang, Z.-H. Ren, Y.-Y. Wang and X. Zhang, *J. Org. Chem.*, 2011, **76**, 339–341.
3. C. Simons, U. Hanefeld, I. W. C. E. Arends, R. A. Sheldon and T. Maschmeyer, *Chem. – Eur. J.*, 2004, **10**, 2829–2835.
4. J. T. Reeves, Z. Tan, Z. S. Han, G. Li, Y. Zhang, Y. Xu, D. C. Reeves, N. C. Gonnella, S. Ma, H. Lee, B. Z. Lu and C. H. Senanayake, *Angew. Chem., Int. Ed.*, 2012, **51**, 1400–1404.
5. W. Yu, J. Chen, K. Gao, Z. Liu and Y. Zhang, *Org. Lett.*, 2014, **16**, 4870–4873.



#### 4. NMR spectra of the products

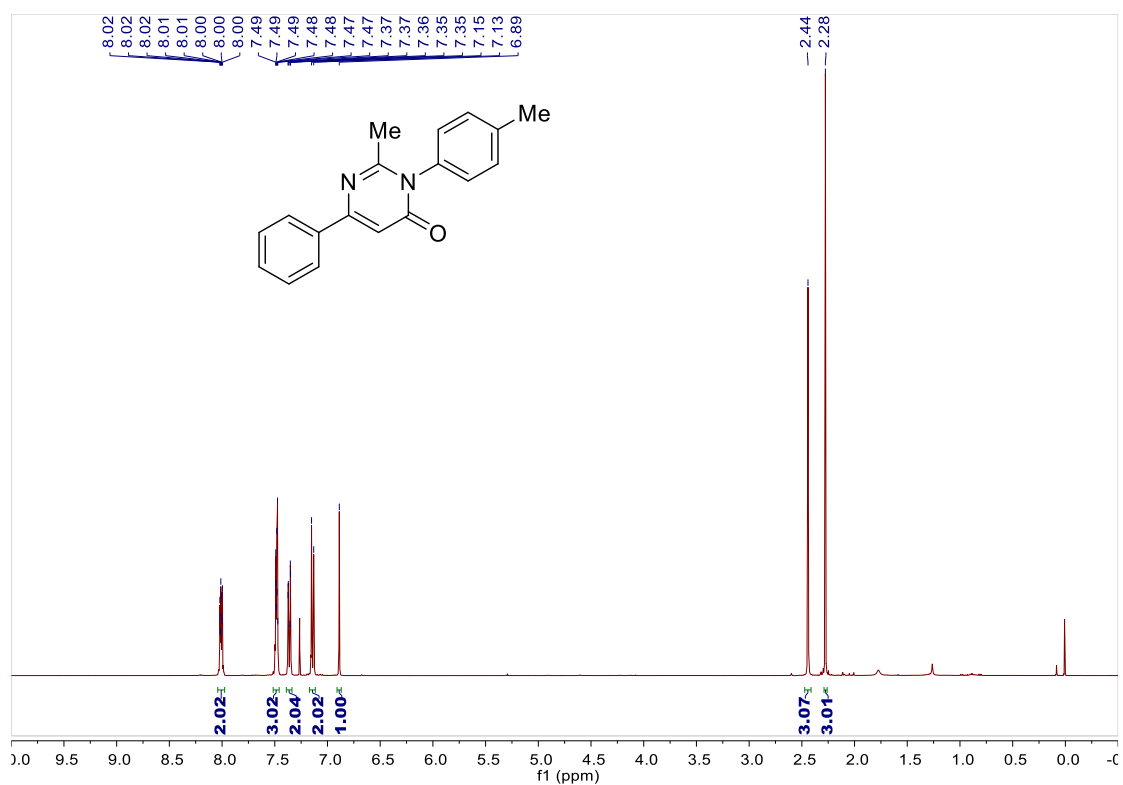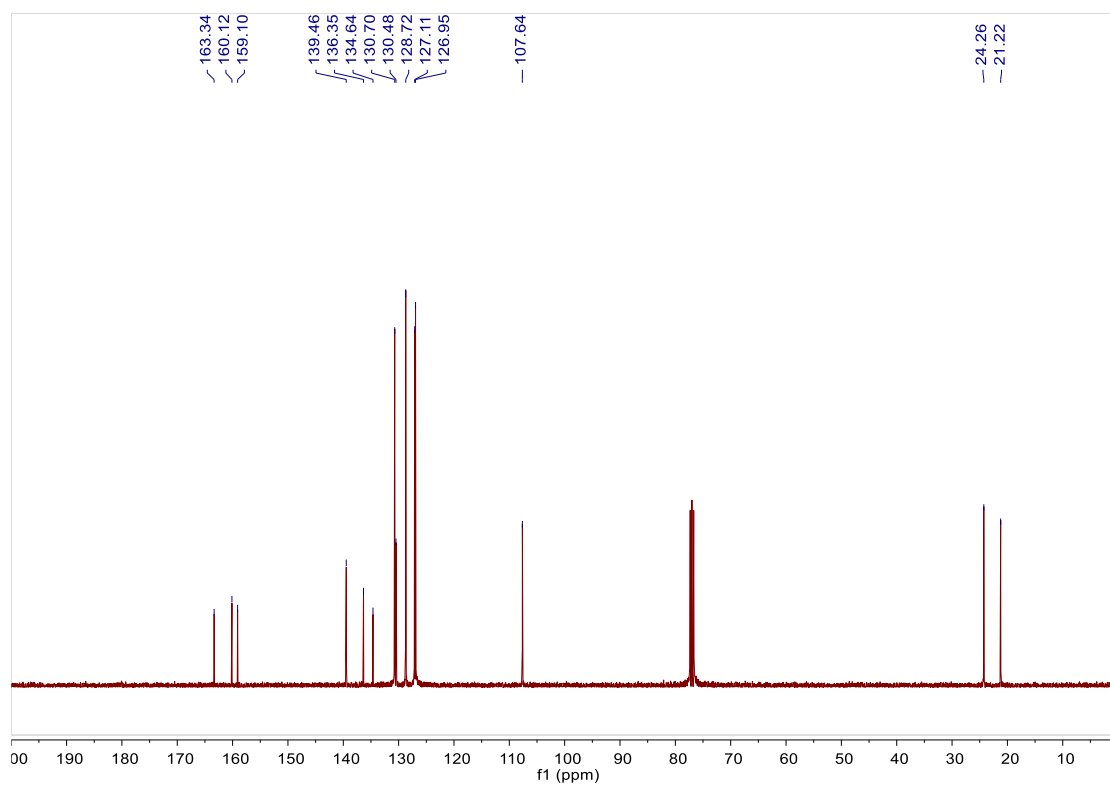

<sup>1</sup>H and <sup>13</sup>C NMR spectra for product 3aa (CDCl<sub>3</sub>)

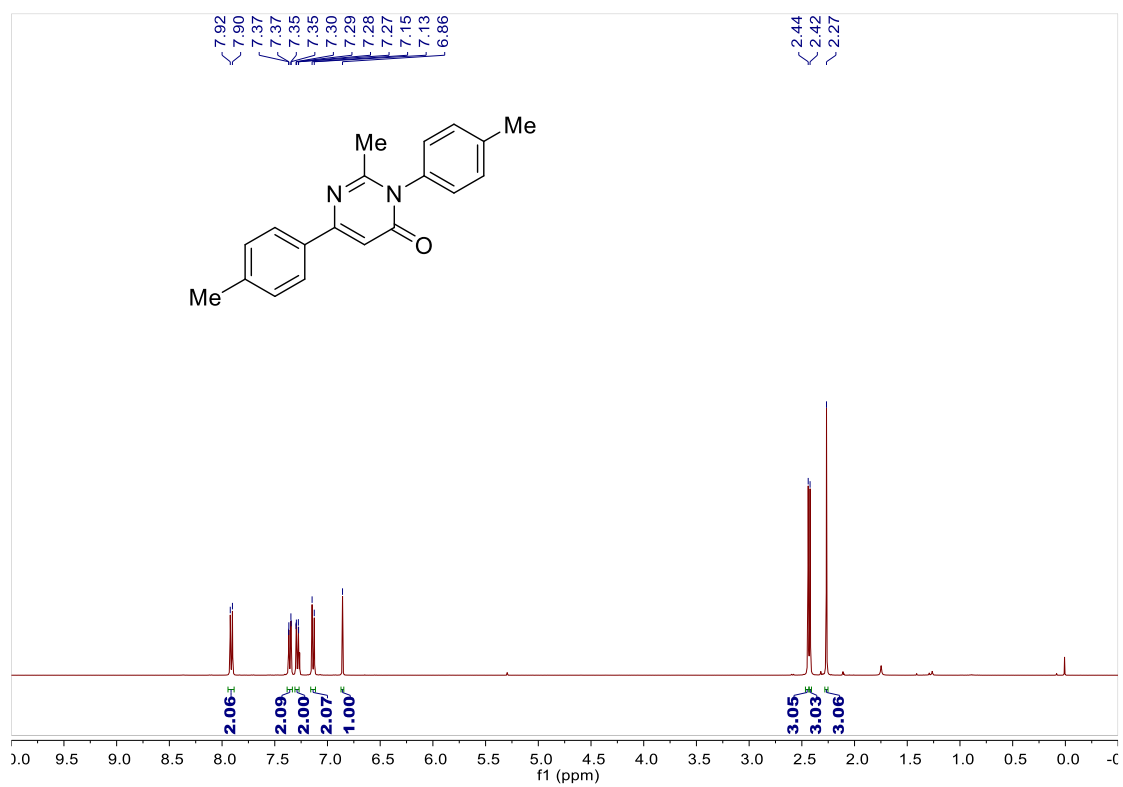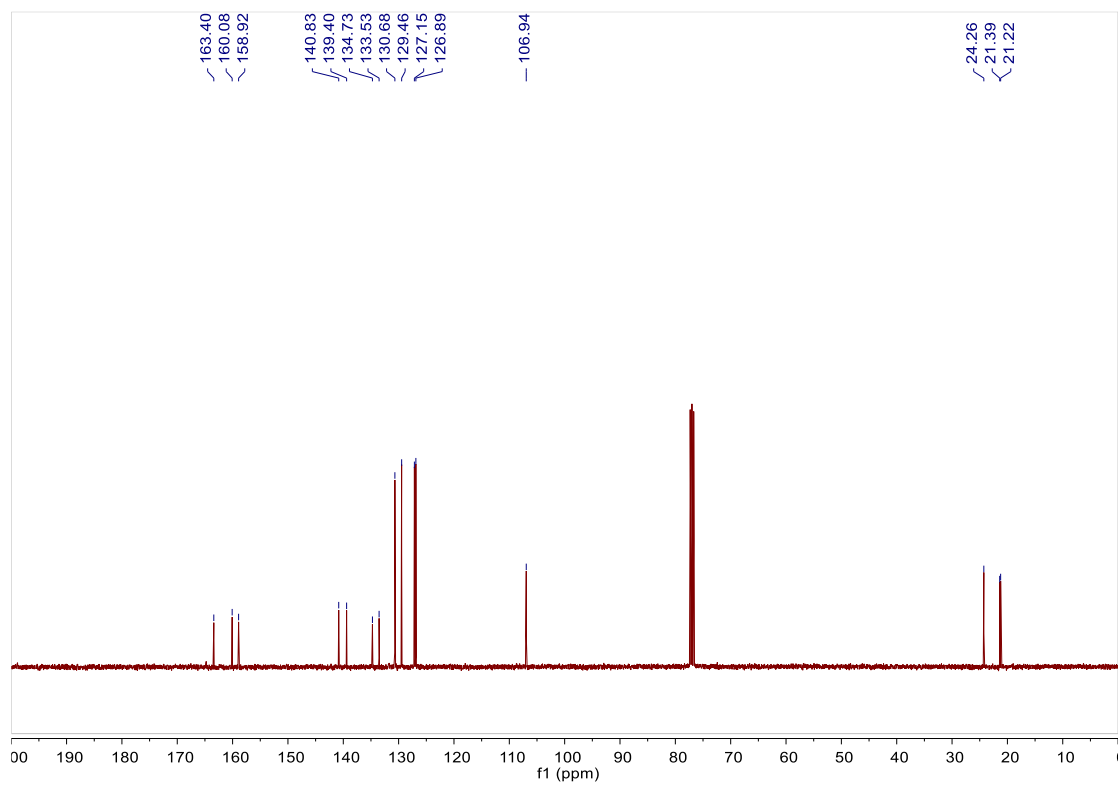

**<sup>1</sup>H and <sup>13</sup>C NMR spectra for product 3ba (CDCl<sub>3</sub>)**

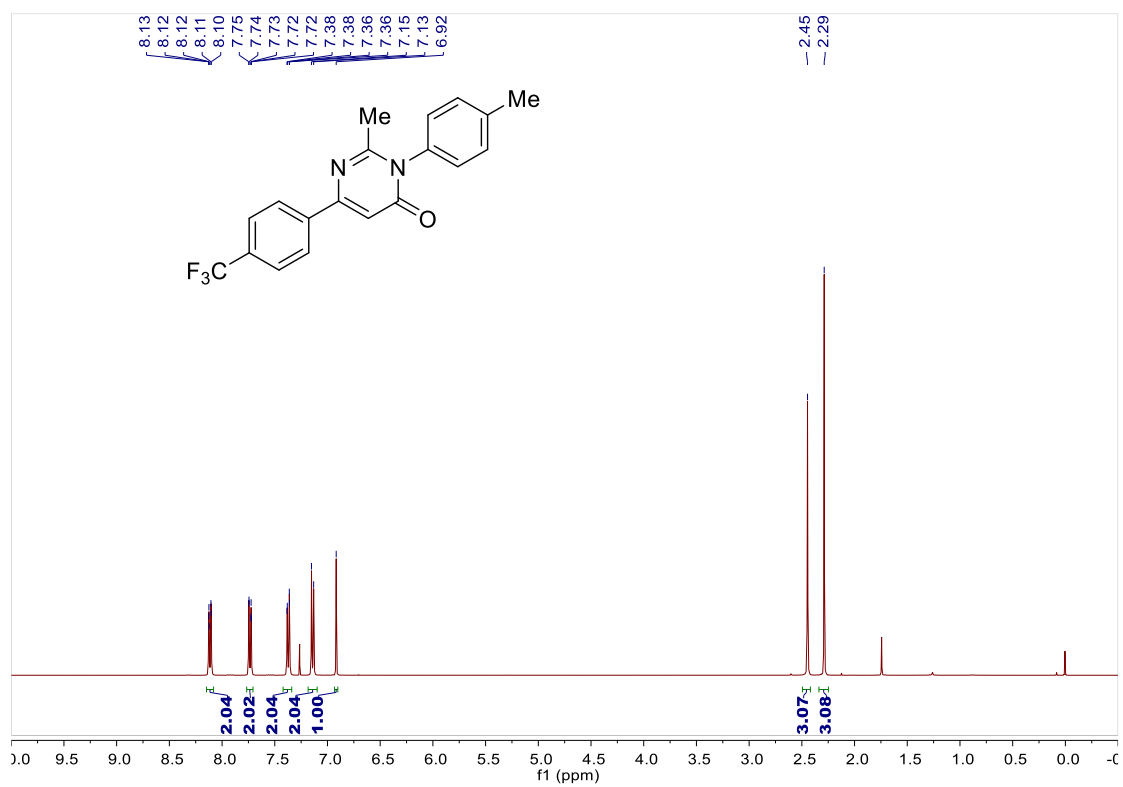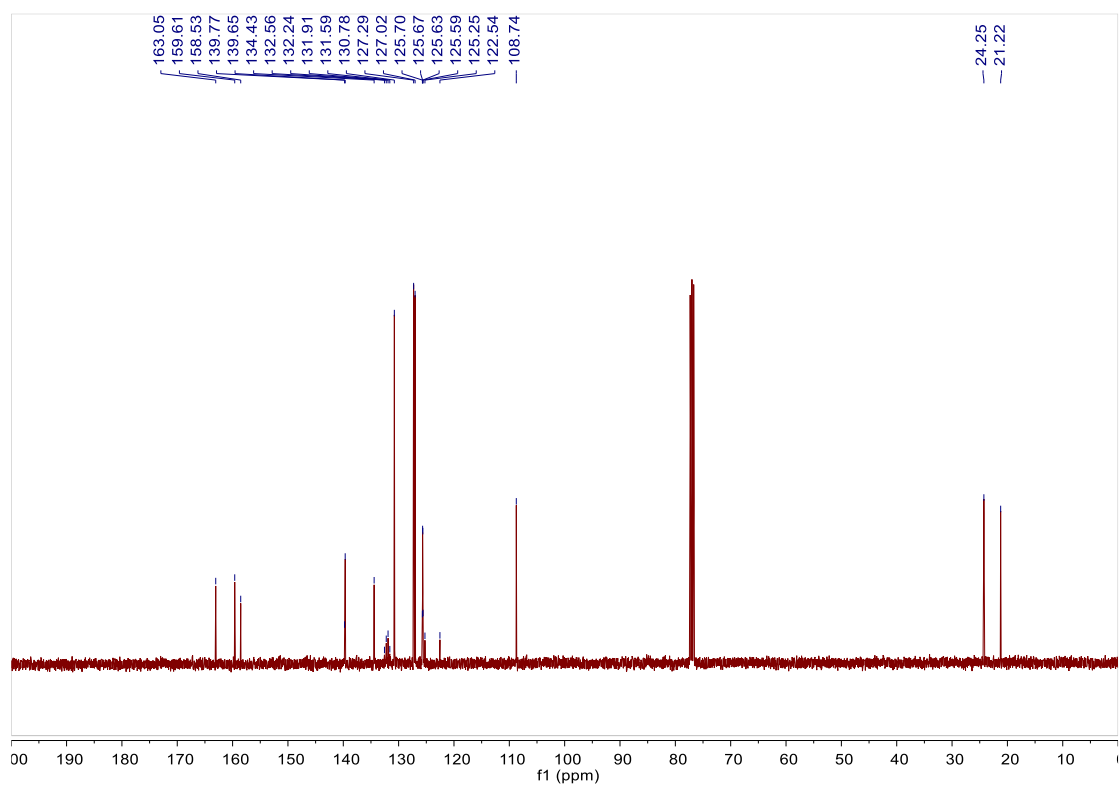

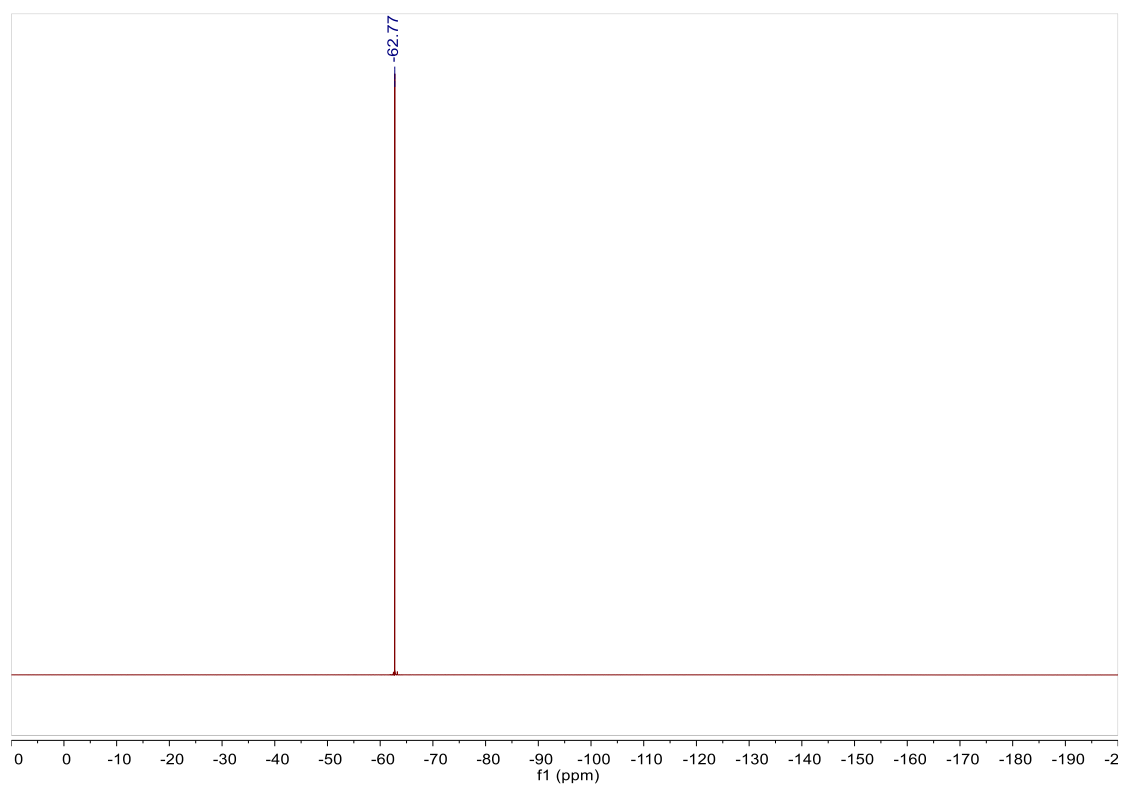

**$^1\text{H}$ ,  $^{13}\text{C}$ , and  $^{19}\text{F}$  NMR spectra for product 3ca ( $\text{CDCl}_3$ )**

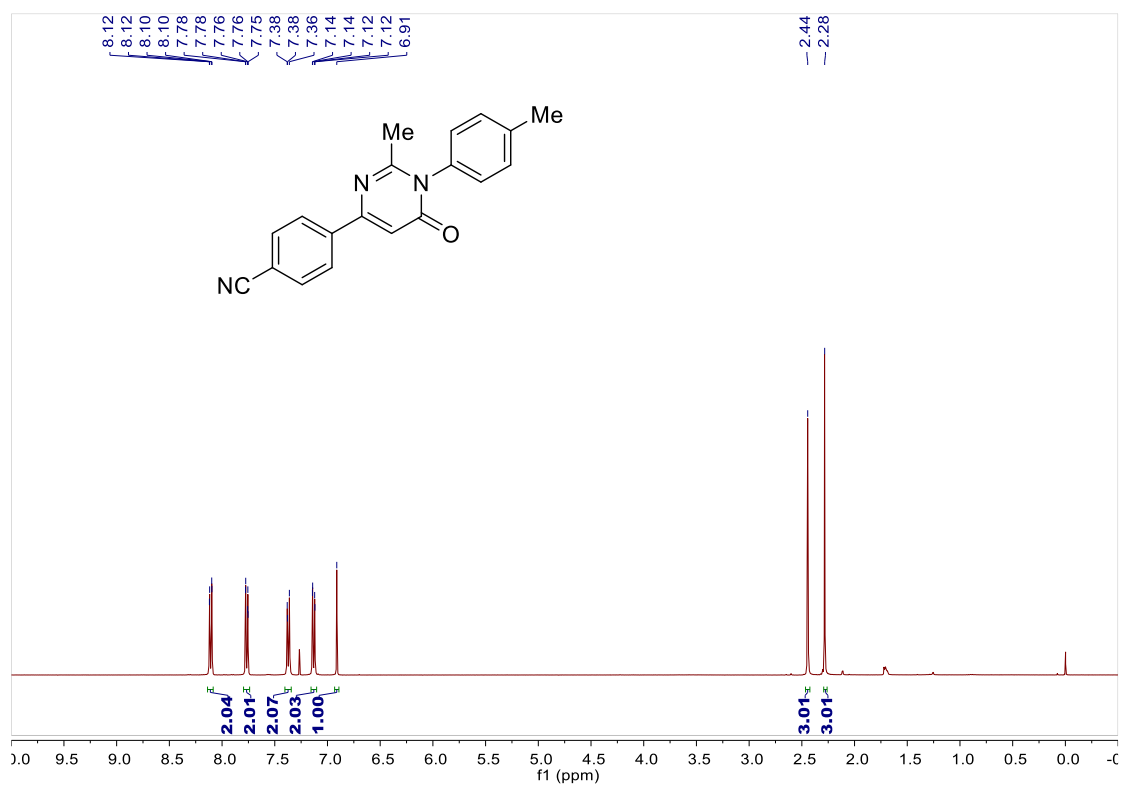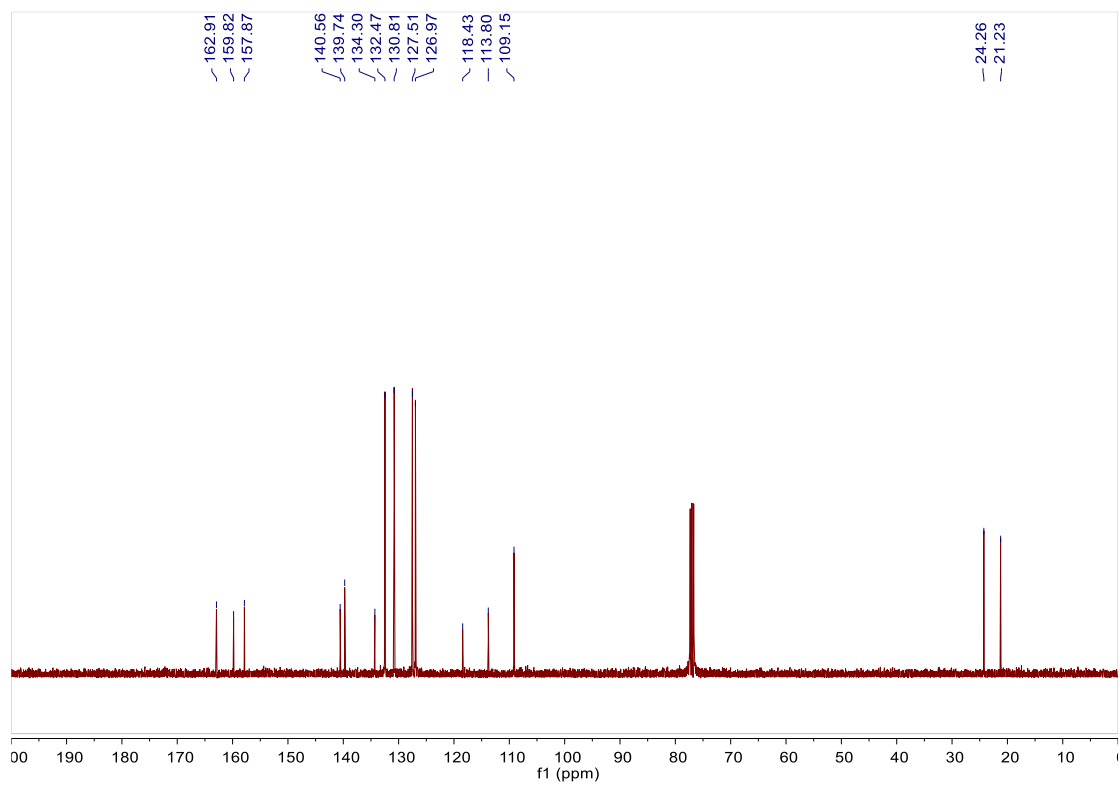

**<sup>1</sup>H and <sup>13</sup>C NMR spectra for product 3da (CDCl<sub>3</sub>)**

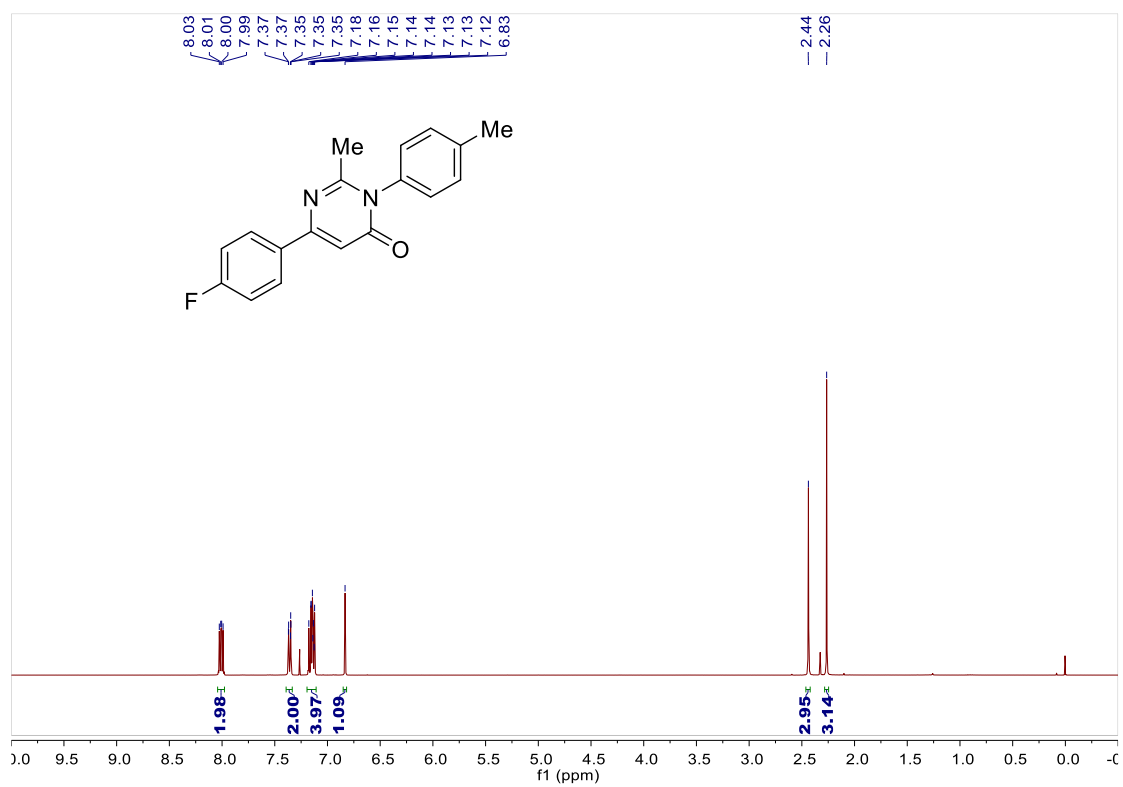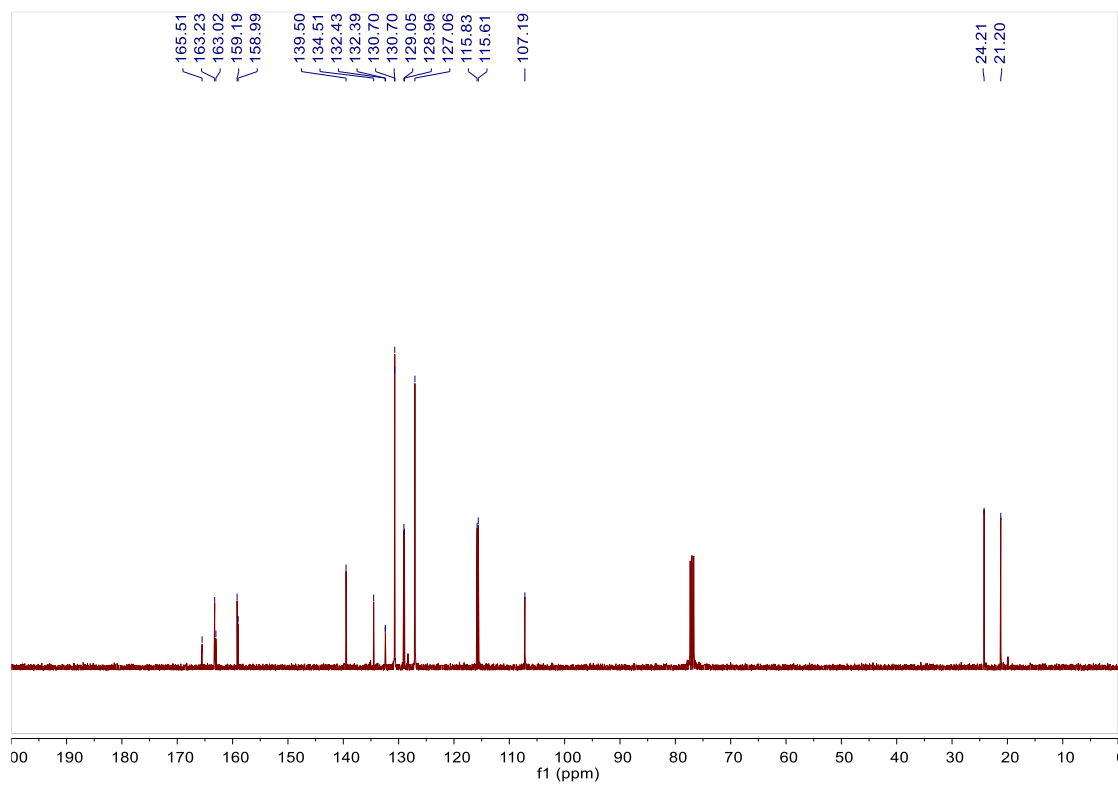

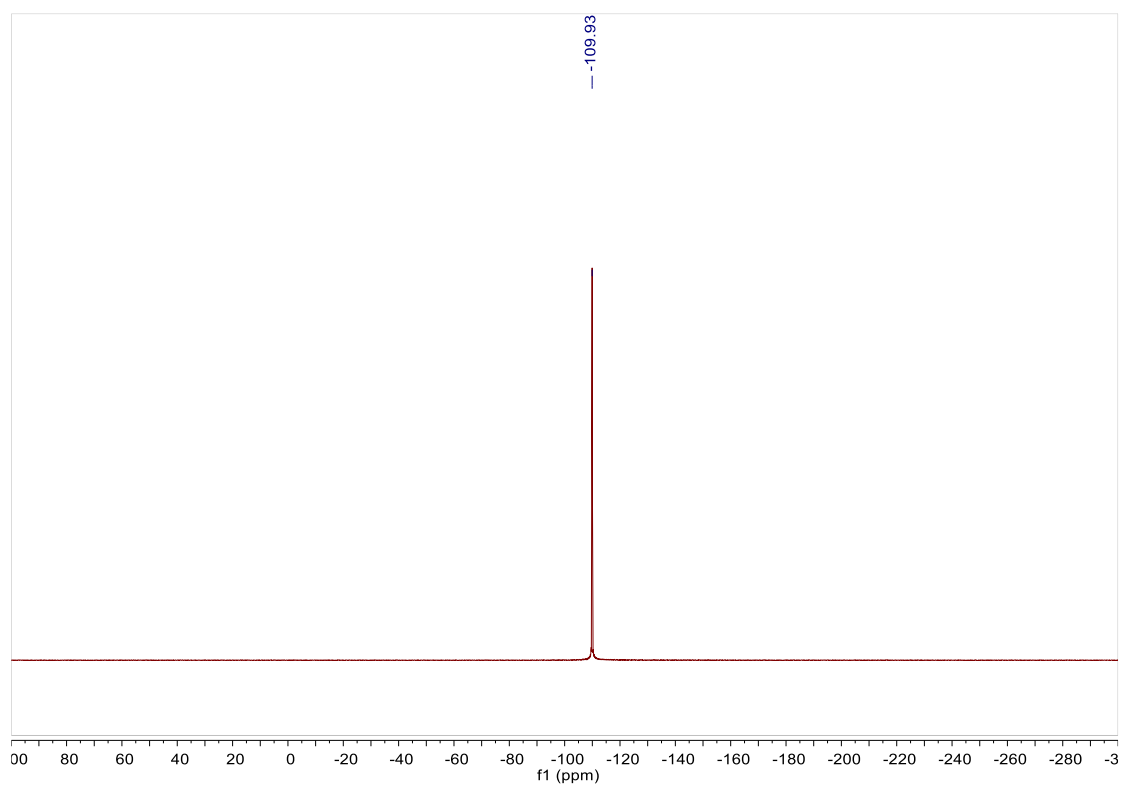

**$^1\text{H}$ ,  $^{13}\text{C}$  and  $^{19}\text{F}$  NMR spectra for product 3ea ( $\text{CDCl}_3$ )**

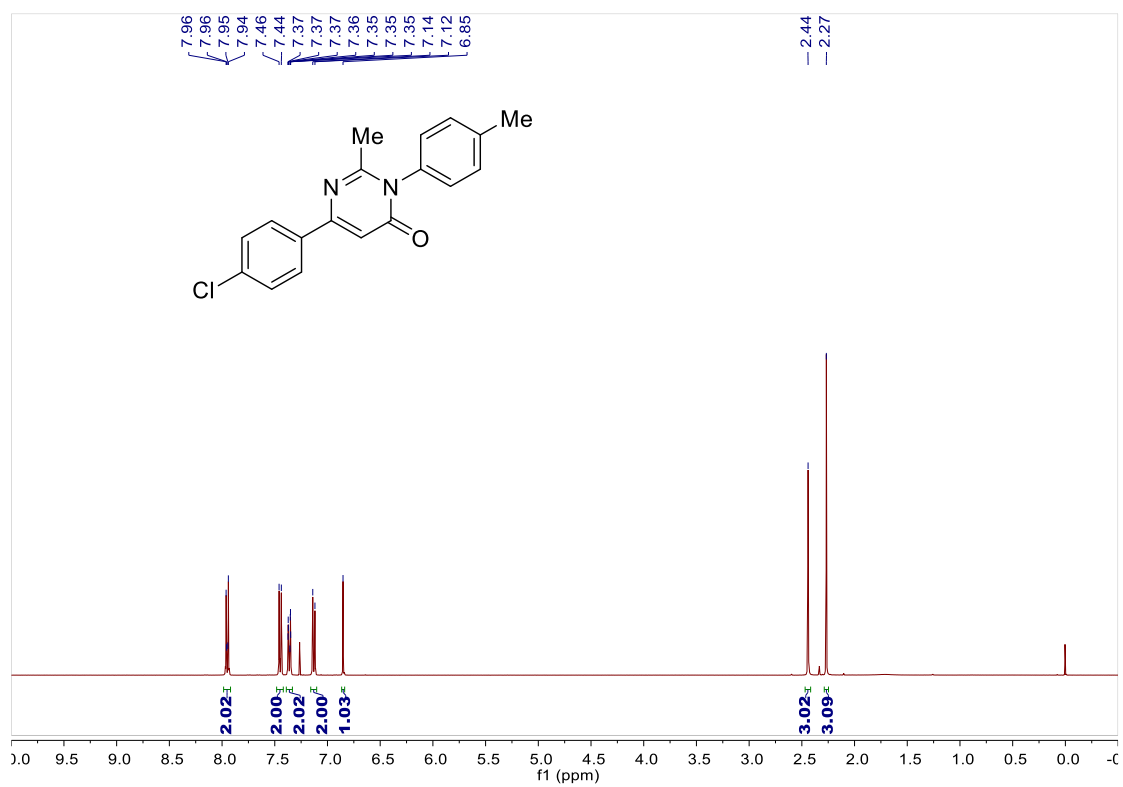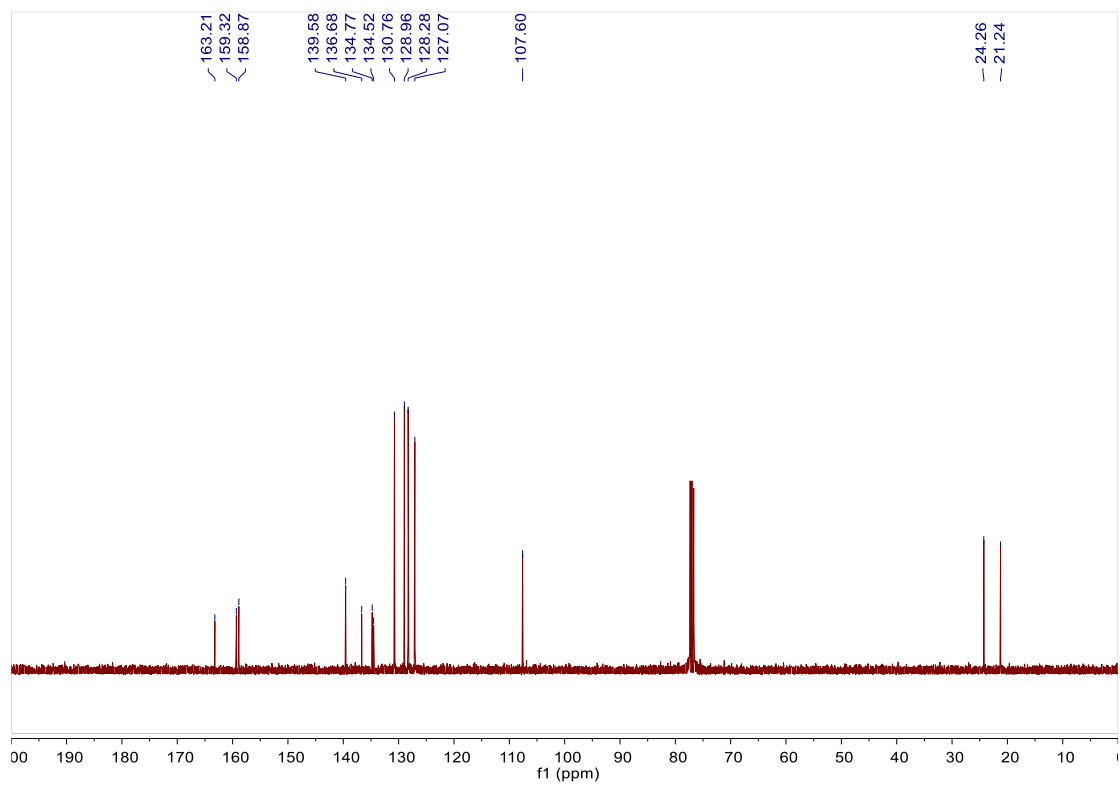

<sup>1</sup>H and <sup>13</sup>C NMR spectra for product 3fa (CDCl<sub>3</sub>)



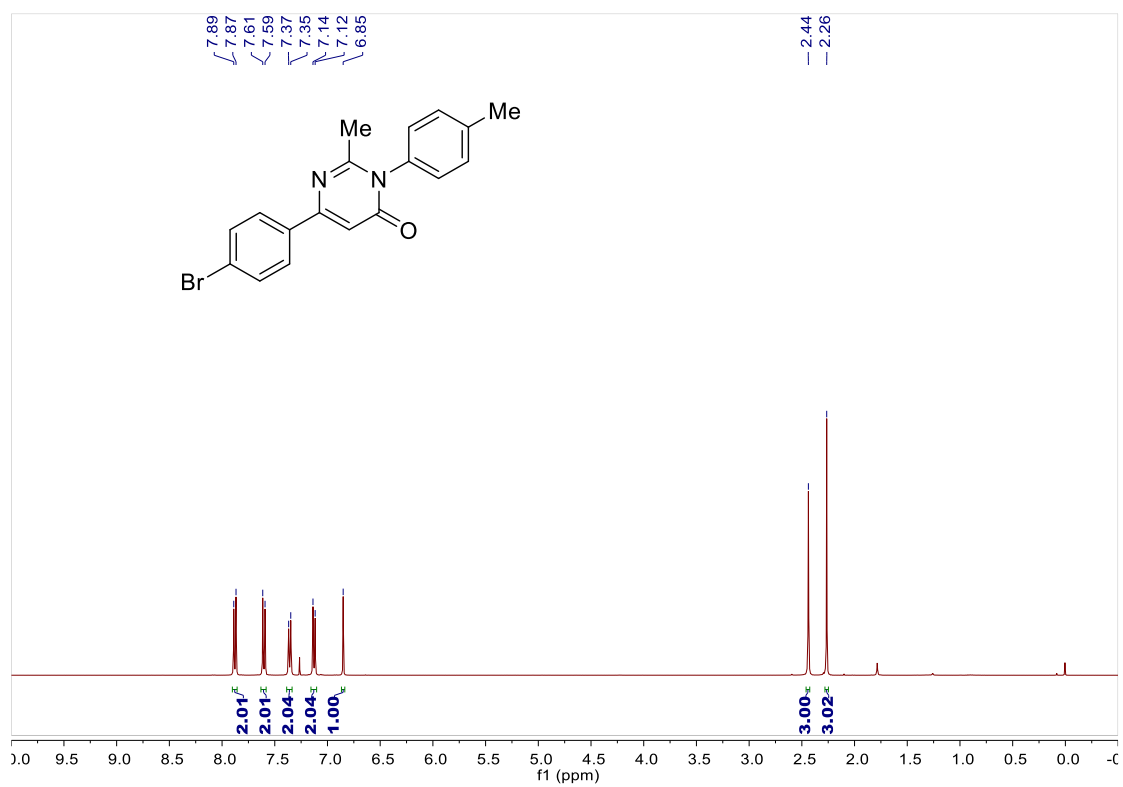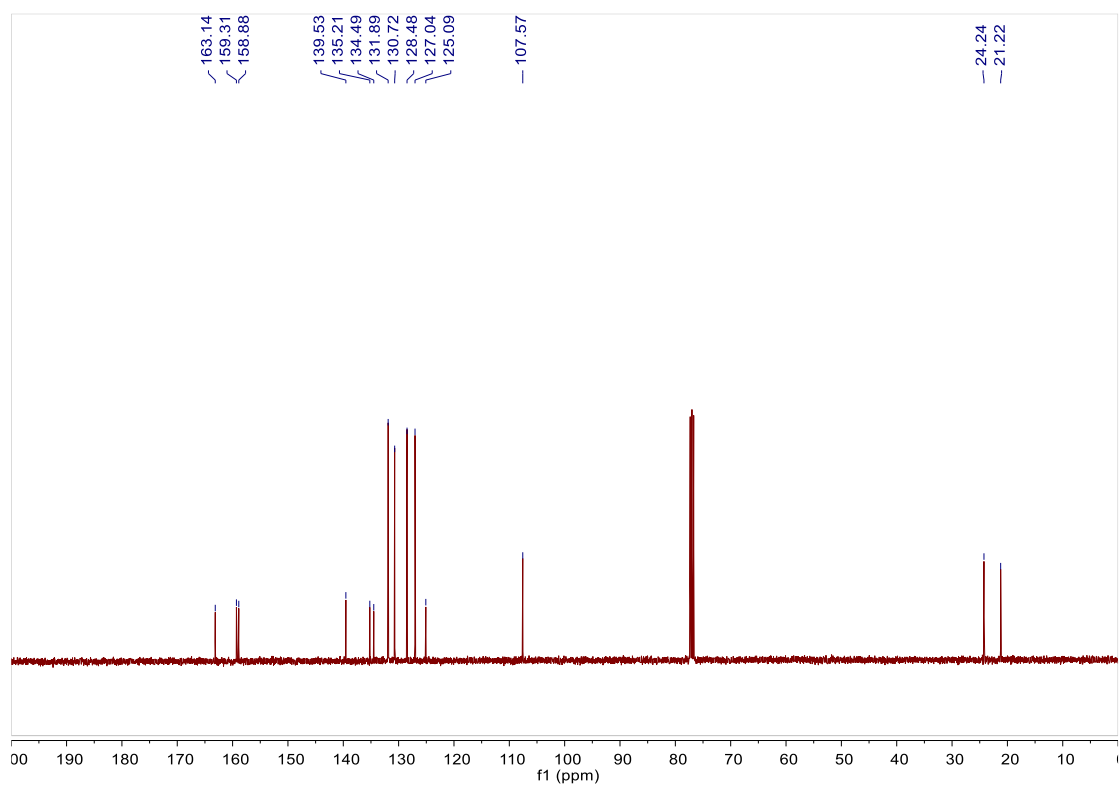

<sup>1</sup>H and <sup>13</sup>C NMR spectra for product 3ga (CDCl<sub>3</sub>)

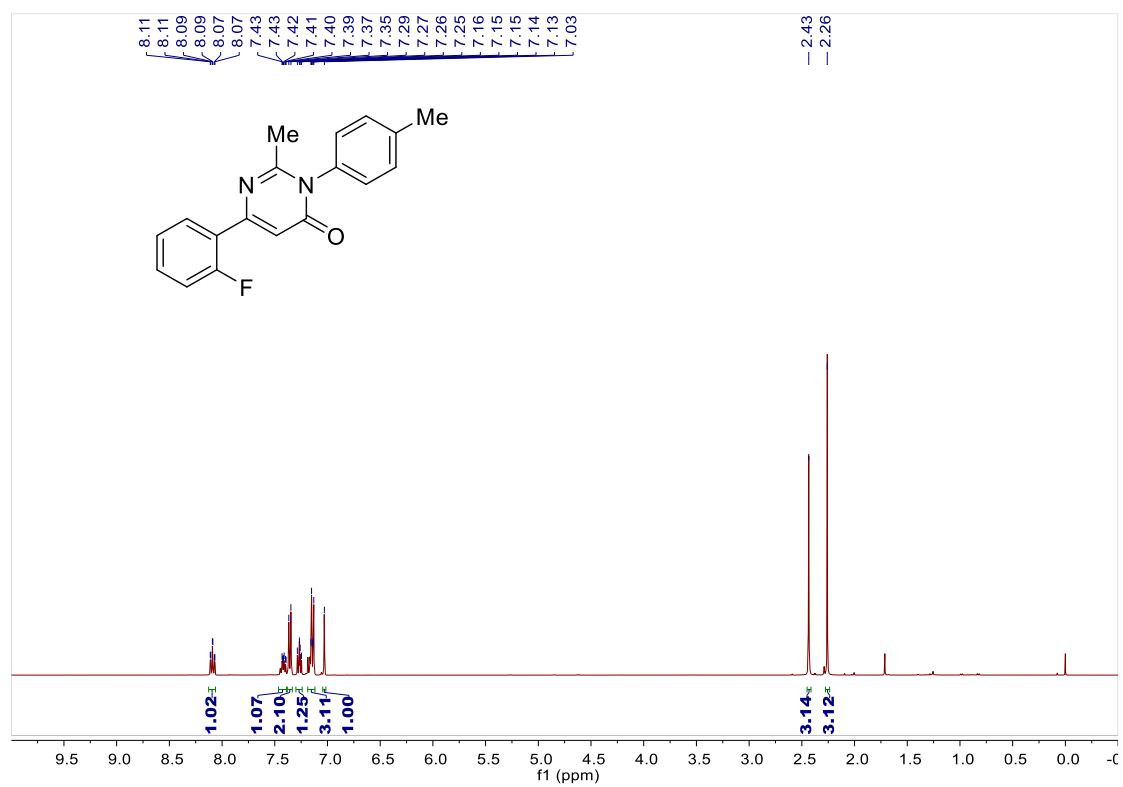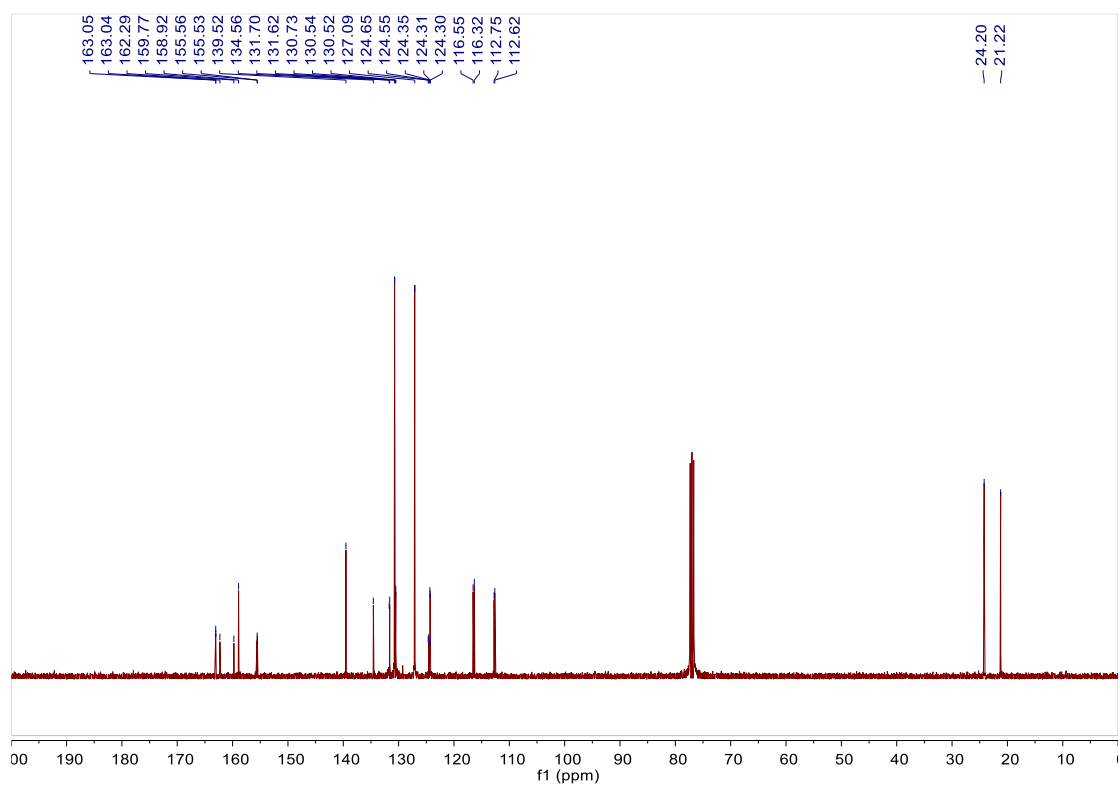

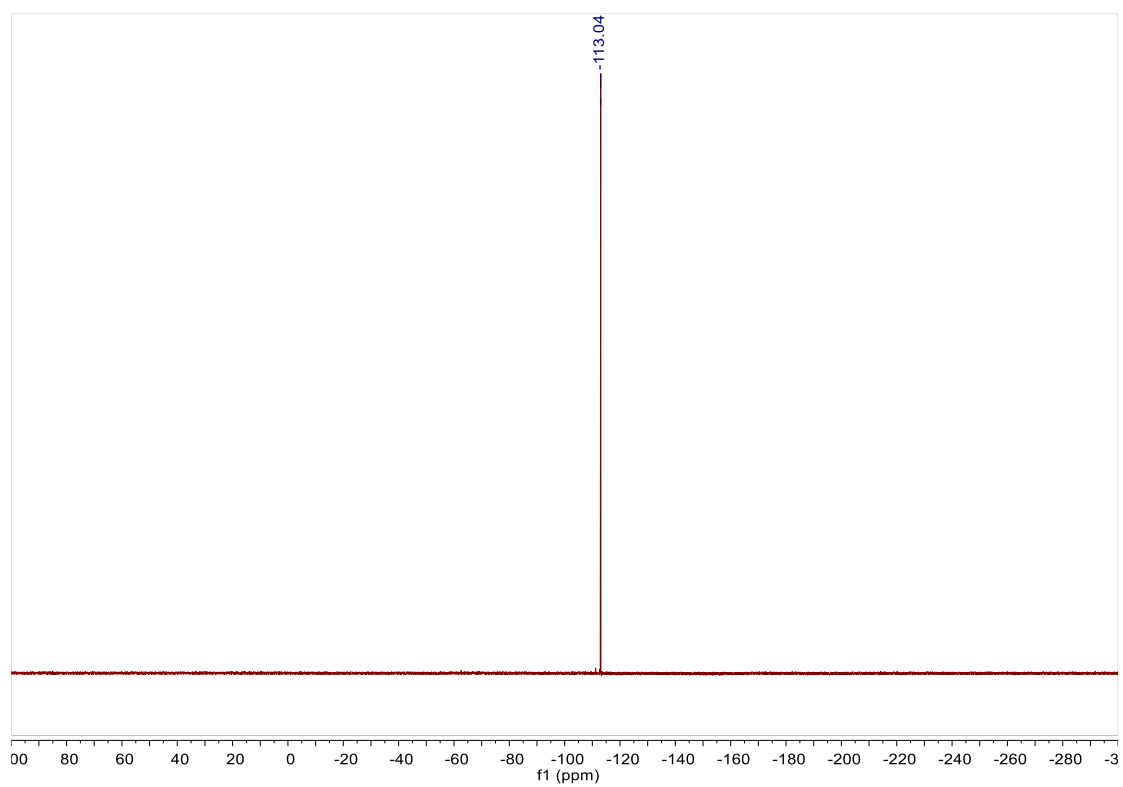

**$^1\text{H}$ ,  $^{13}\text{C}$  and  $^{19}\text{F}$  NMR spectra for product 3ha ( $\text{CDCl}_3$ )**

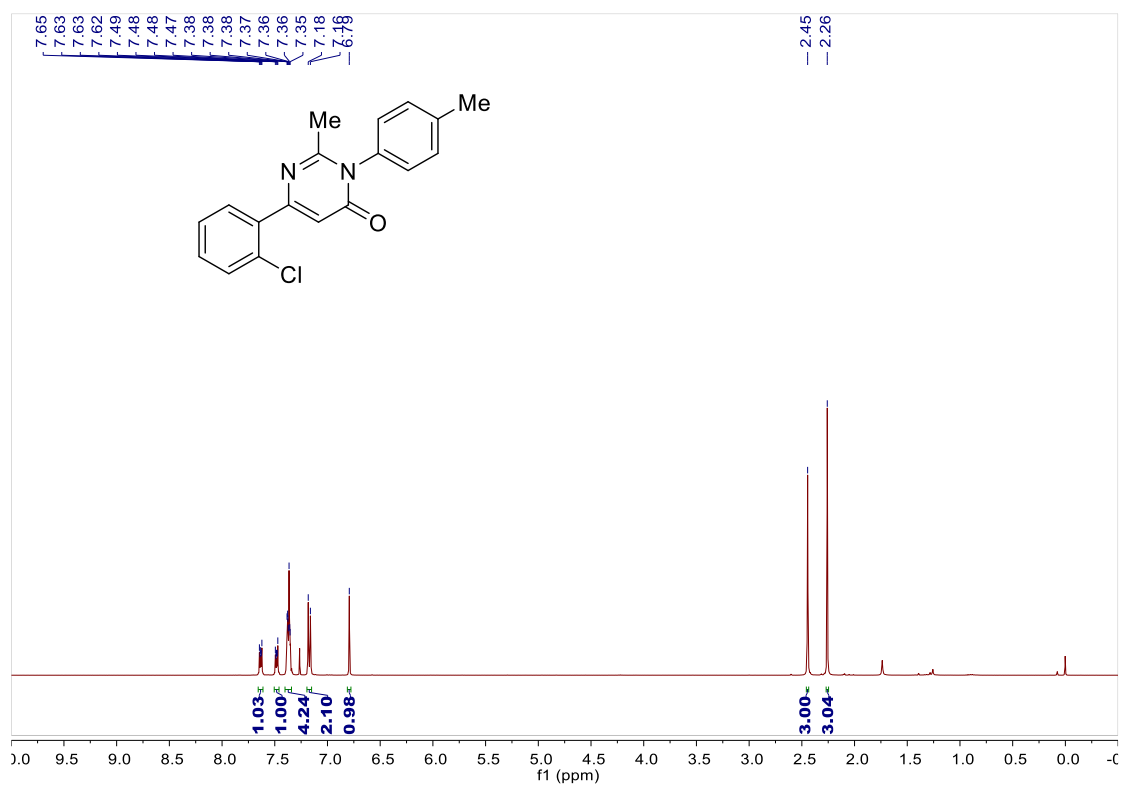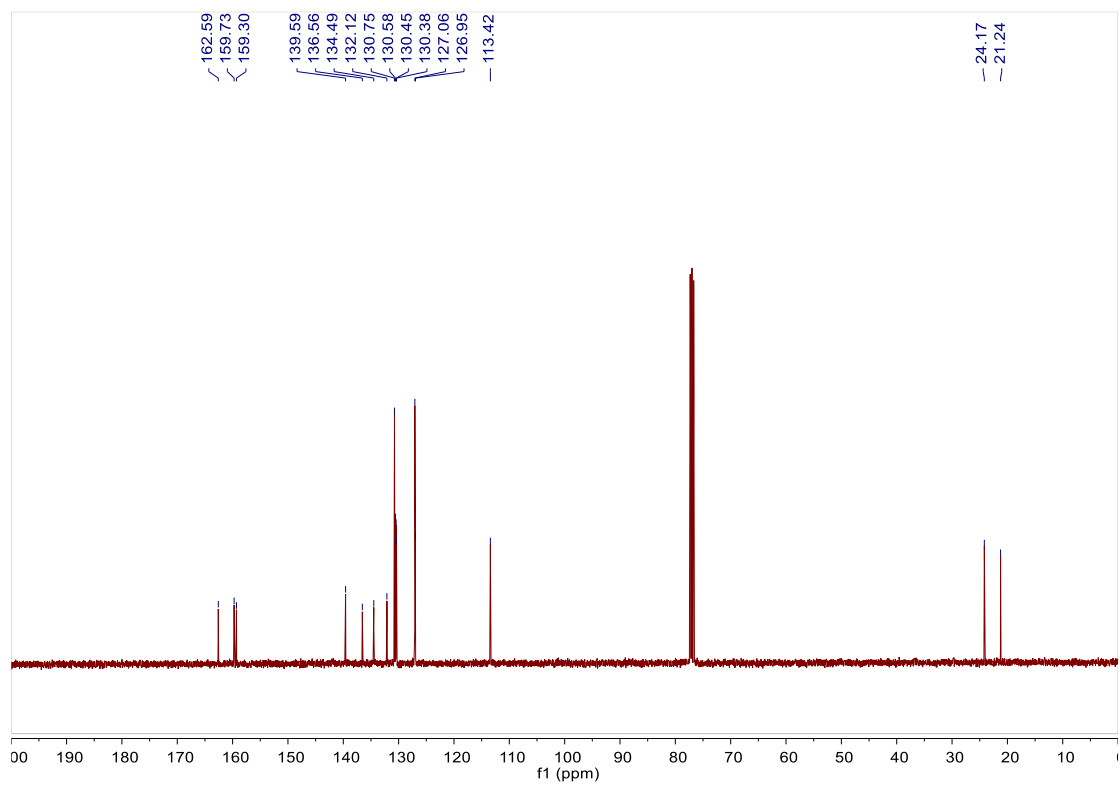

<sup>1</sup>H and <sup>13</sup>C NMR spectra for product 3ia (CDCl<sub>3</sub>)

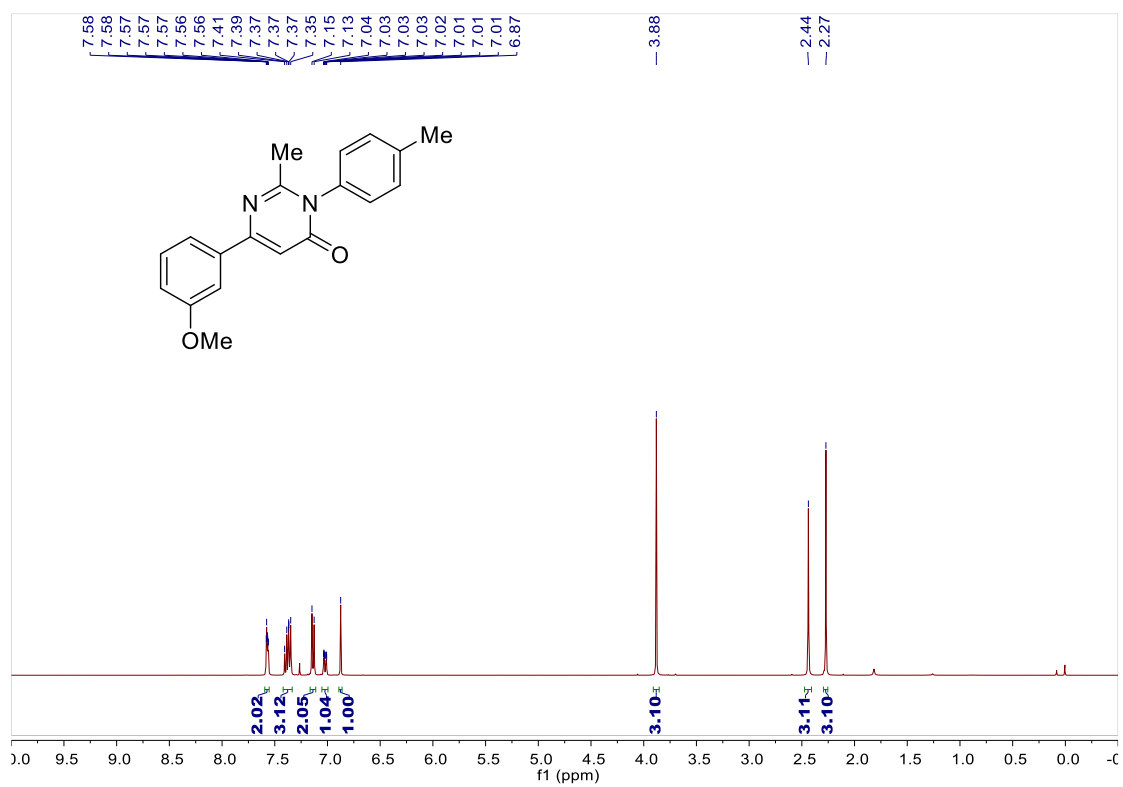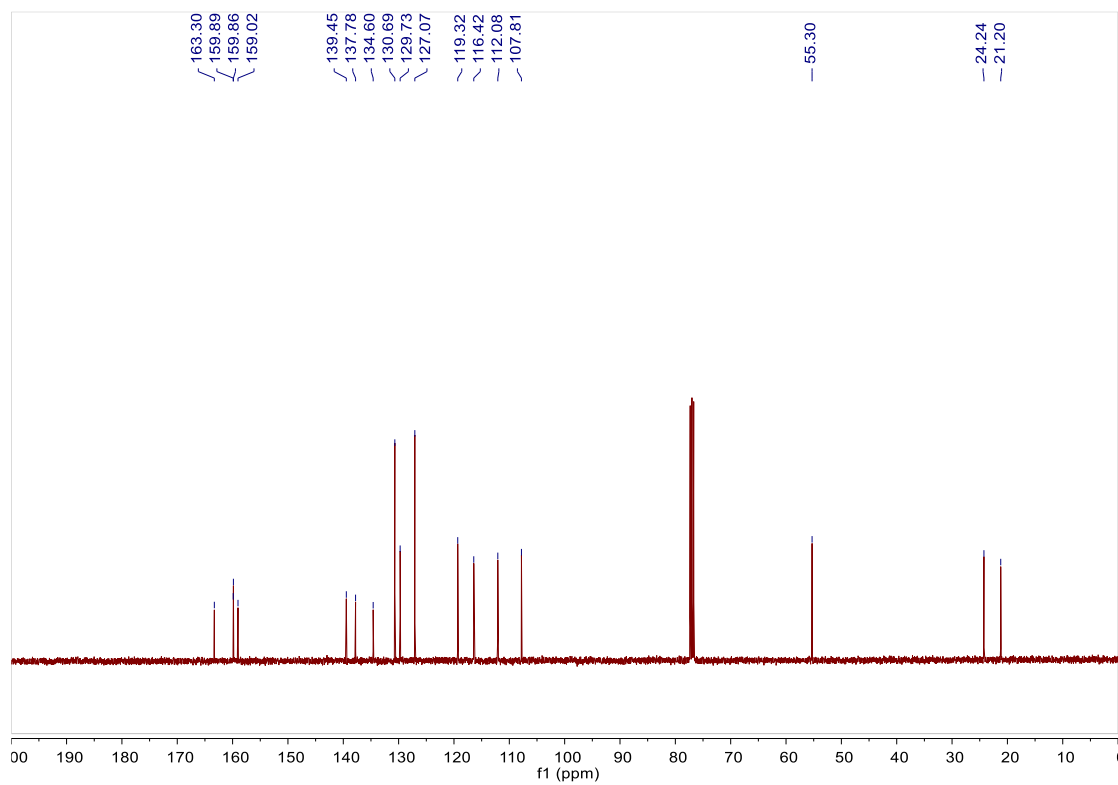

**<sup>1</sup>H and <sup>13</sup>C NMR spectra for product 3ja (CDCl<sub>3</sub>)**

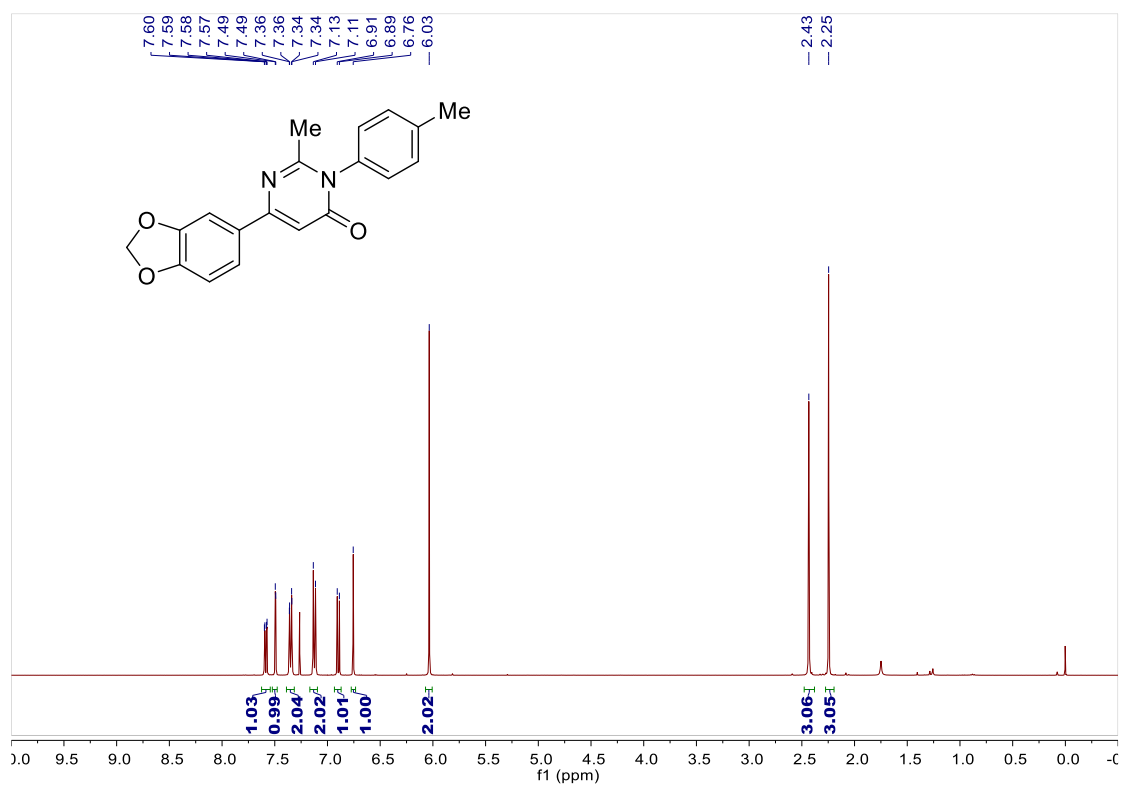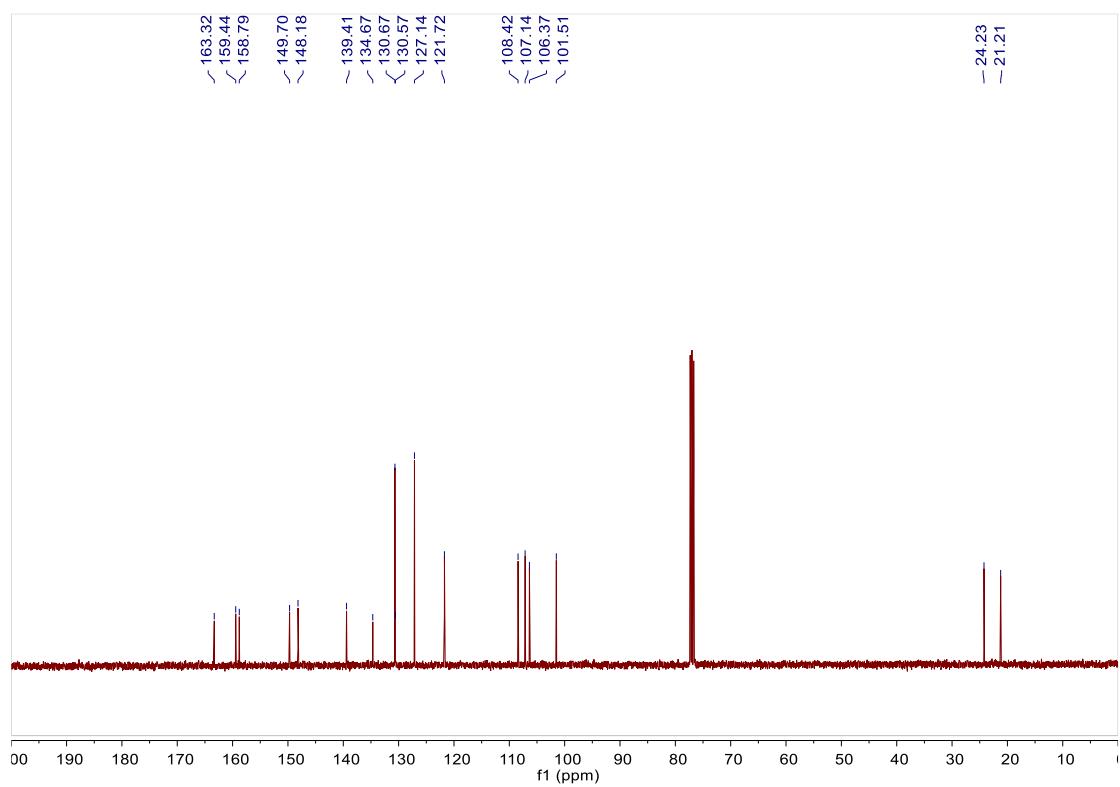

**<sup>1</sup>H and <sup>13</sup>C NMR spectra for product 3ka (CDCl<sub>3</sub>)**

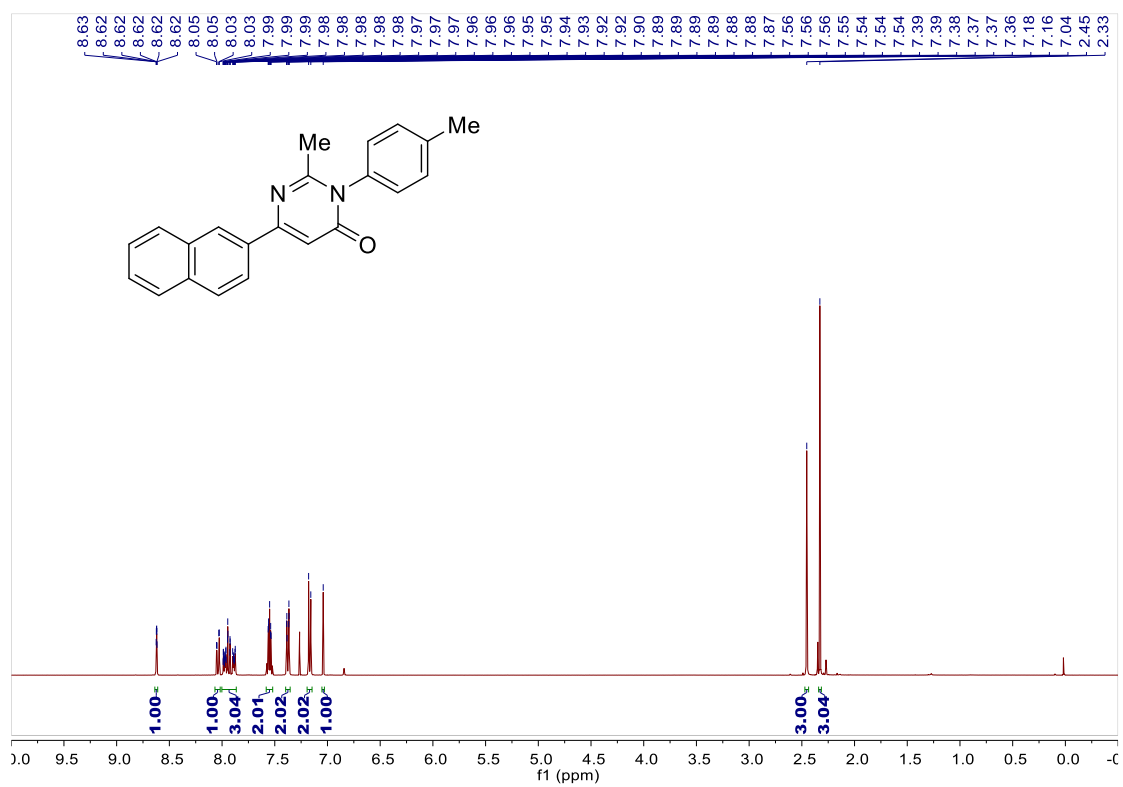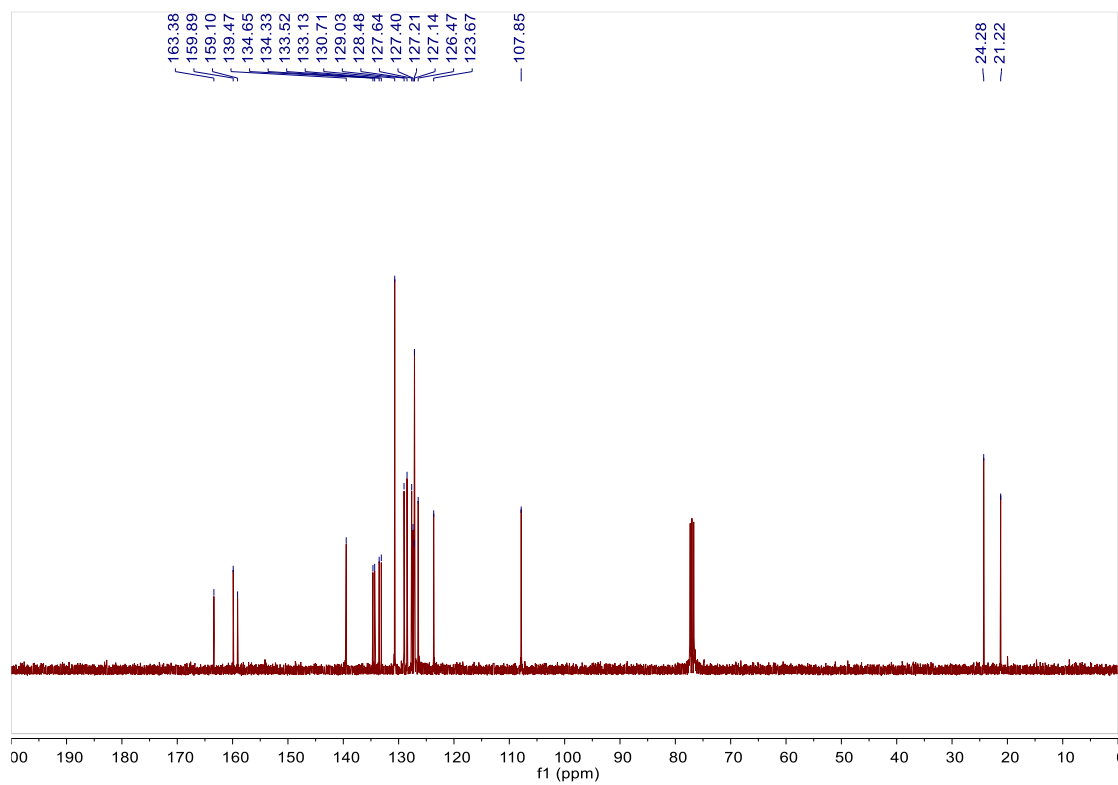

**<sup>1</sup>H and <sup>13</sup>C NMR spectra for product 3la (CDCl<sub>3</sub>)**

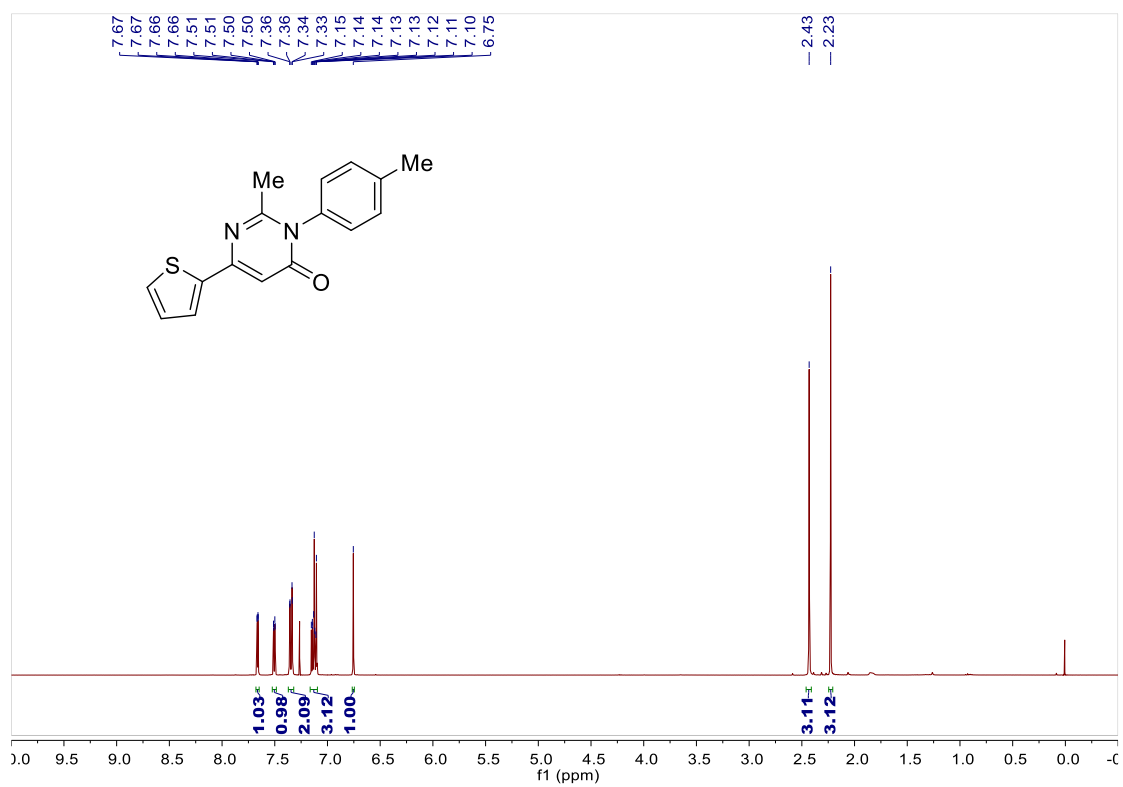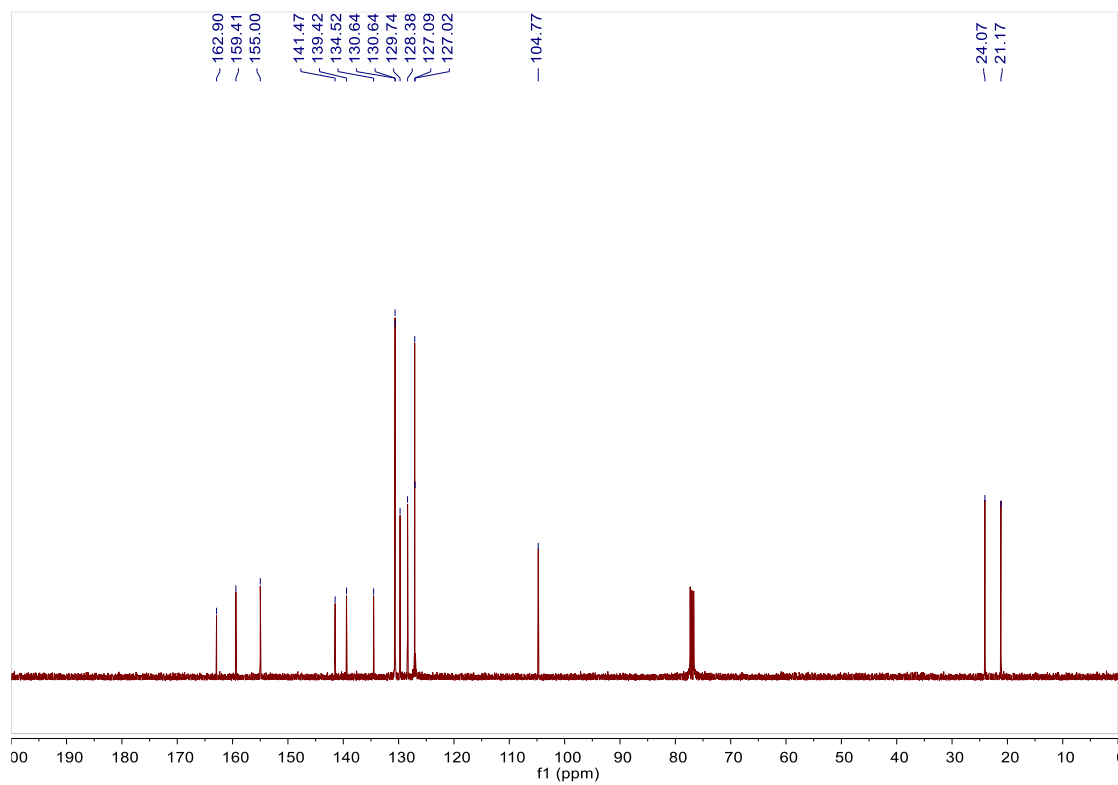

**<sup>1</sup>H and <sup>13</sup>C NMR spectra for product 3ma (CDCl<sub>3</sub>)**



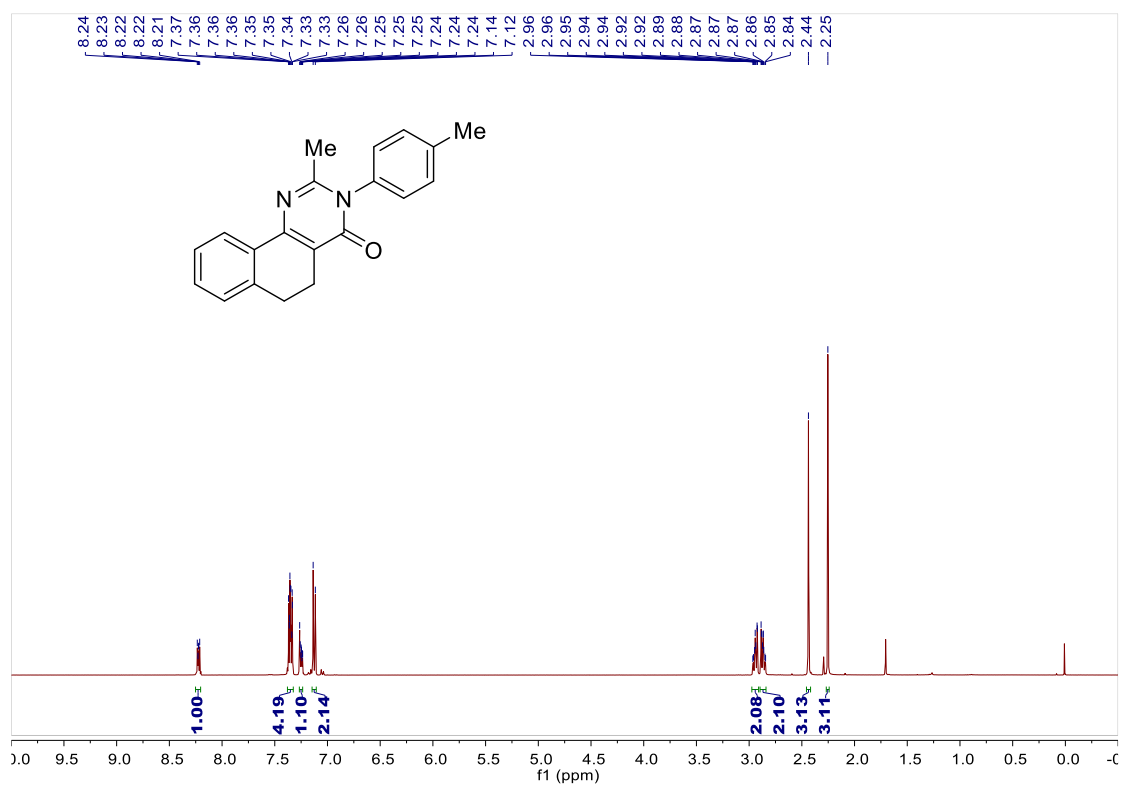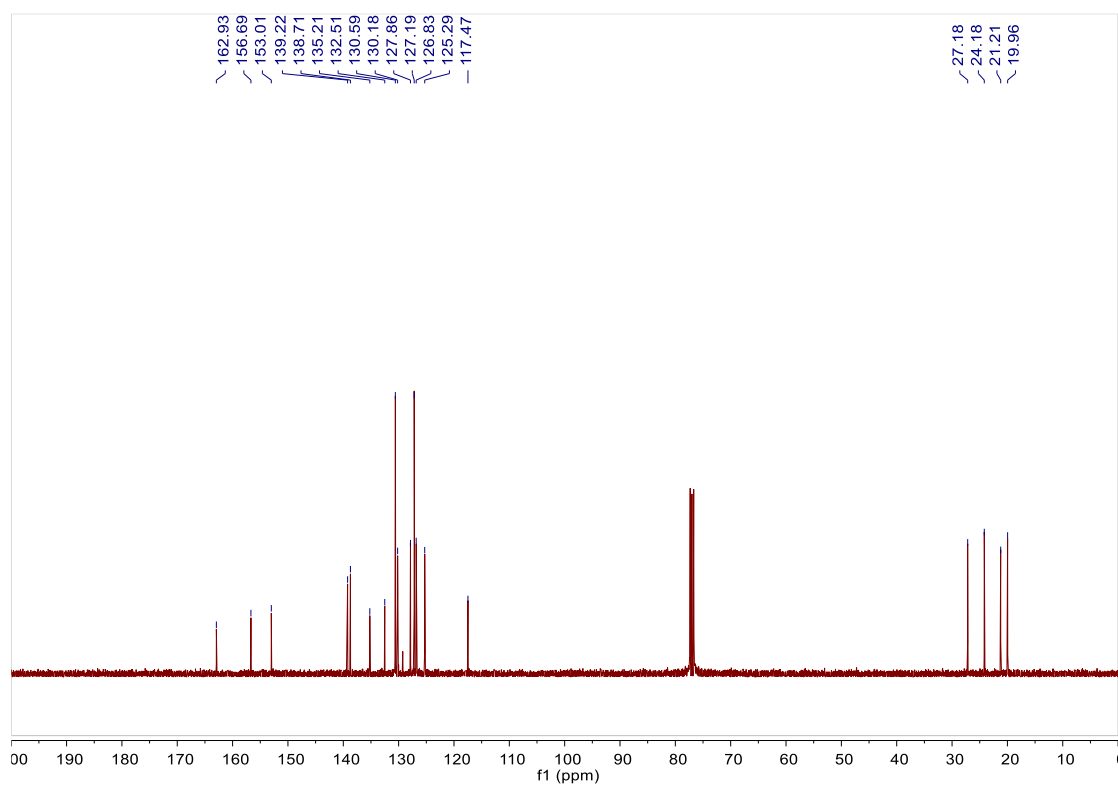

**<sup>1</sup>H and <sup>13</sup>C NMR spectra for product 3na (CDCl<sub>3</sub>)**

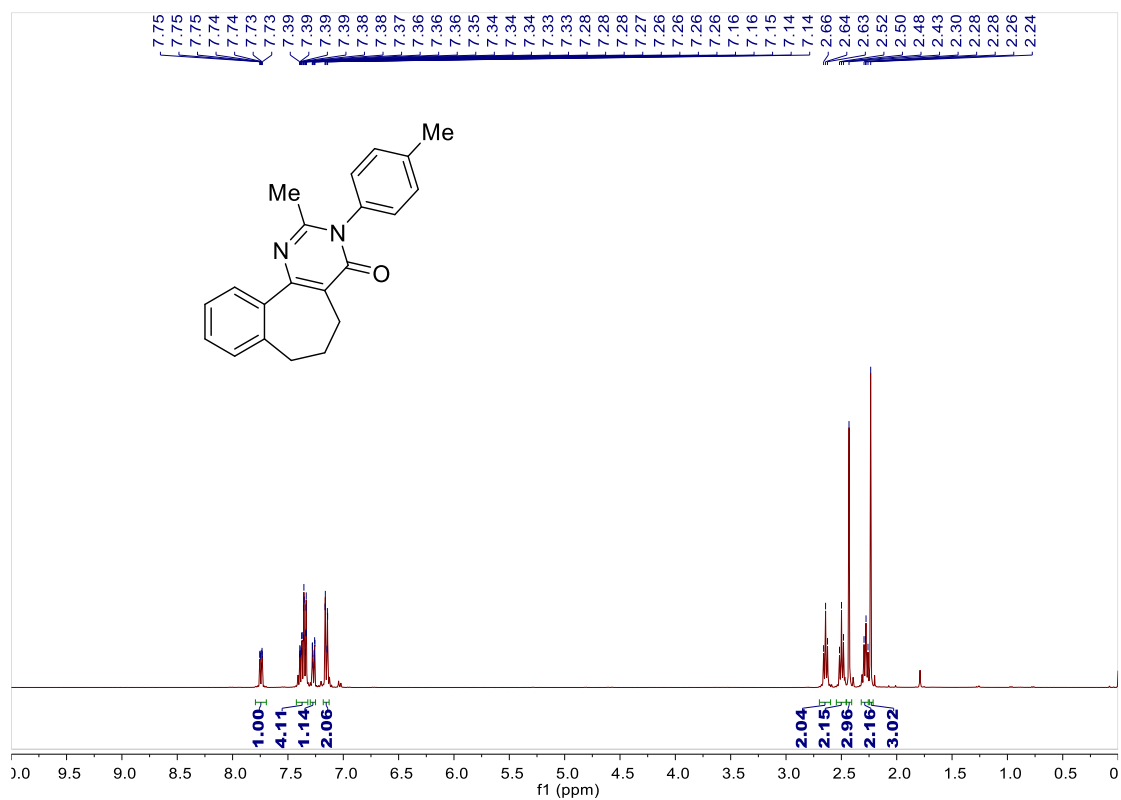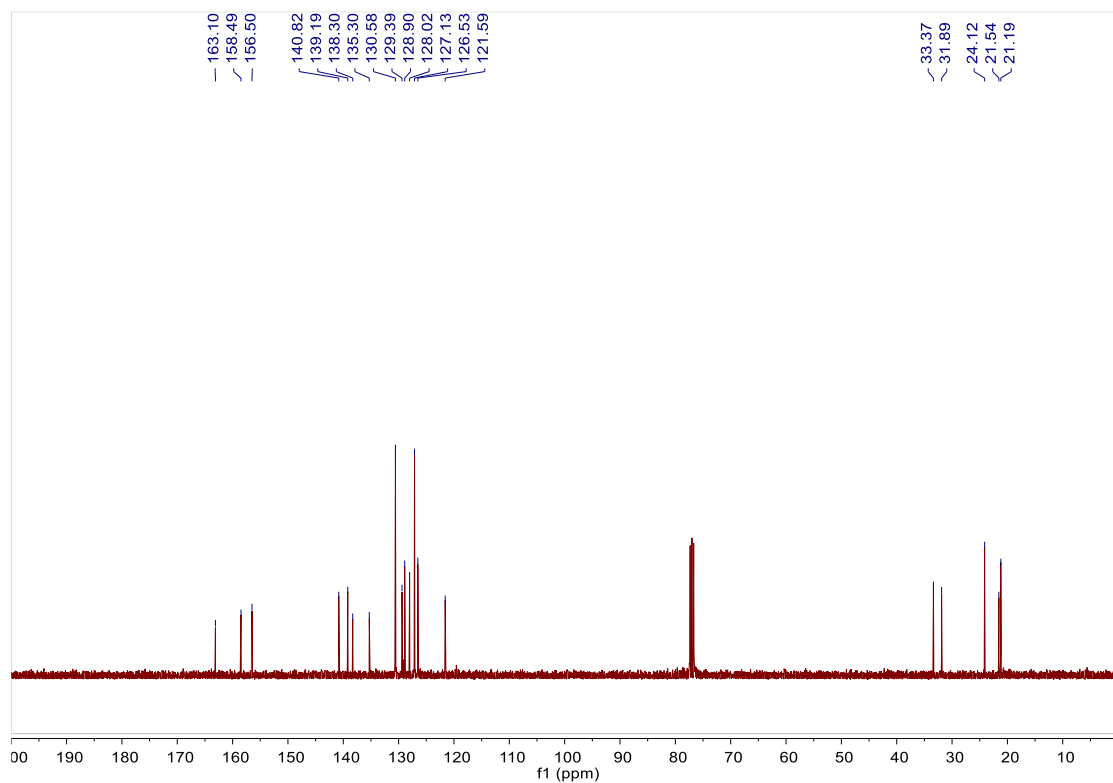

**<sup>1</sup>H and <sup>13</sup>C NMR spectra for product 30a (CDCl<sub>3</sub>)**

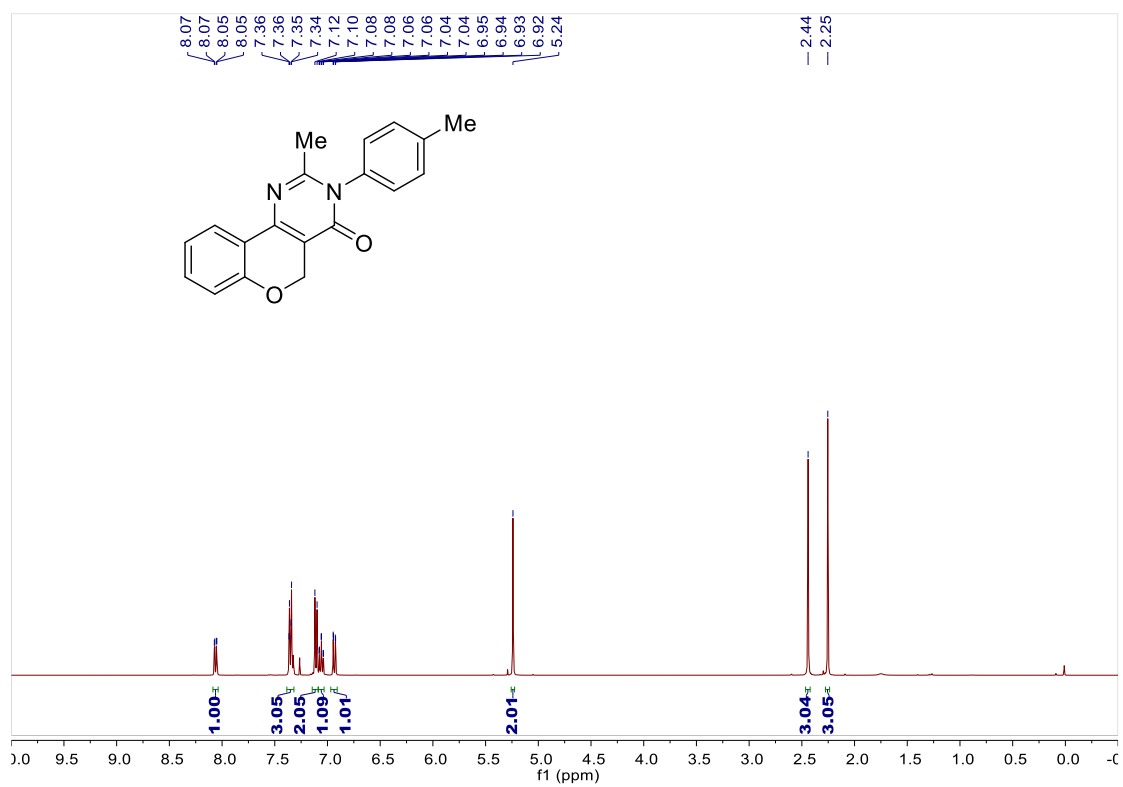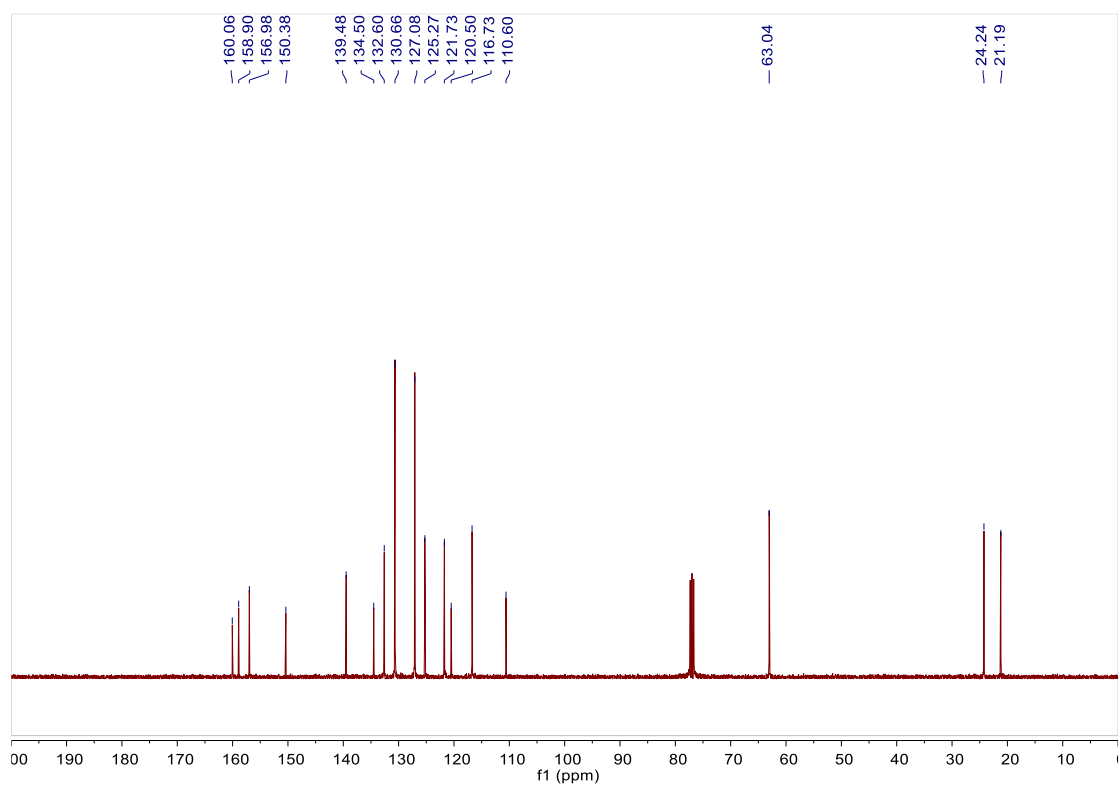

**<sup>1</sup>H and <sup>13</sup>C NMR spectra for product 3pa (CDCl<sub>3</sub>)**

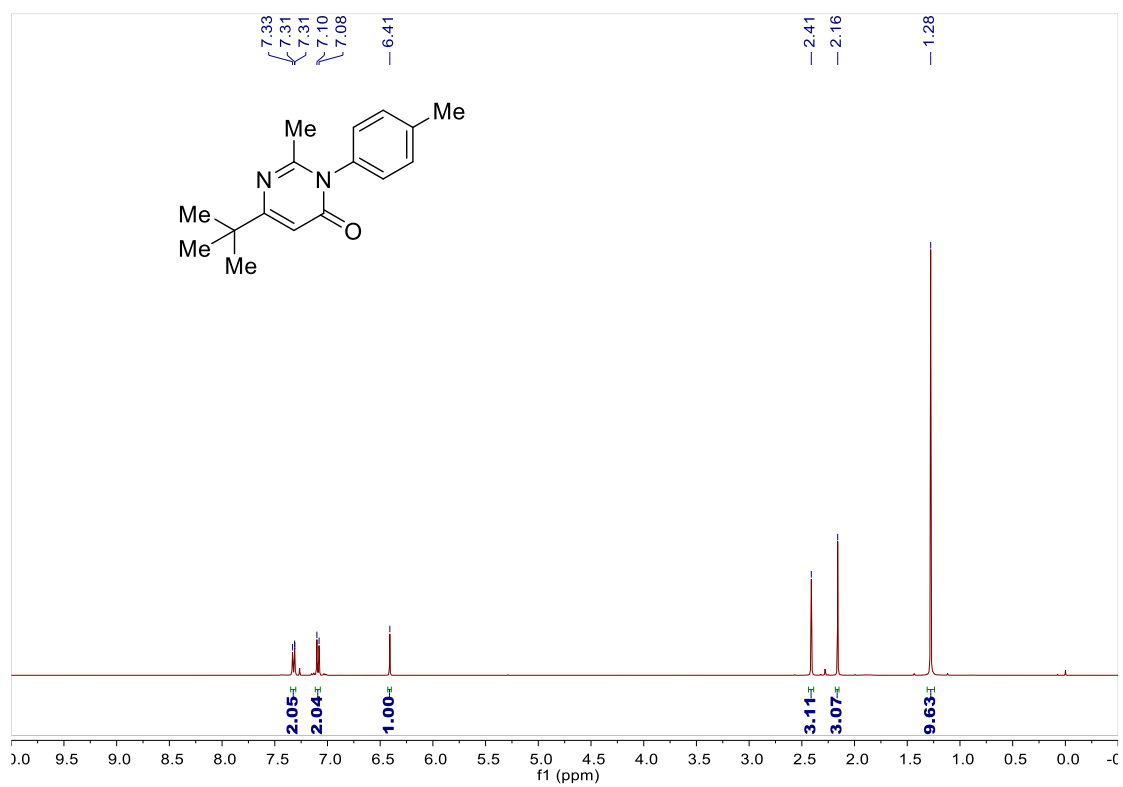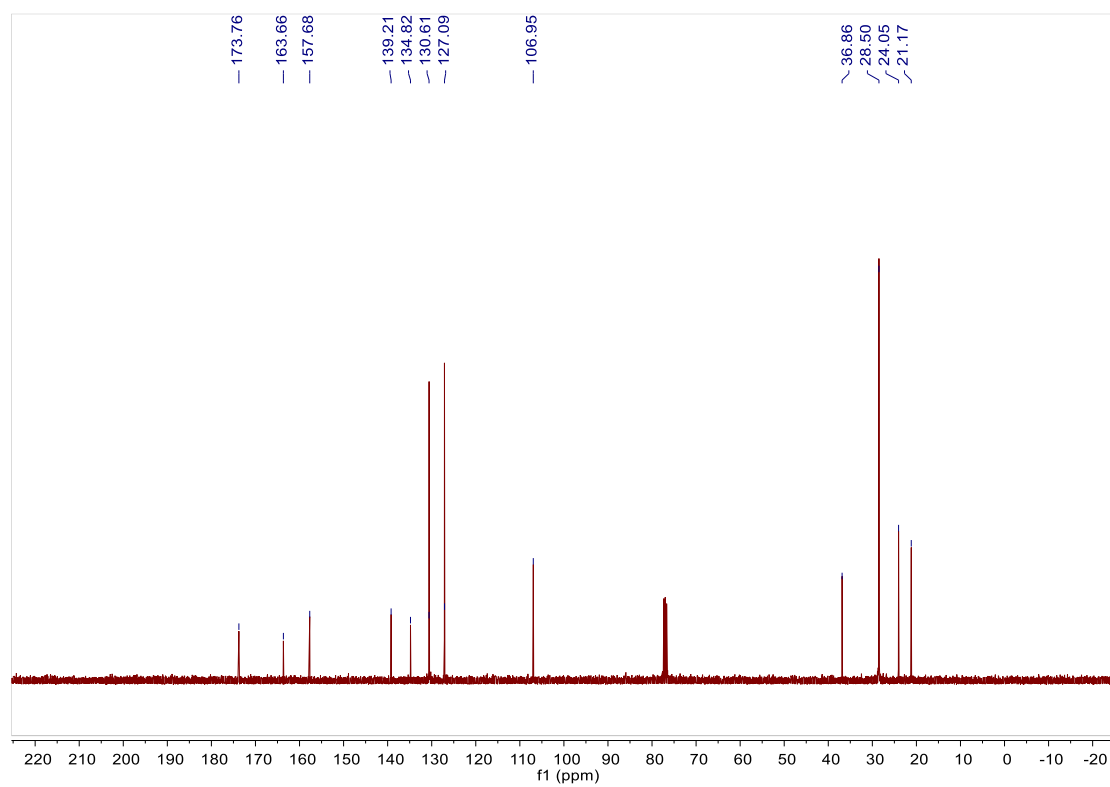

**<sup>1</sup>H and <sup>13</sup>C NMR spectra for product 3qa (CDCl<sub>3</sub>)**

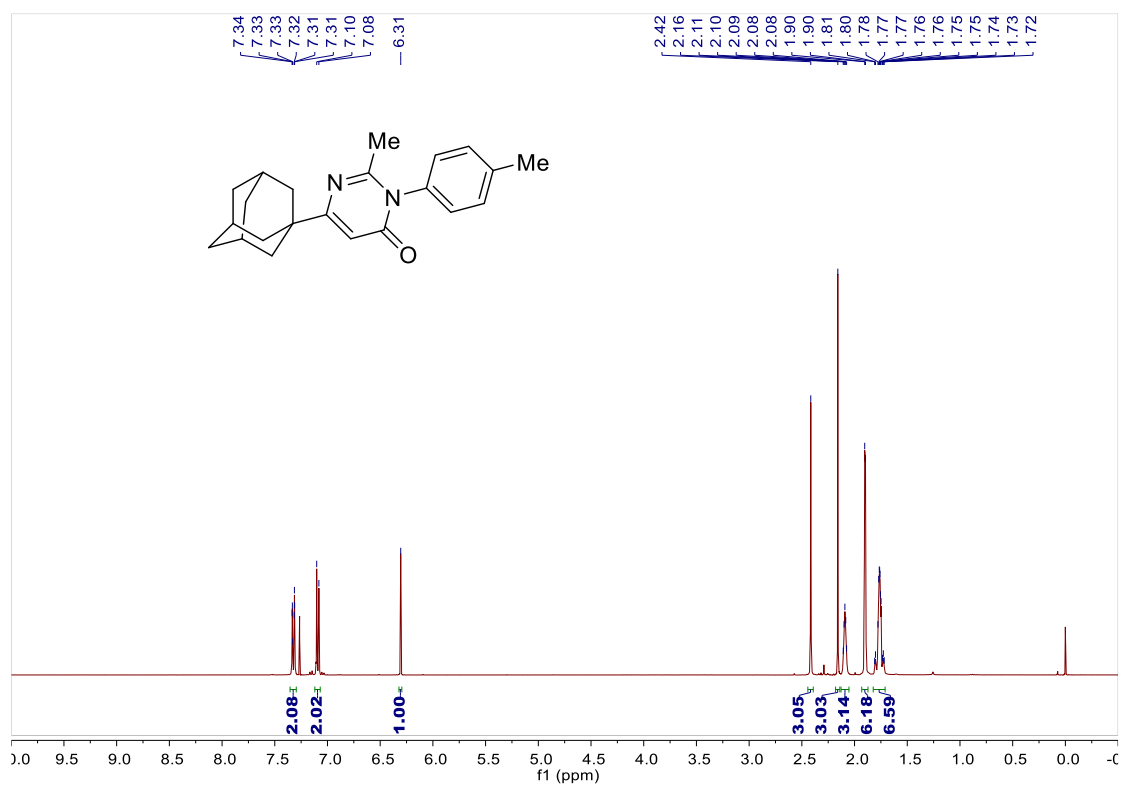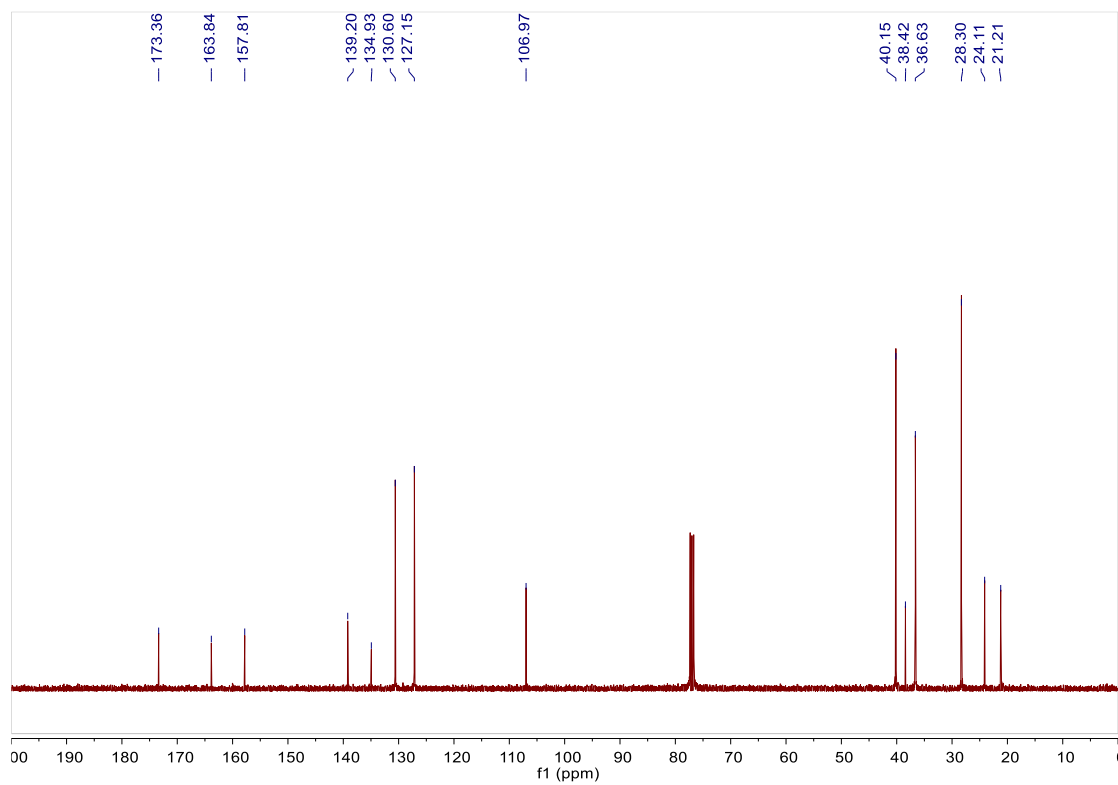

**$^1\text{H}$  and  $^{13}\text{C}$  NMR spectra for product 3ra ( $\text{CDCl}_3$ )**

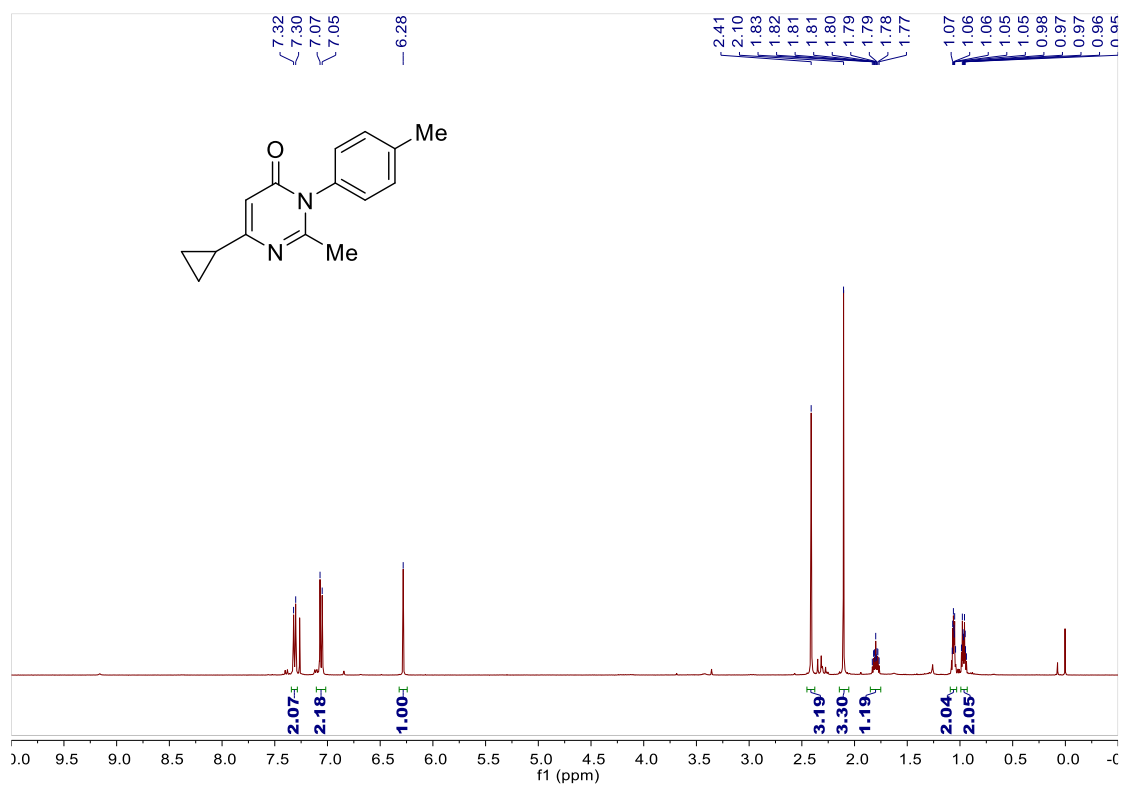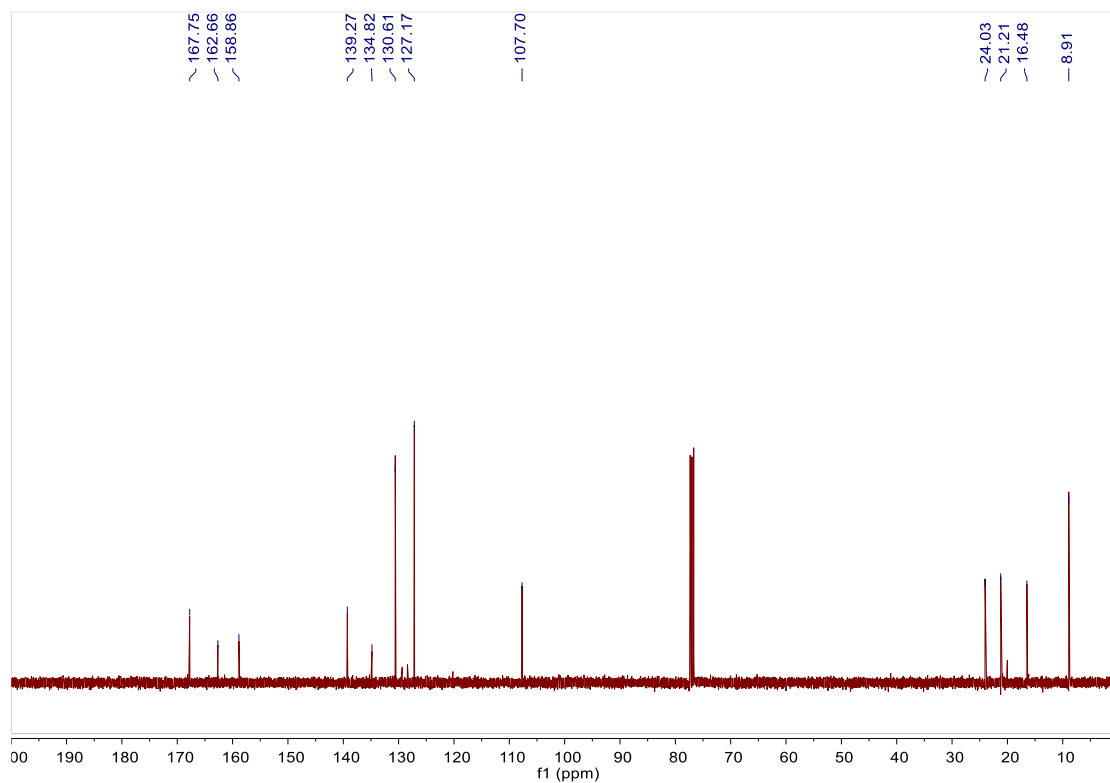

**<sup>1</sup>H and <sup>13</sup>C NMR spectra for product 3sa (CDCl<sub>3</sub>)**

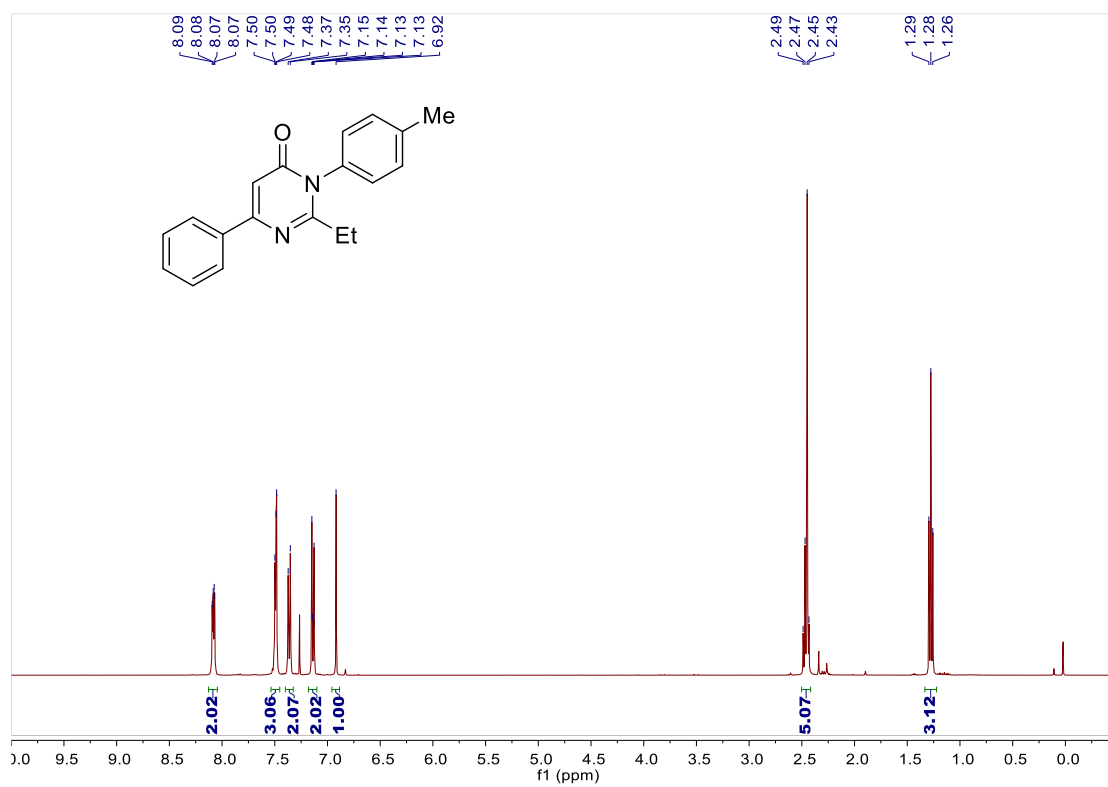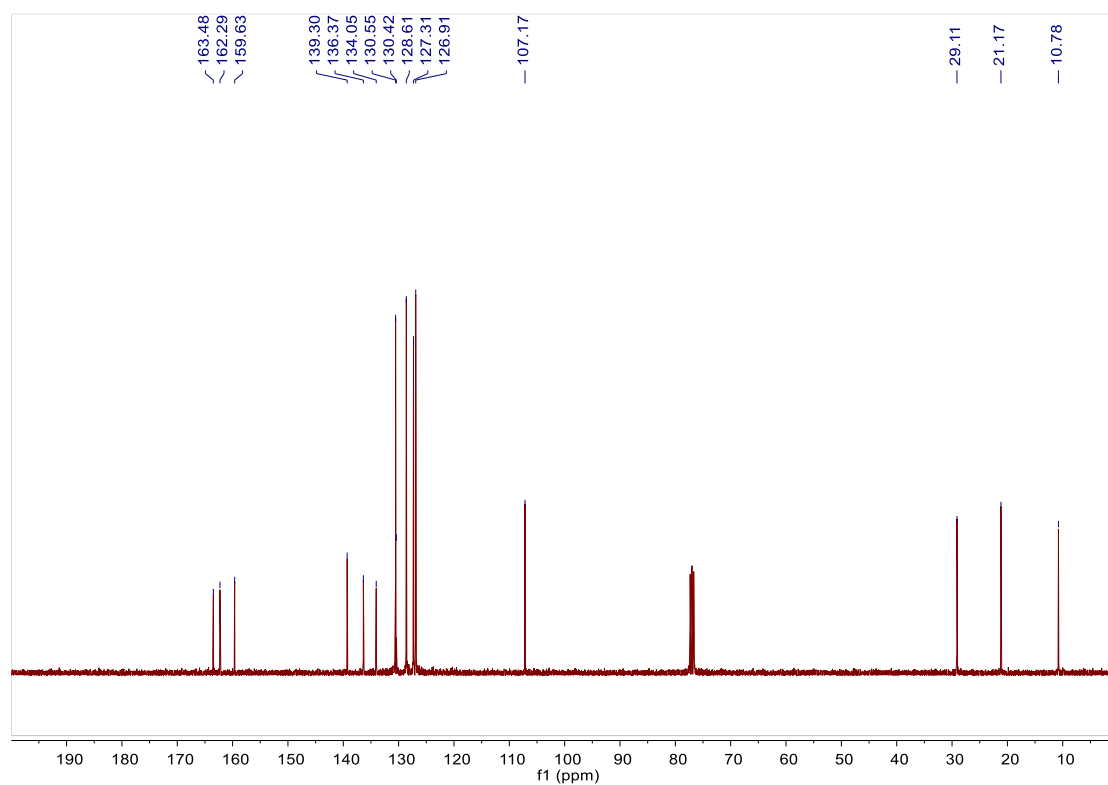

**<sup>1</sup>H and <sup>13</sup>C NMR spectra for product 3ta (CDCl<sub>3</sub>)**

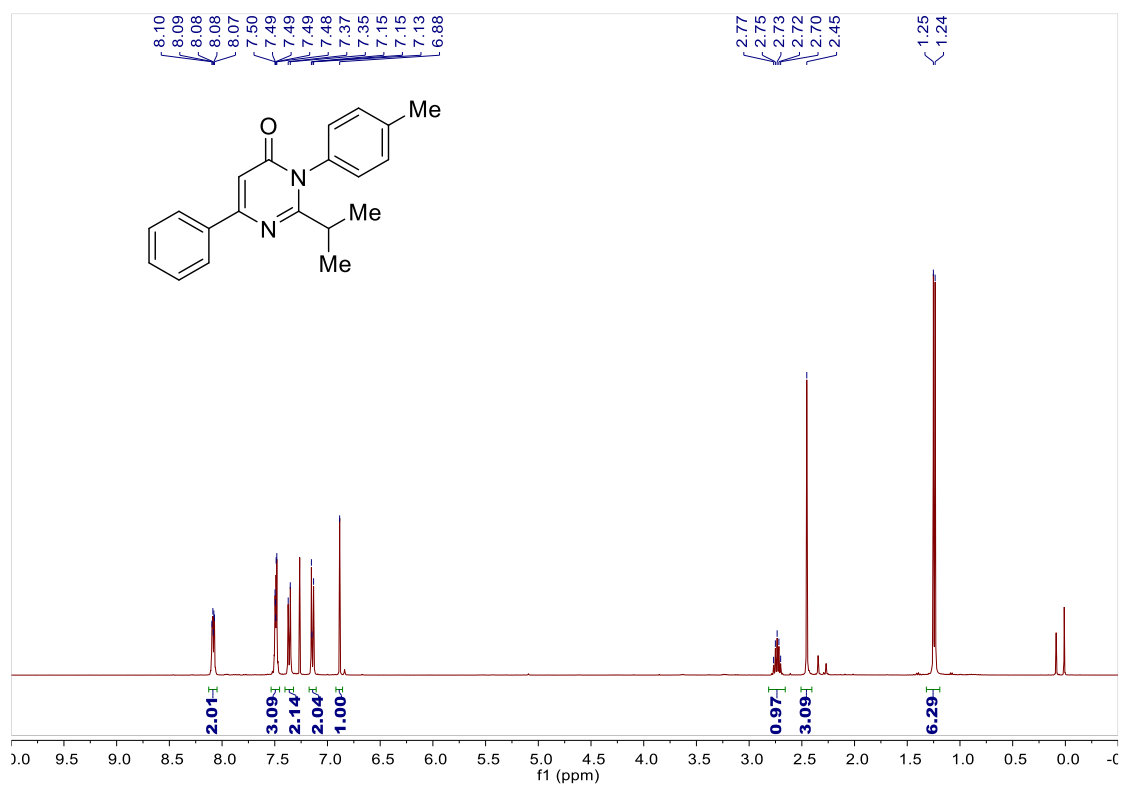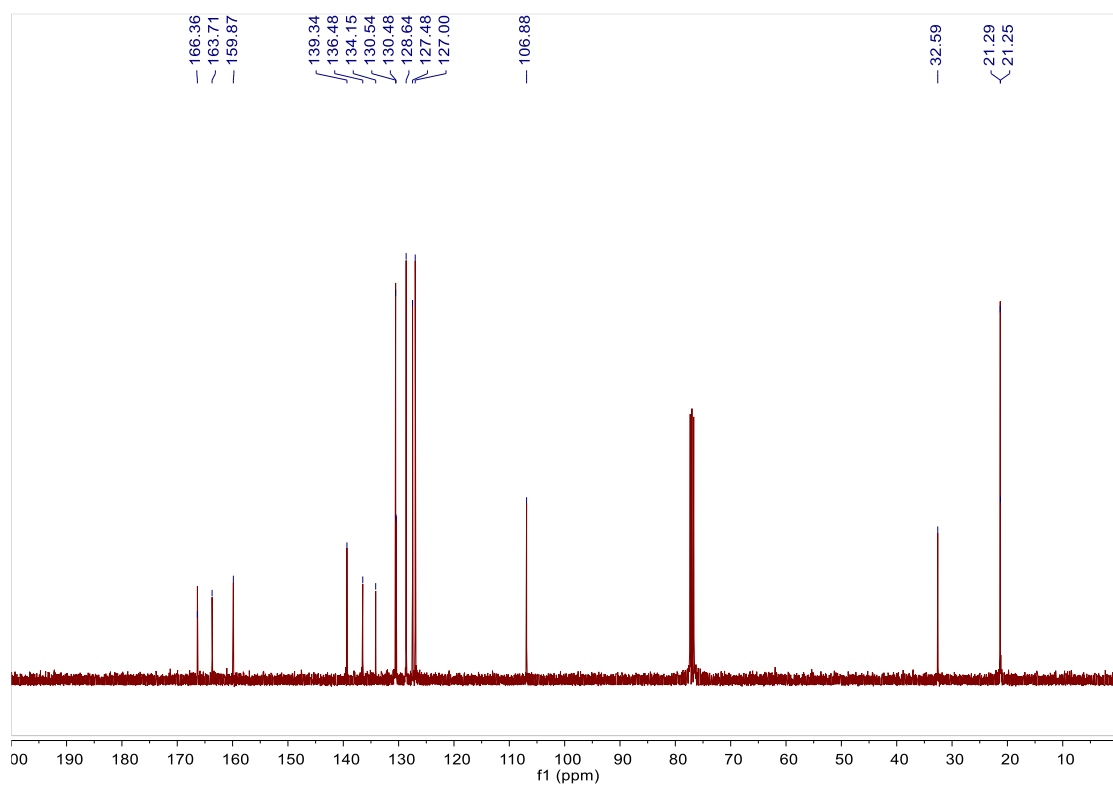

**<sup>1</sup>H and <sup>13</sup>C NMR spectra for product 3ua (CDCl<sub>3</sub>)**



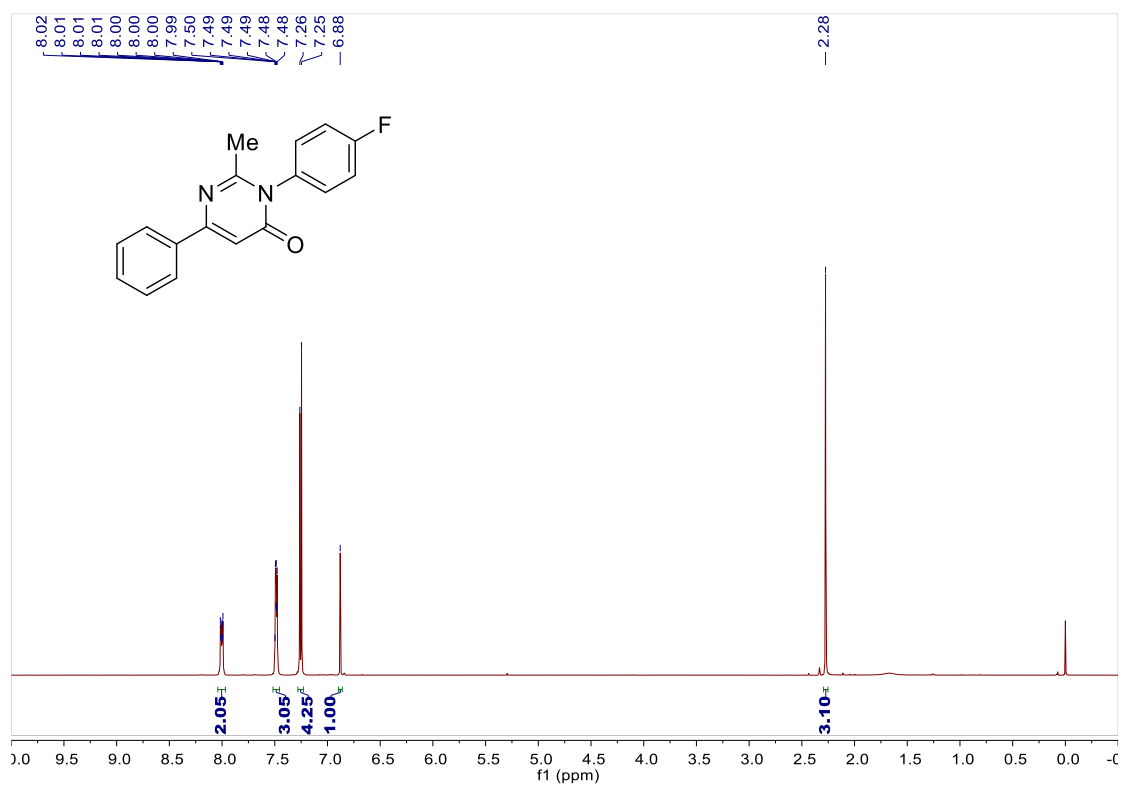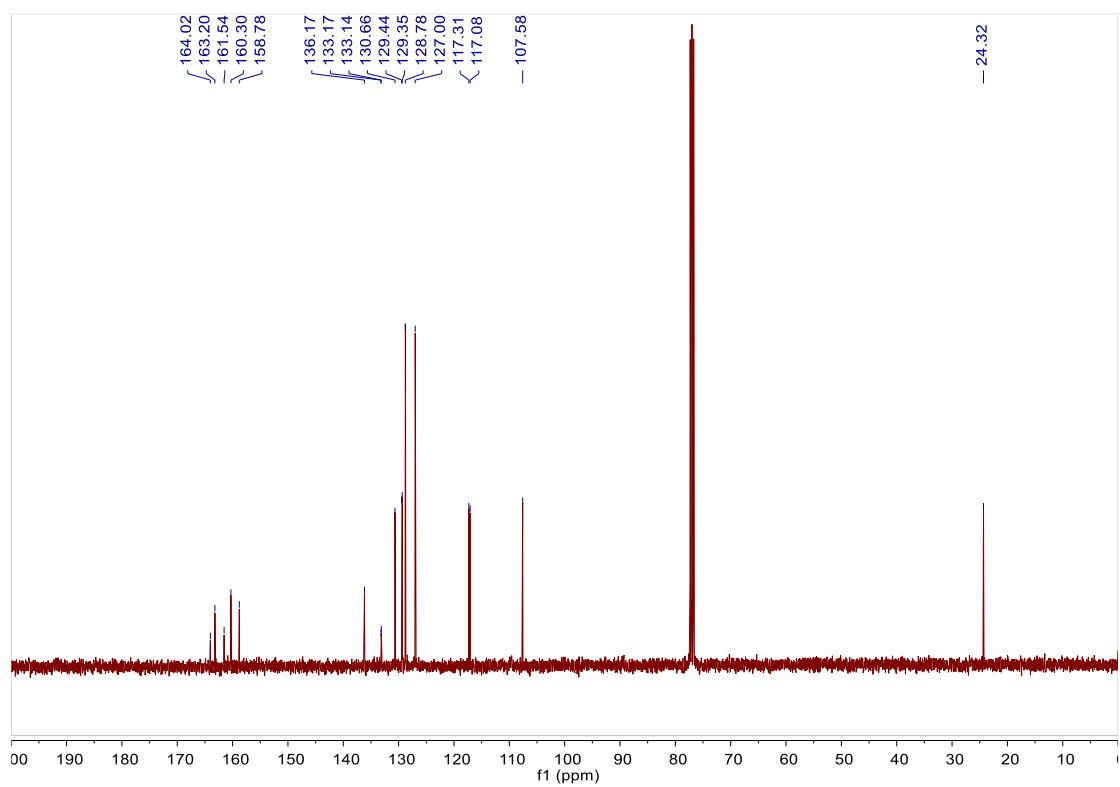

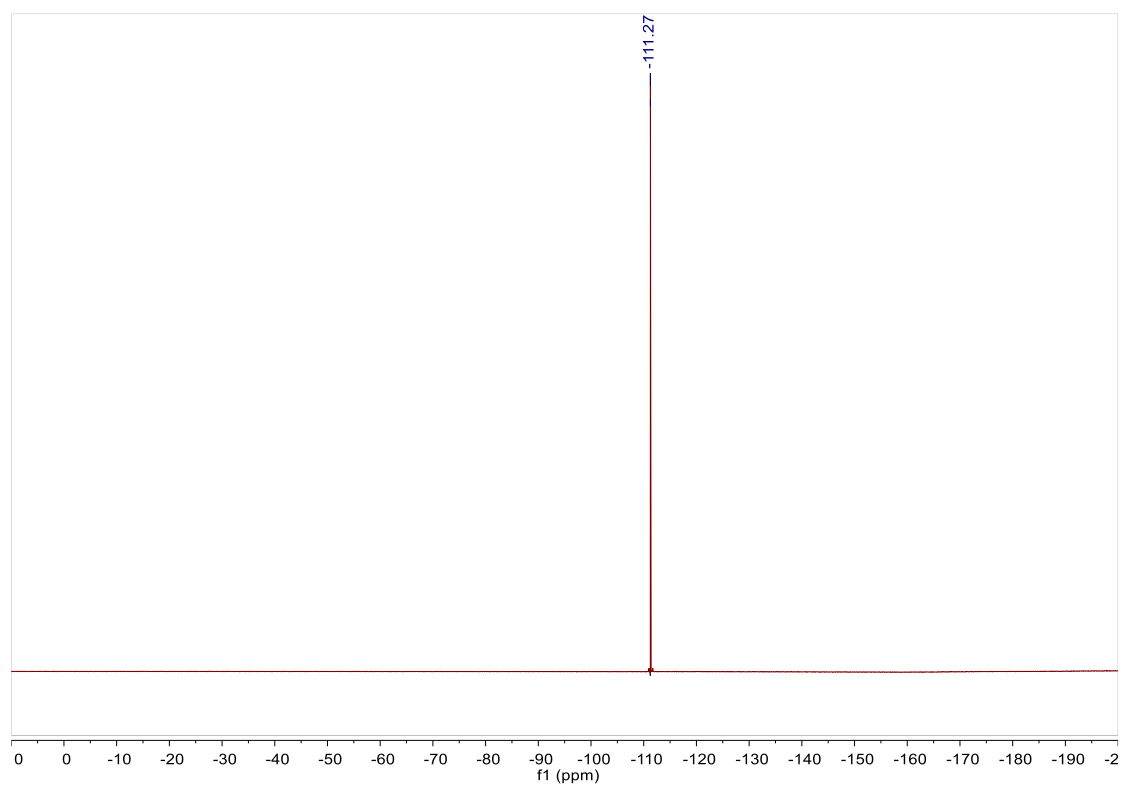

**$^1\text{H}$ ,  $^{13}\text{C}$  and  $^{19}\text{F}$  NMR spectra for product 3ab ( $\text{CDCl}_3$ )**

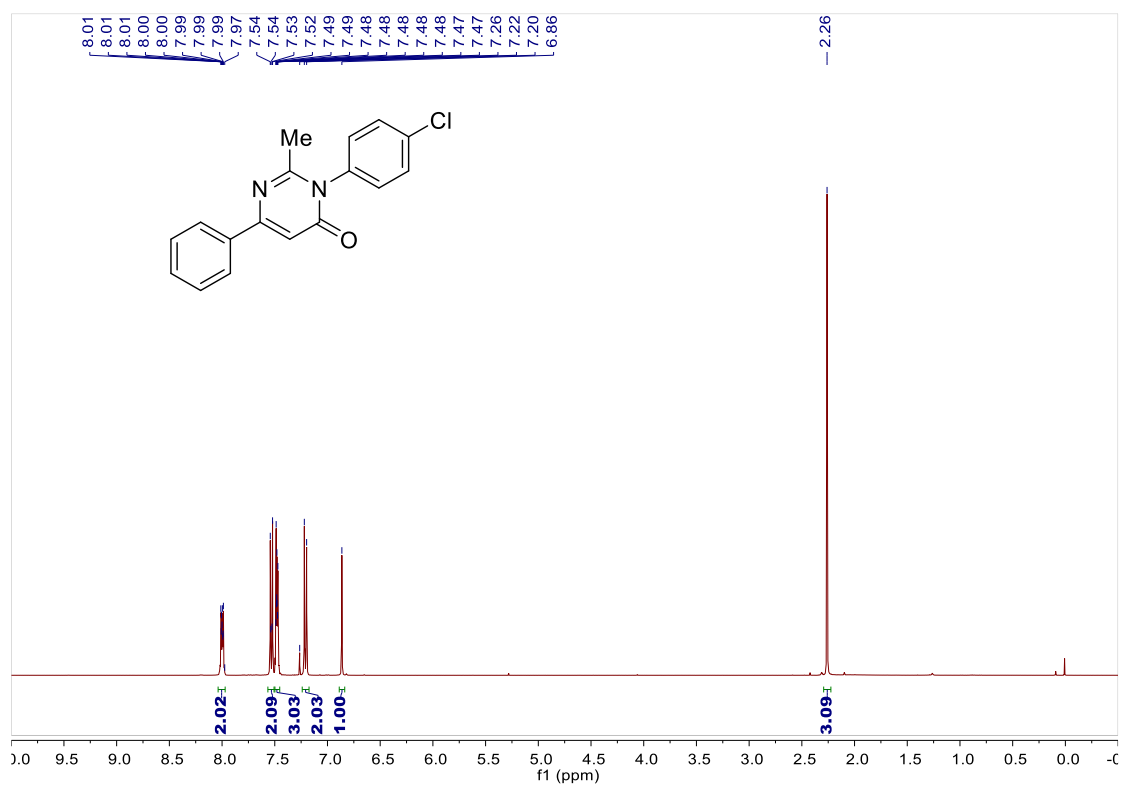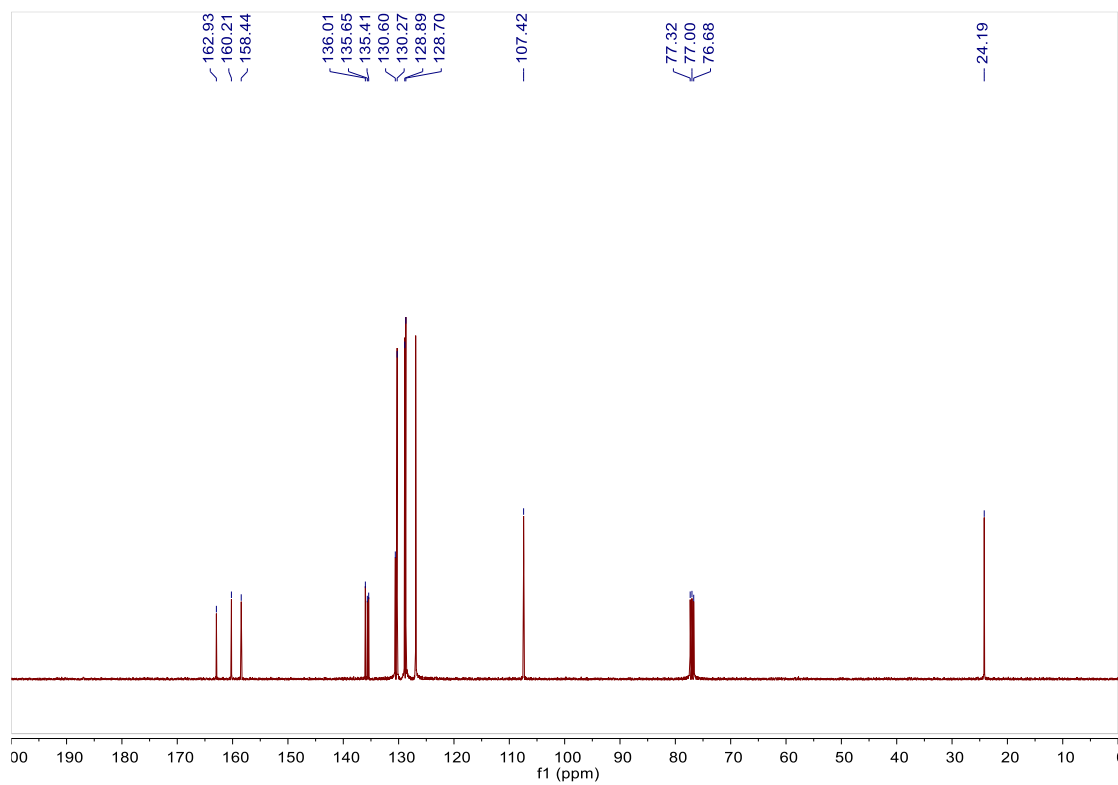

**<sup>1</sup>H and <sup>13</sup>C NMR spectra for product 3ac (CDCl<sub>3</sub>)**

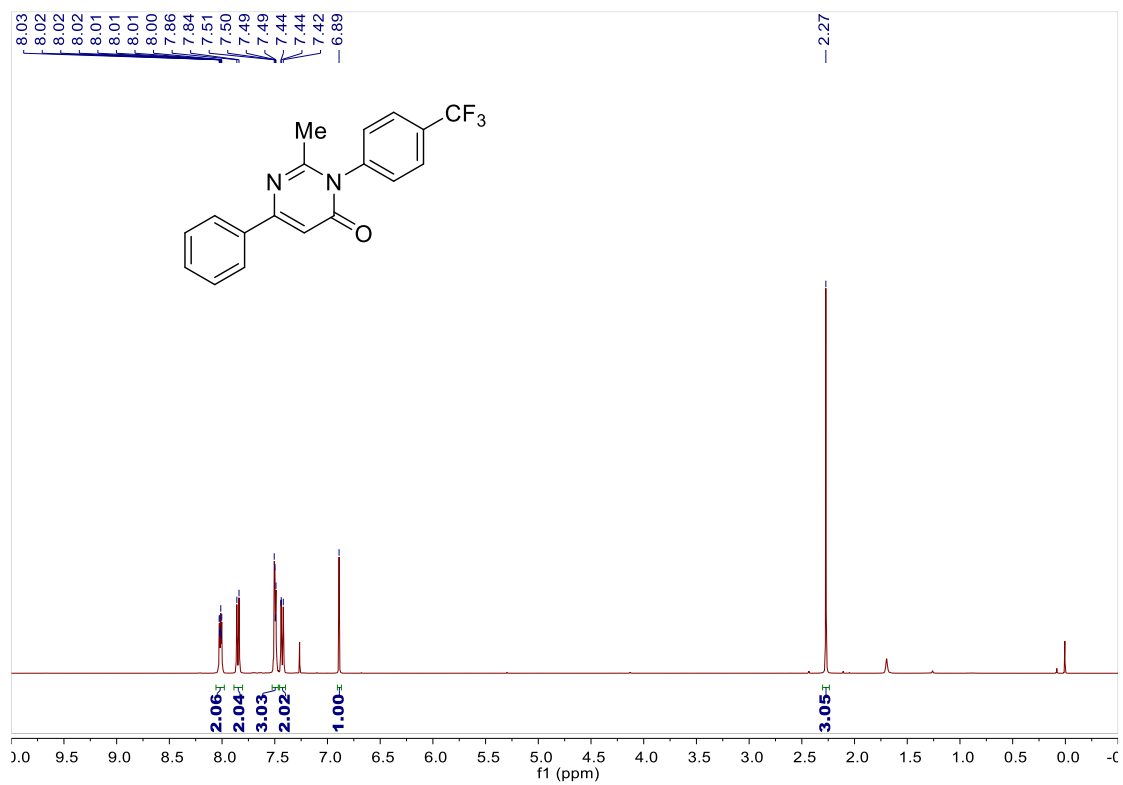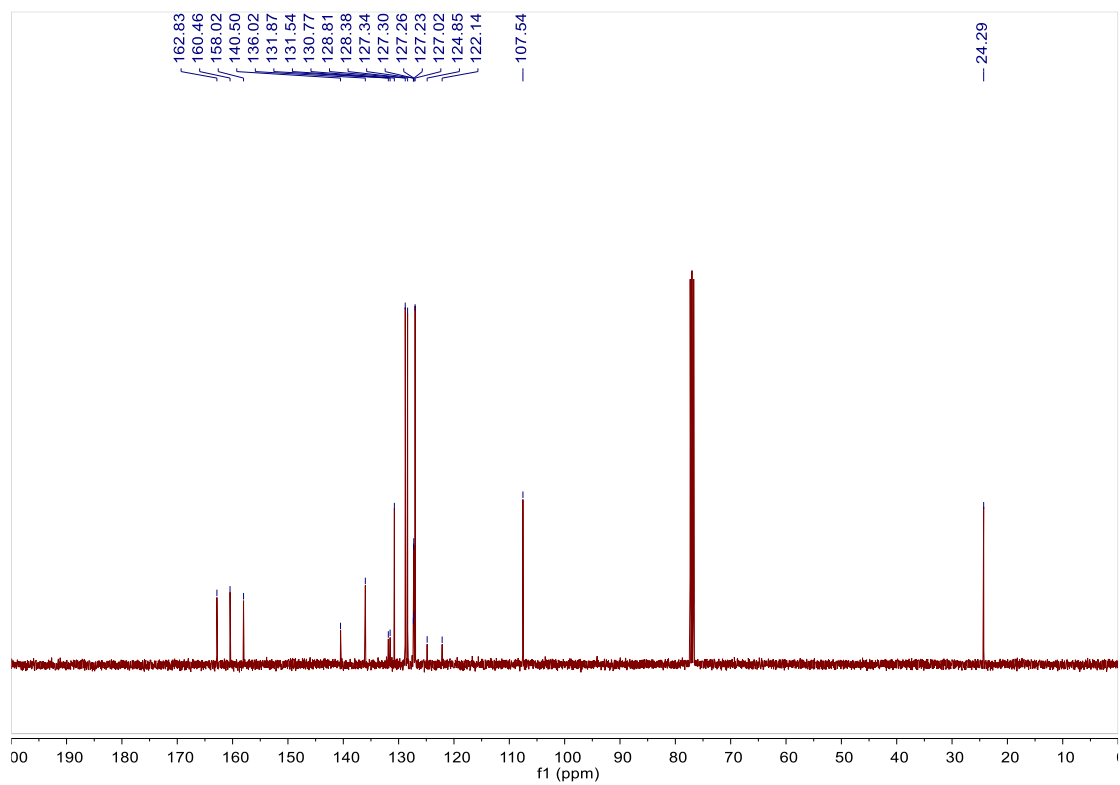

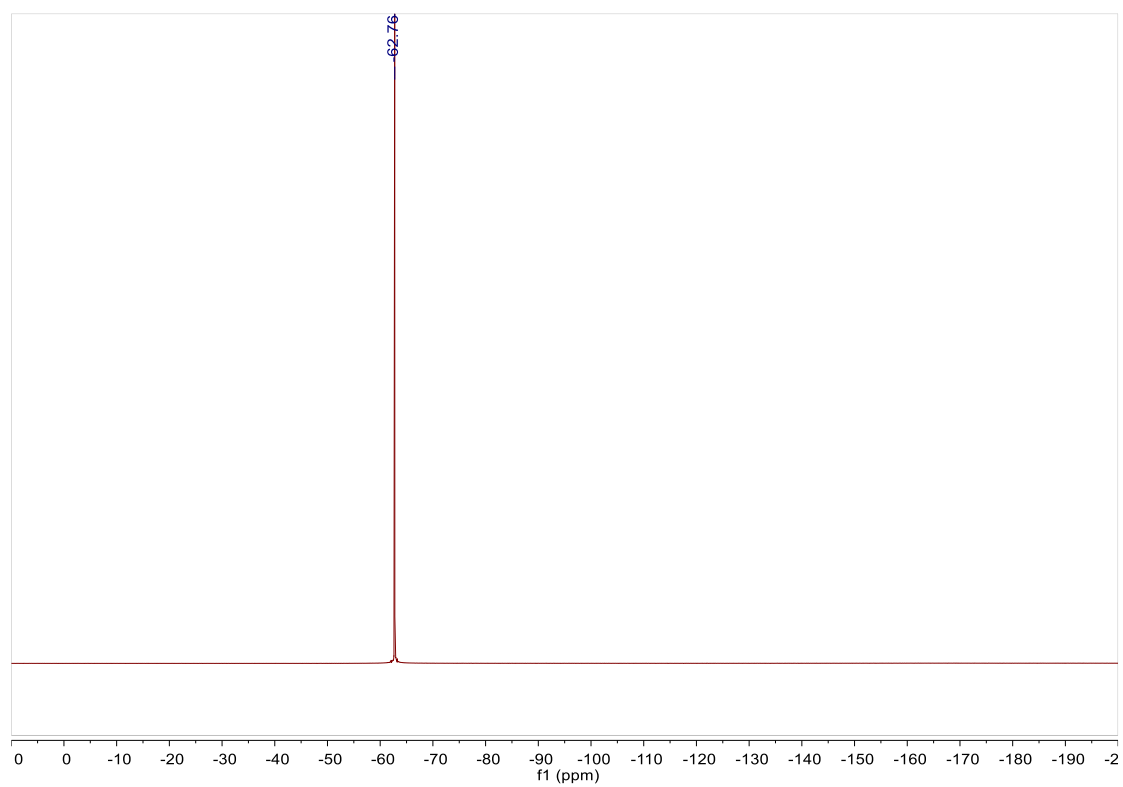

**$^1\text{H}$ ,  $^{13}\text{C}$  and  $^{19}\text{F}$  NMR spectra for product 3ad ( $\text{CDCl}_3$ )**

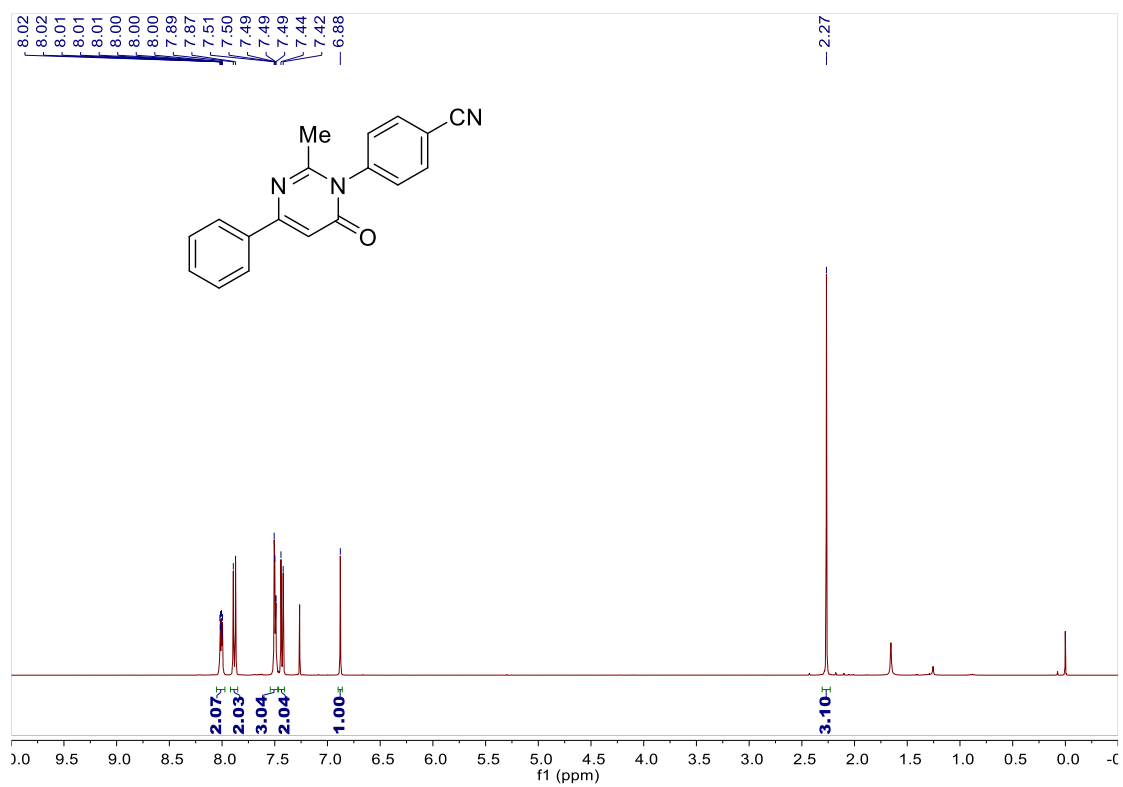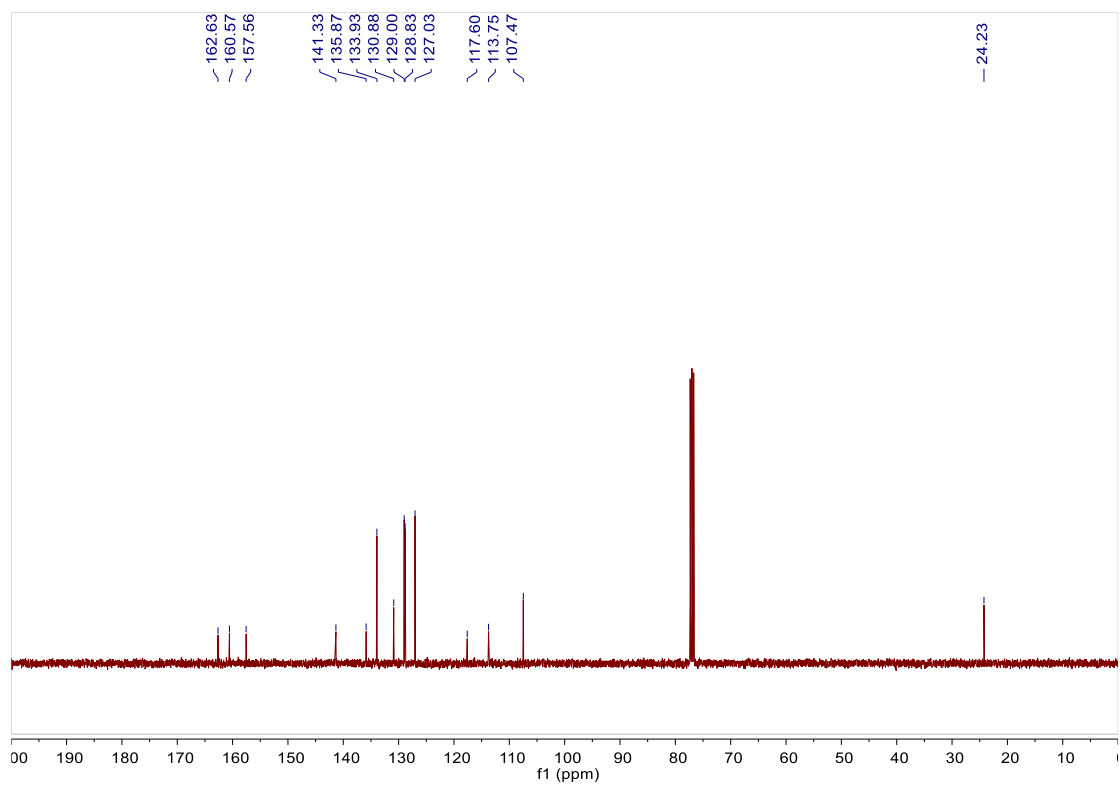

**<sup>1</sup>H and <sup>13</sup>C NMR spectra for product 3ae (CDCl<sub>3</sub>)**

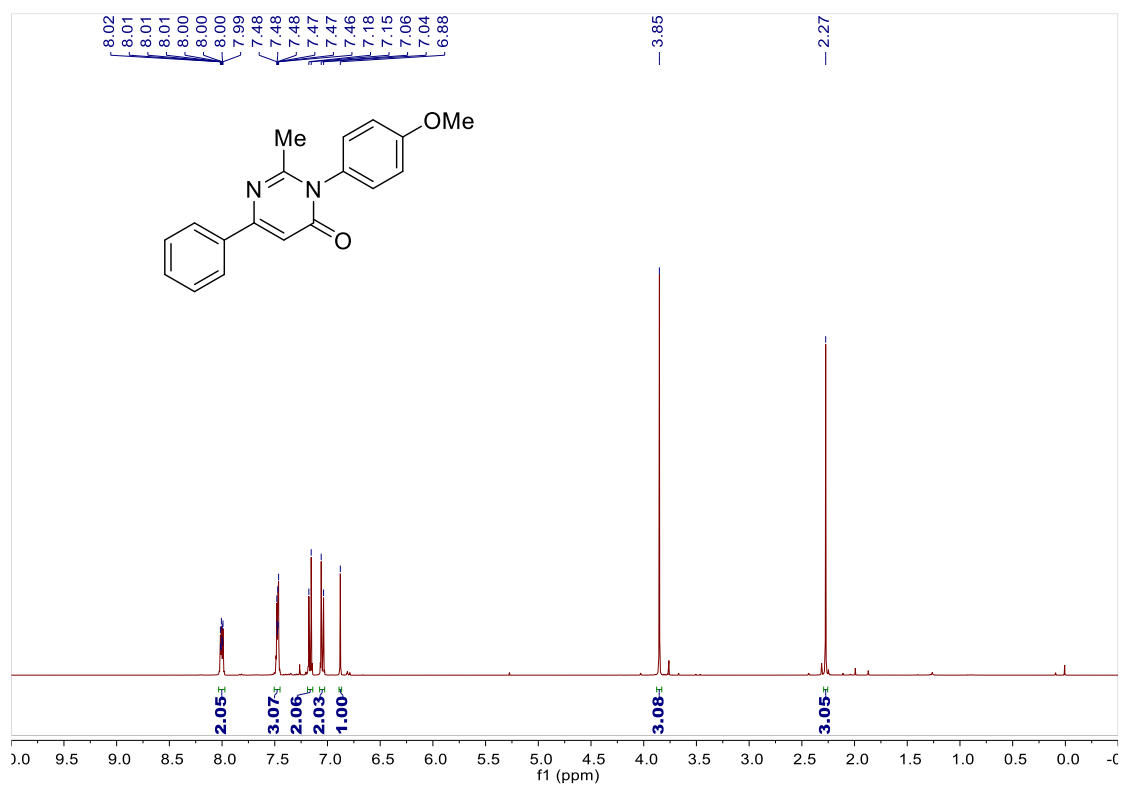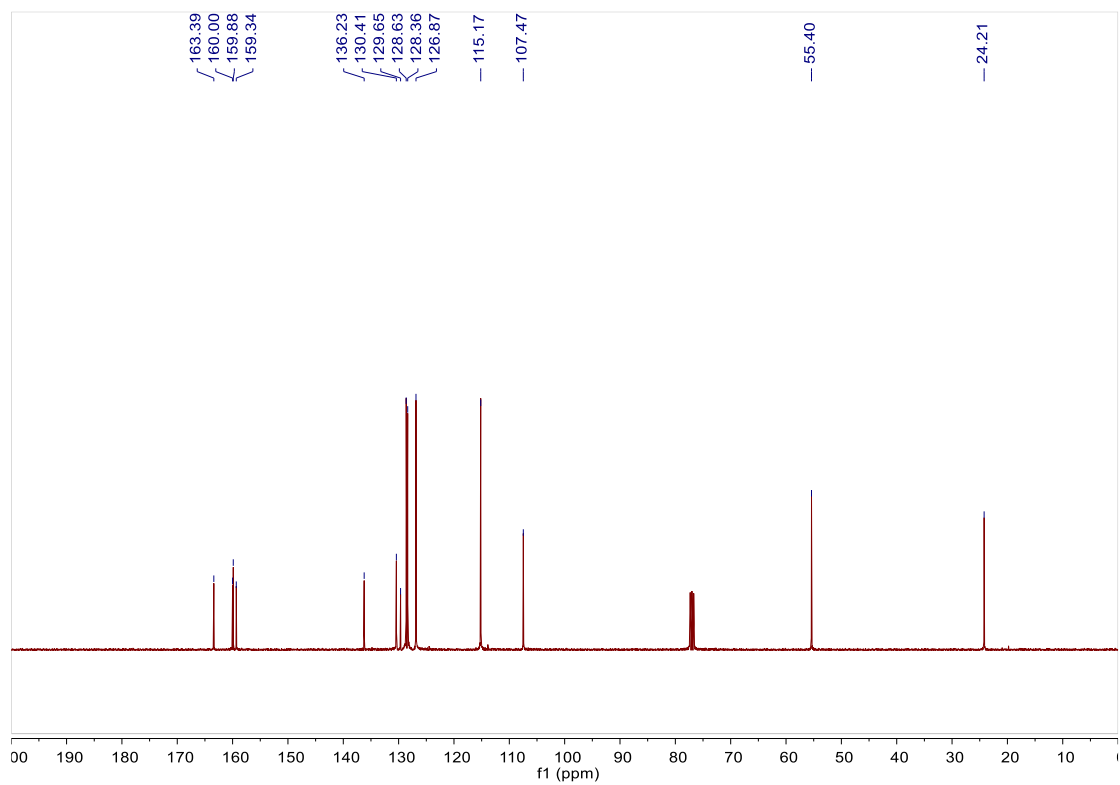

**<sup>1</sup>H and <sup>13</sup>C NMR spectra for product 3af (CDCl<sub>3</sub>)**

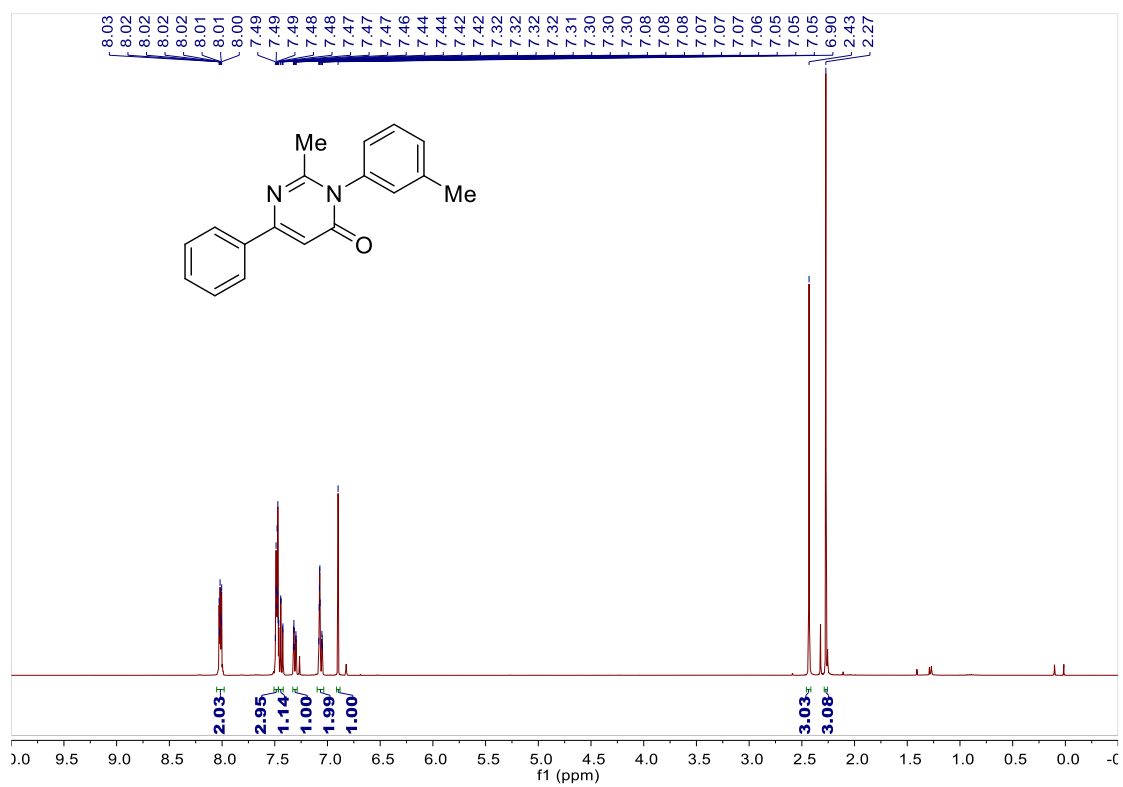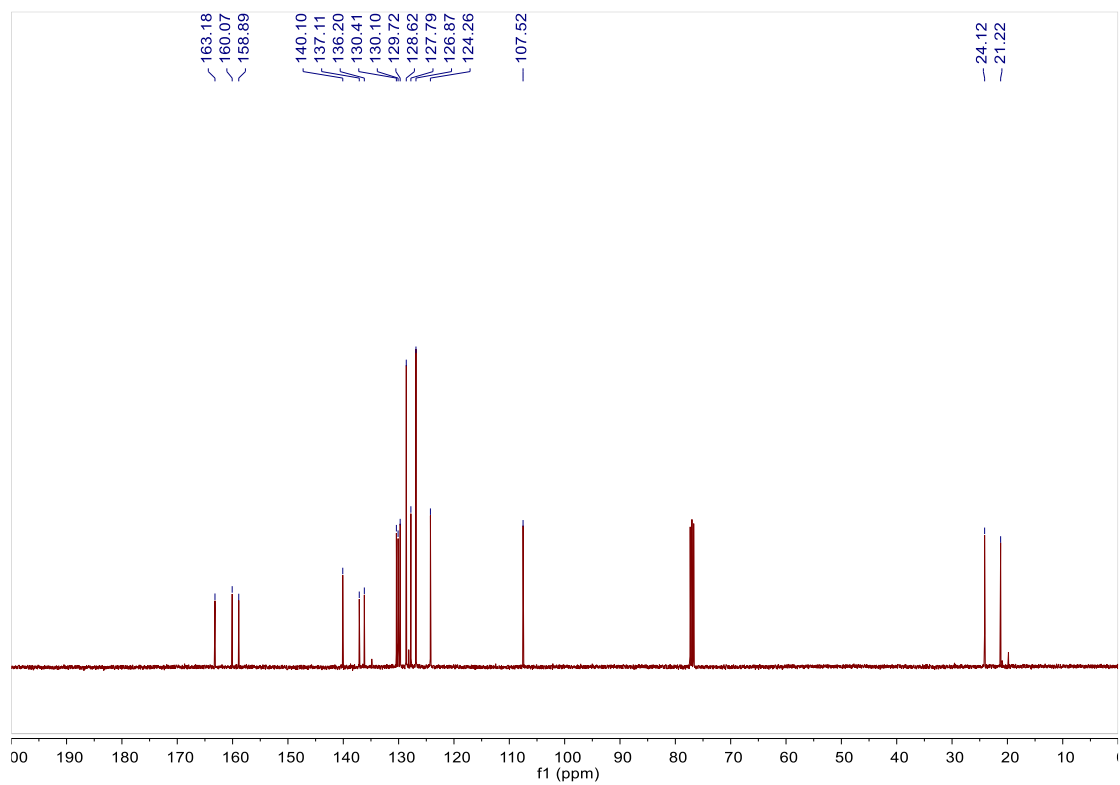

**<sup>1</sup>H and <sup>13</sup>C NMR spectra for product 3ag (CDCl<sub>3</sub>)**



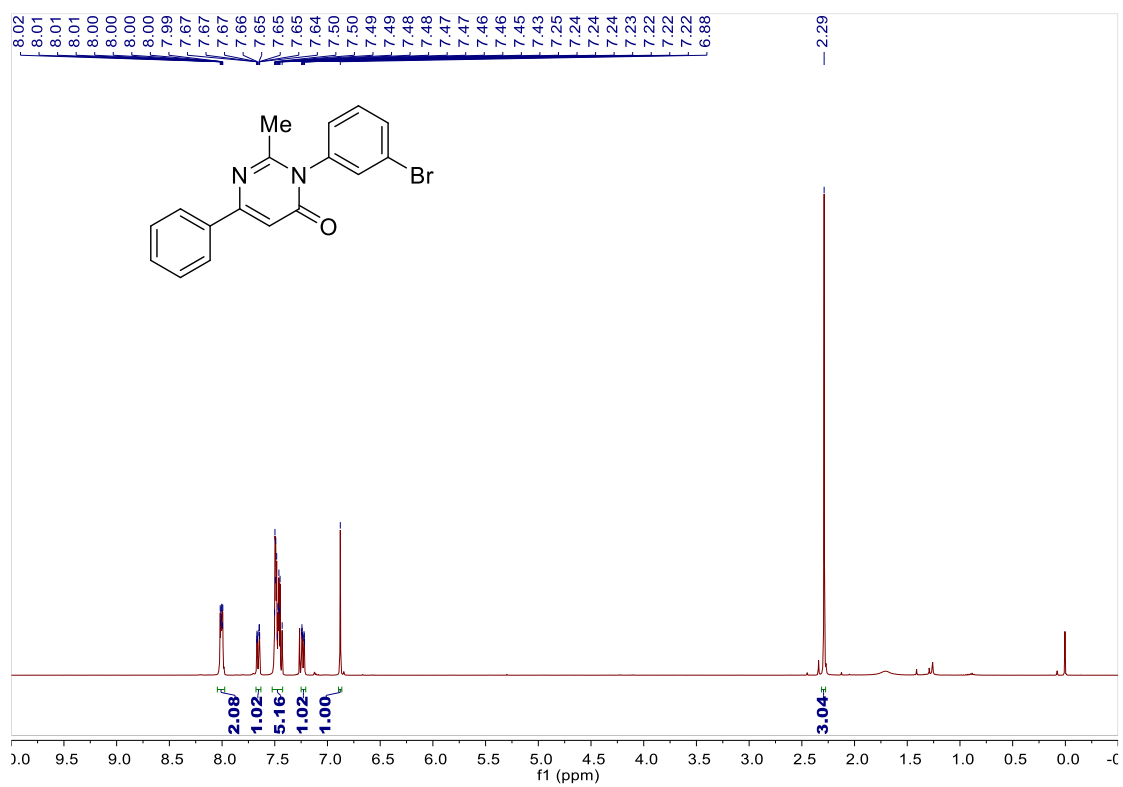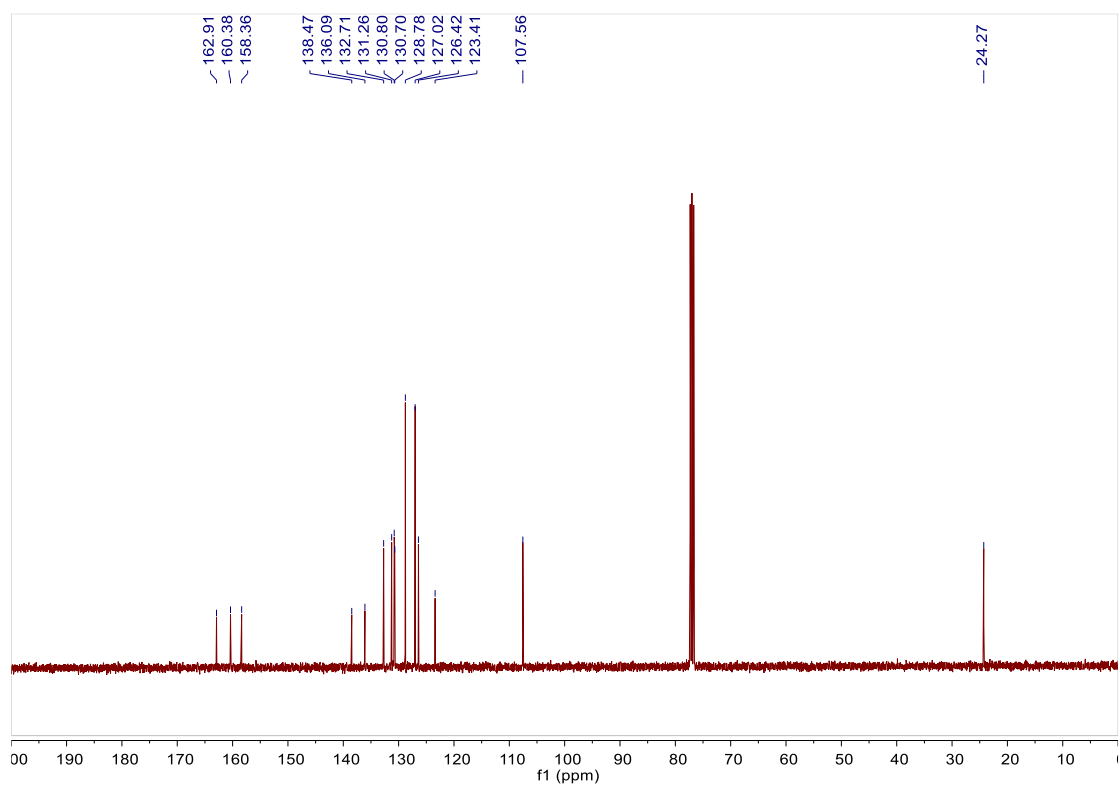

**<sup>1</sup>H and <sup>13</sup>C NMR spectra for product 3ah (CDCl<sub>3</sub>)**

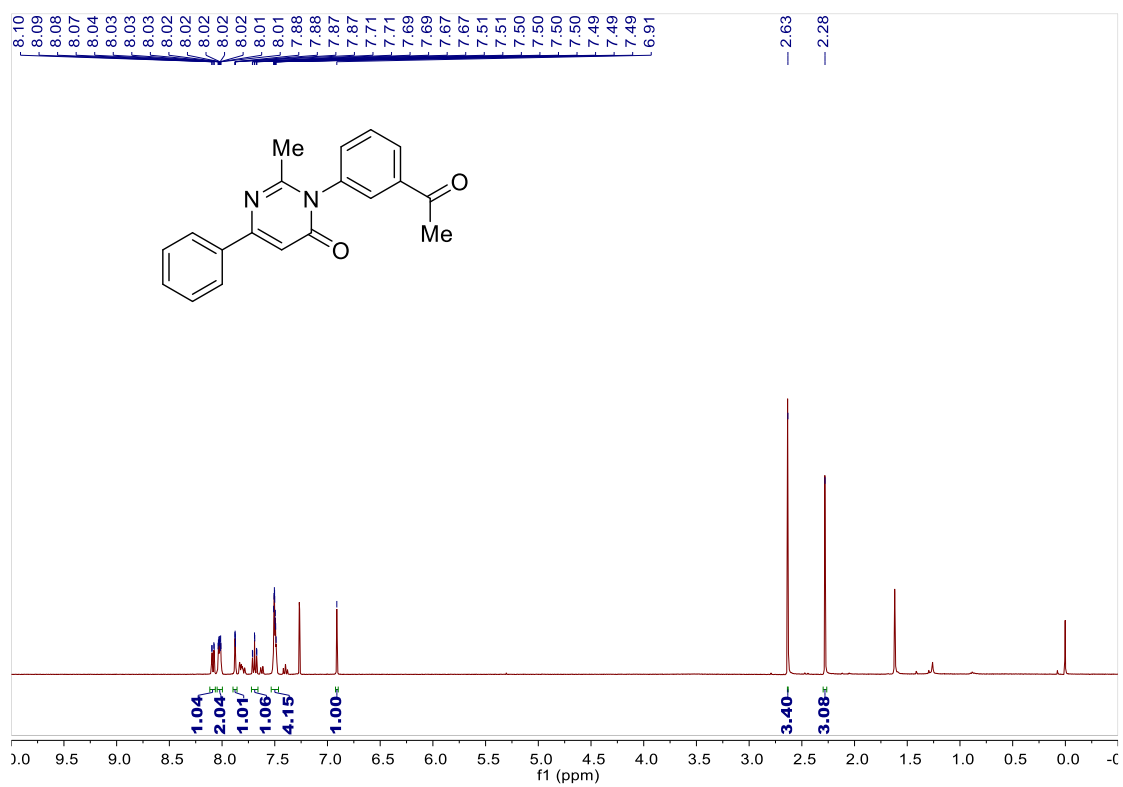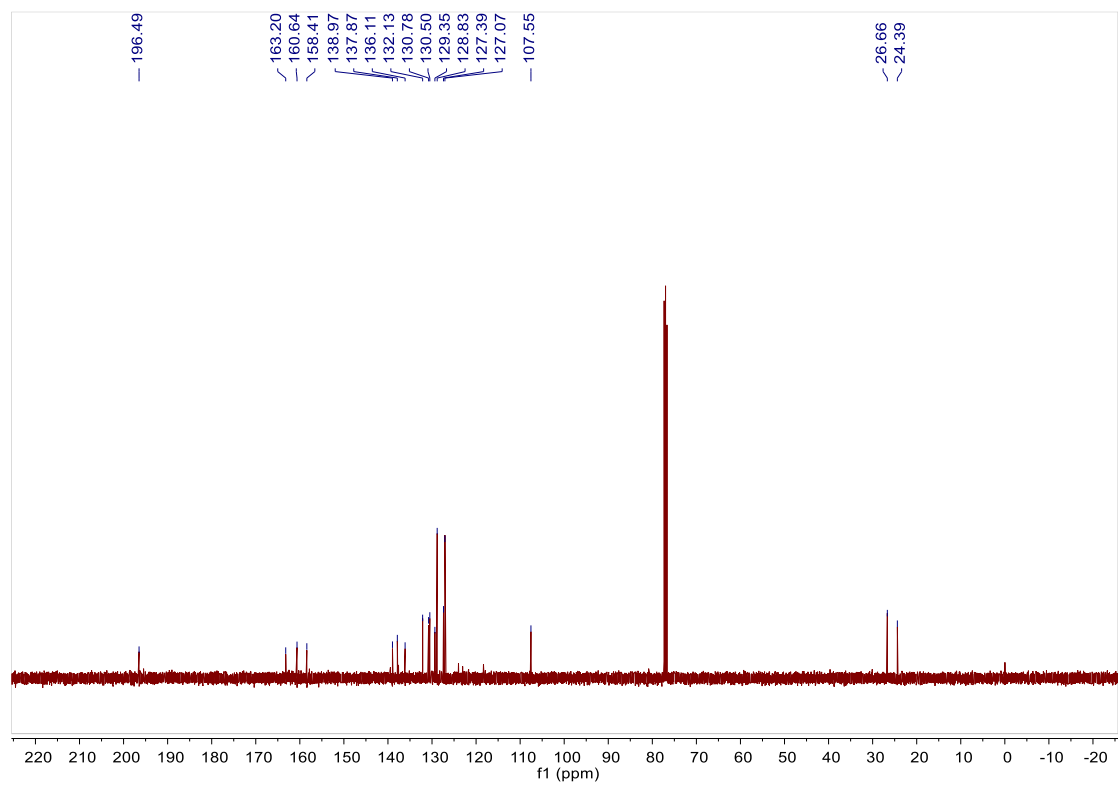

**<sup>1</sup>H and <sup>13</sup>C NMR spectra for product 3ai (CDCl<sub>3</sub>)**

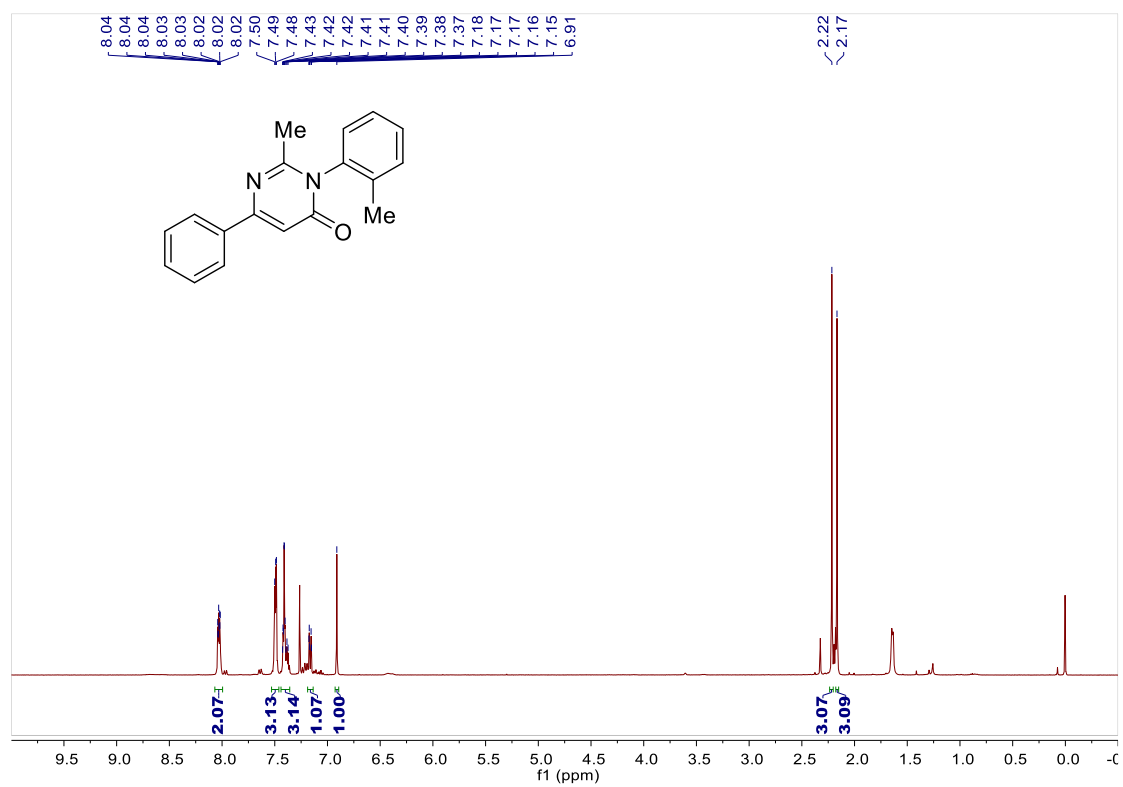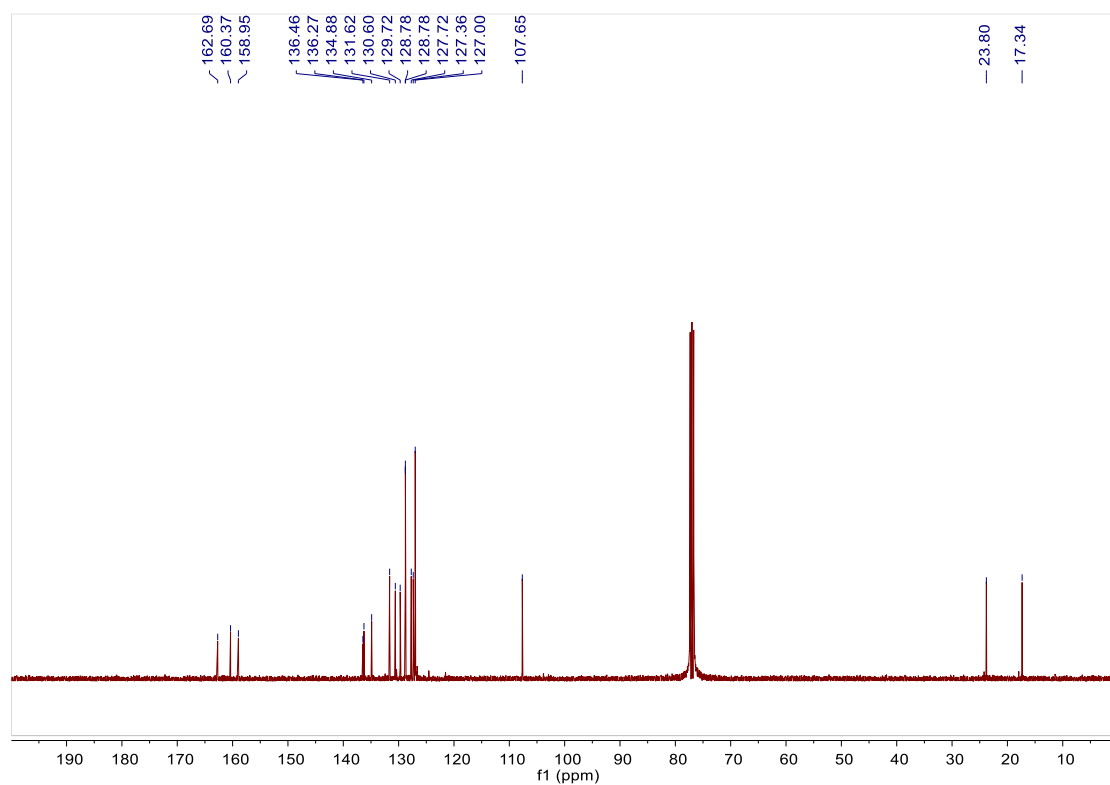

**<sup>1</sup>H and <sup>13</sup>C NMR spectra for product 3aj (CDCl<sub>3</sub>)**

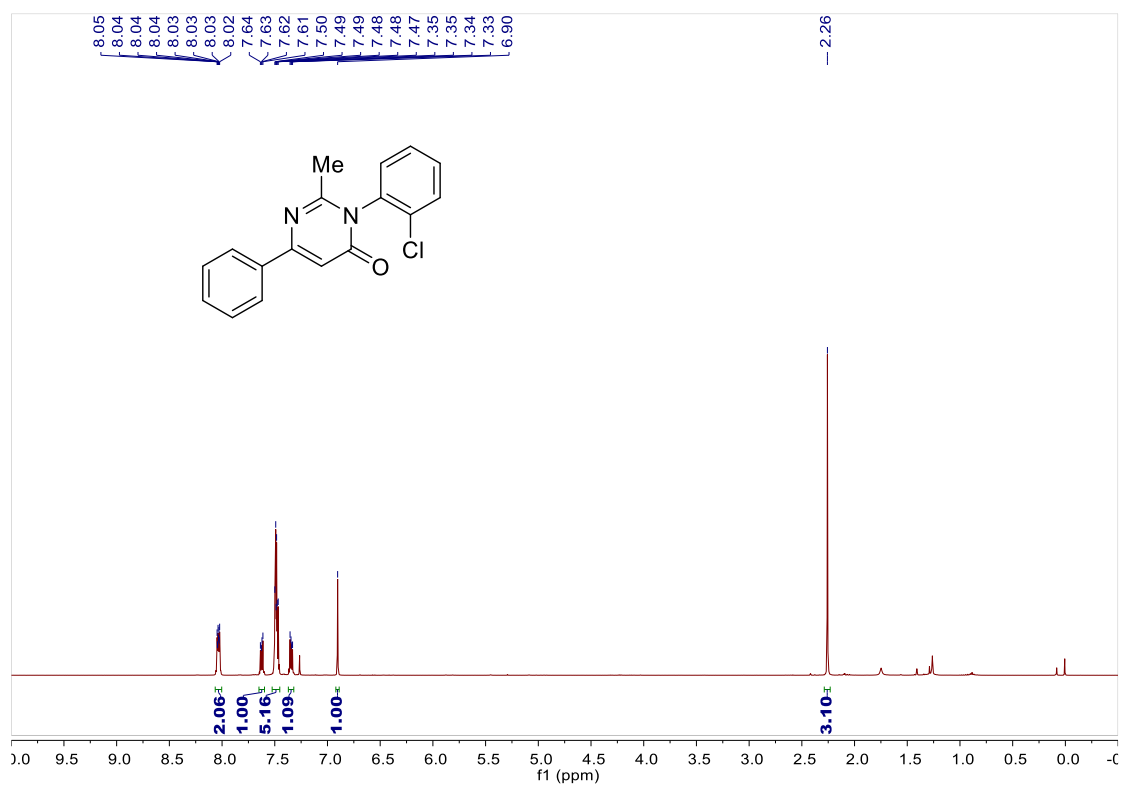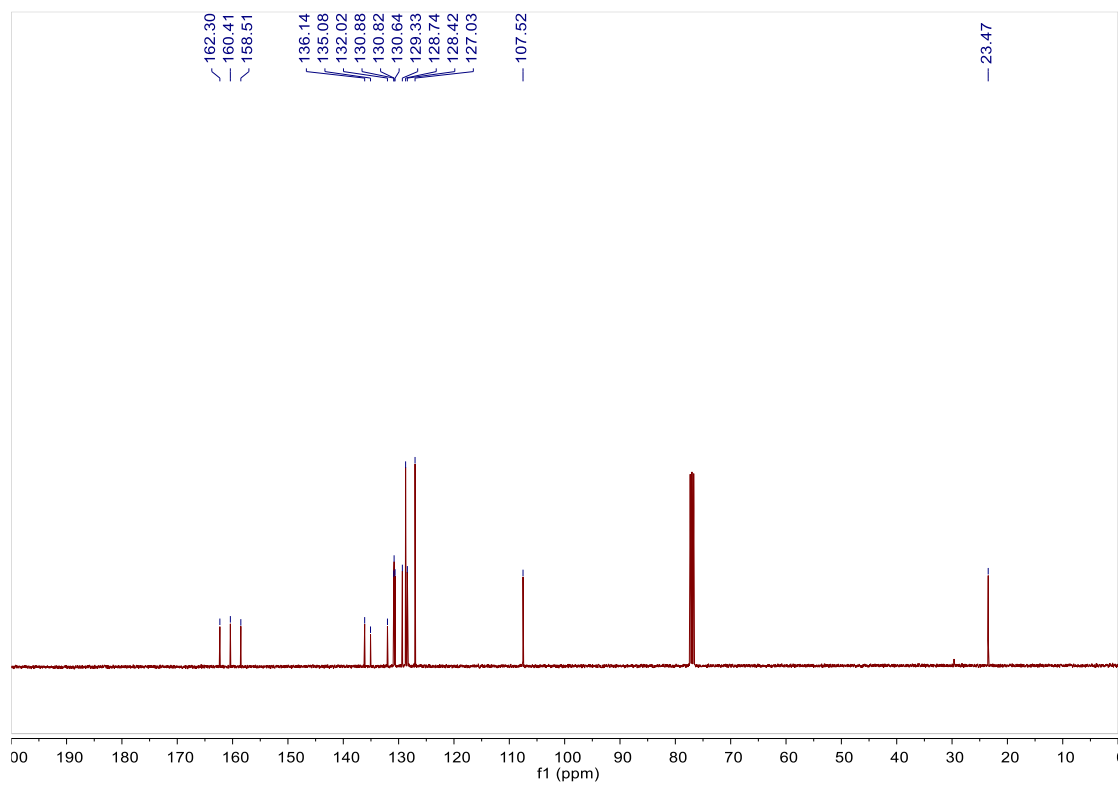

**<sup>1</sup>H and <sup>13</sup>C NMR spectra for product 3ak (CDCl<sub>3</sub>)**

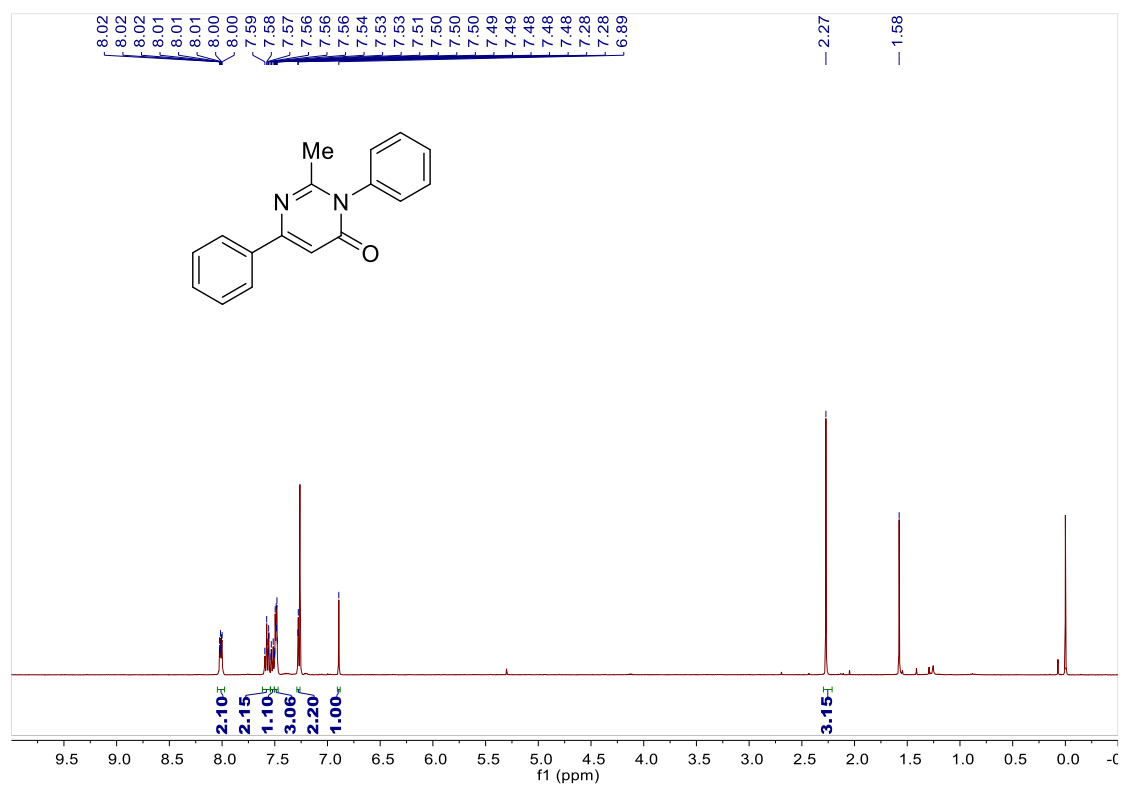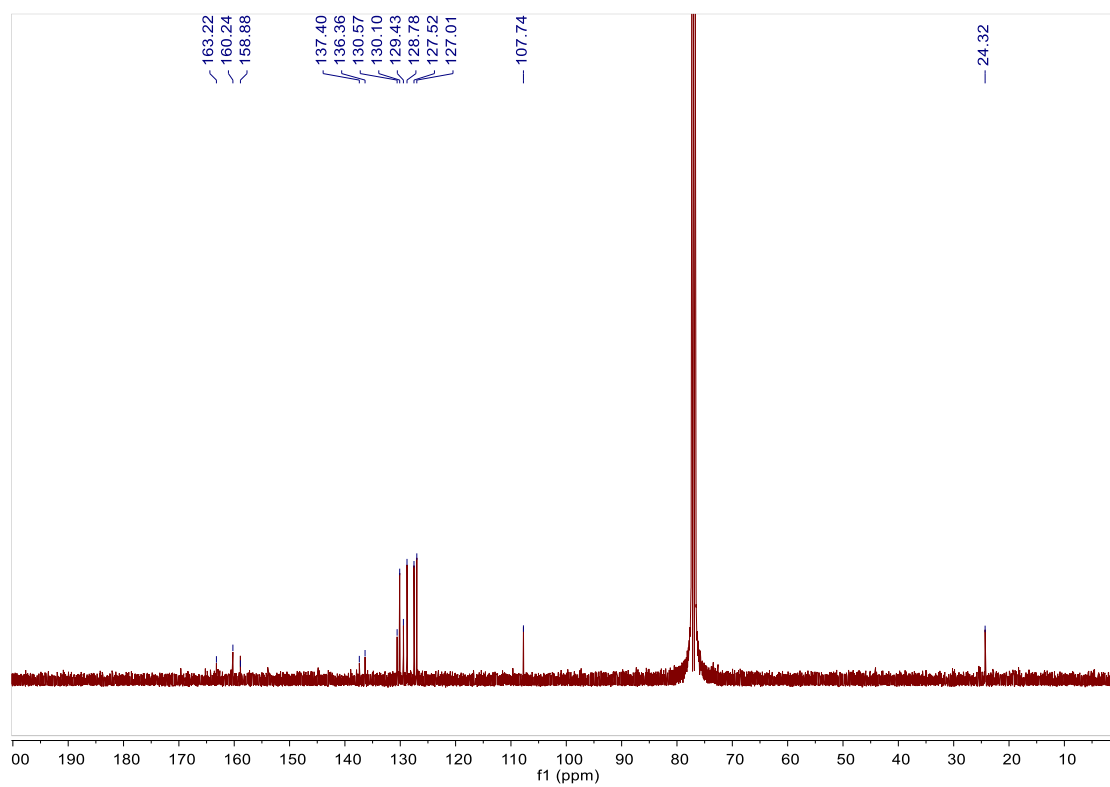

**<sup>1</sup>H and <sup>13</sup>C NMR spectra for product 3al (CDCl<sub>3</sub>)**

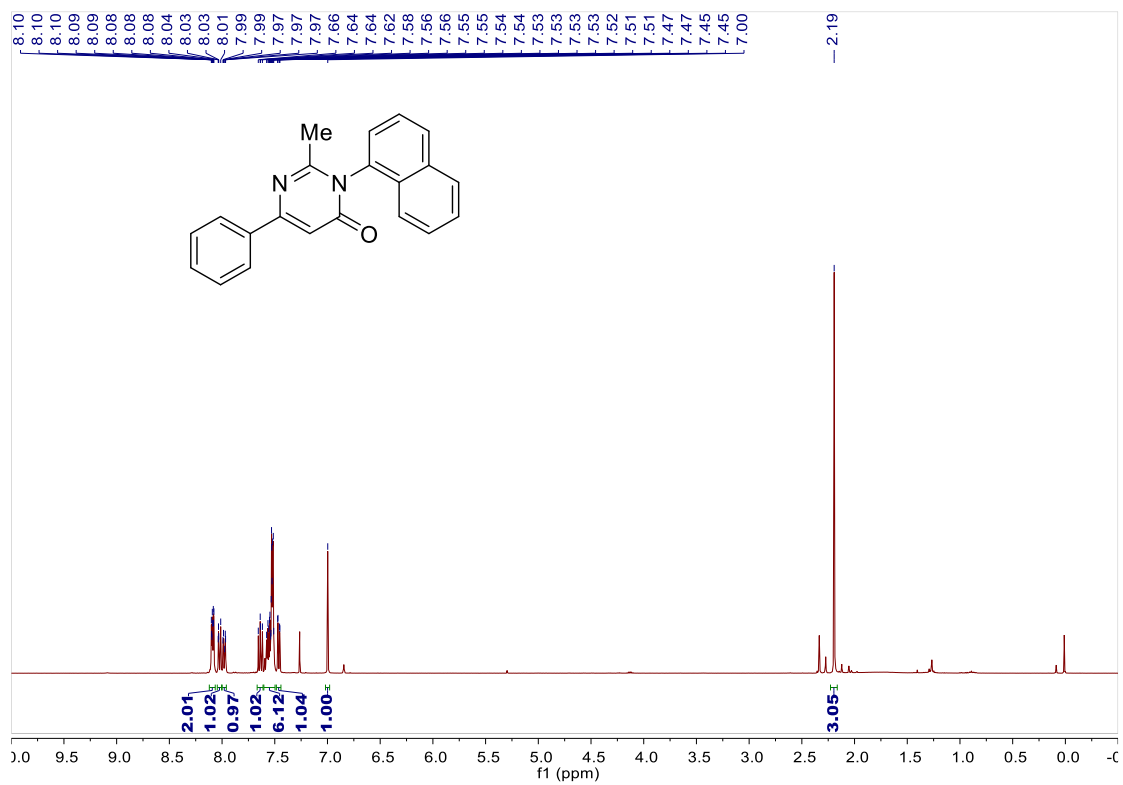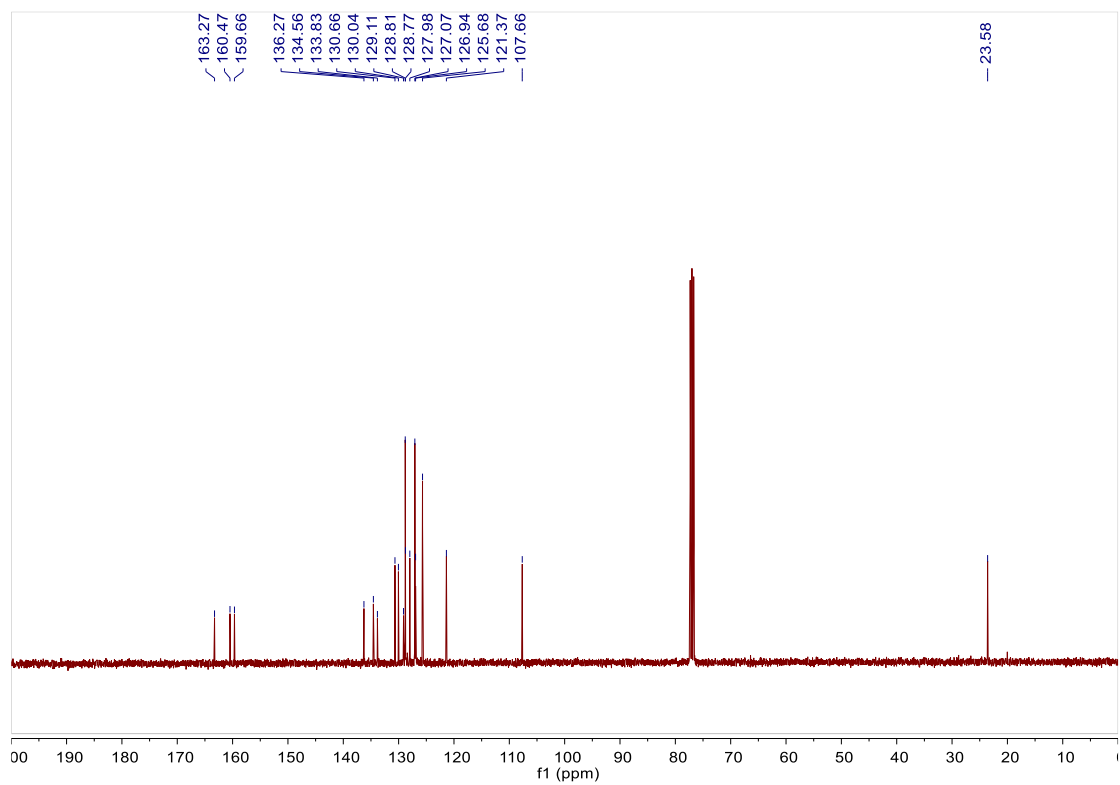

**<sup>1</sup>H and <sup>13</sup>C NMR spectra for product 3am (CDCl<sub>3</sub>)**

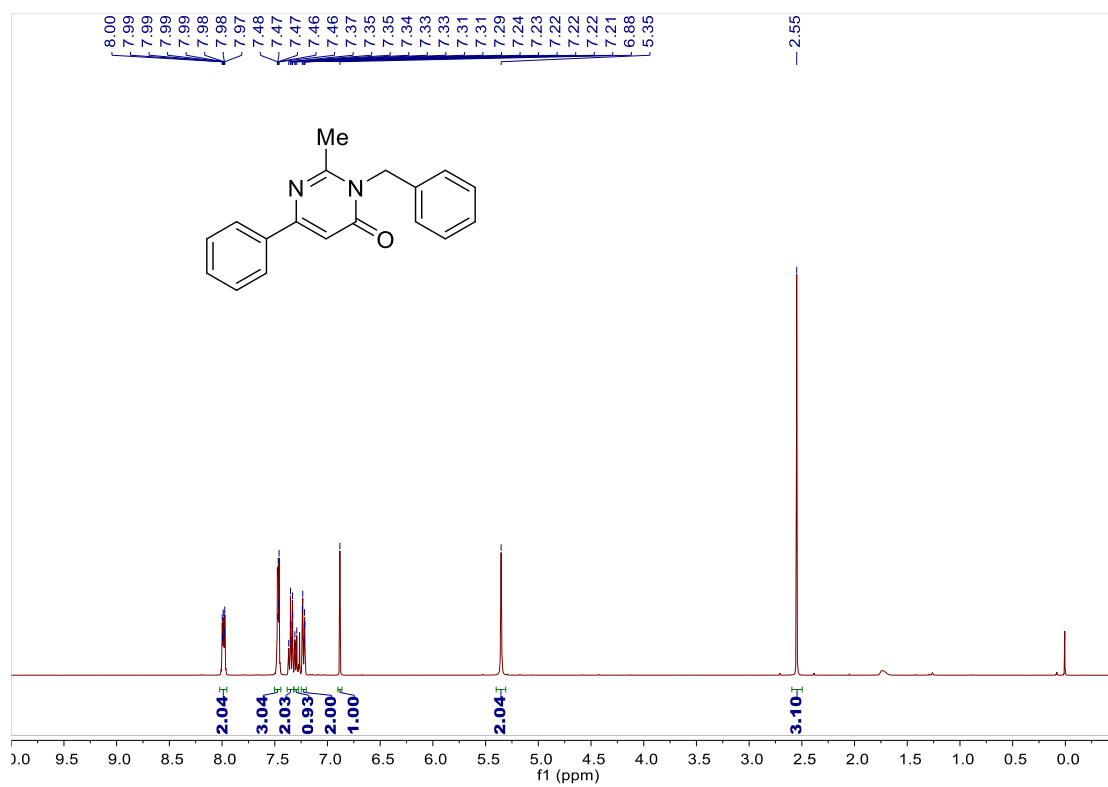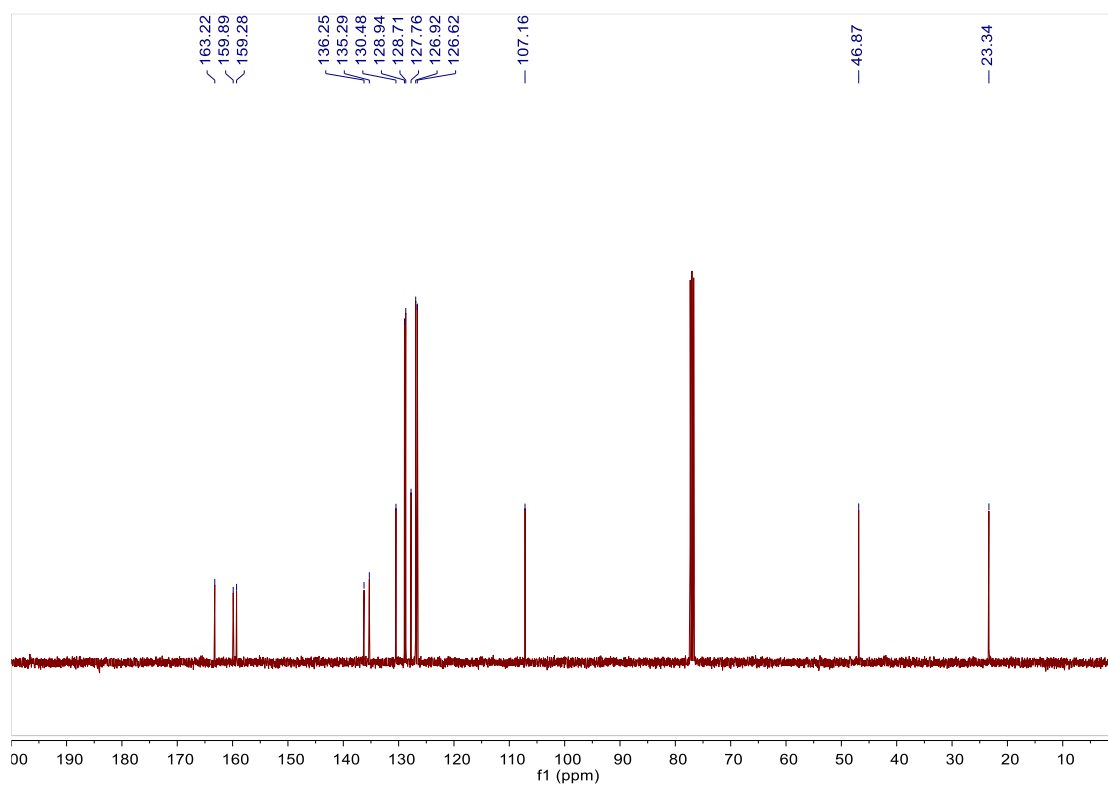

<sup>1</sup>H and <sup>13</sup>C NMR spectra for product 3an (CDCl<sub>3</sub>)

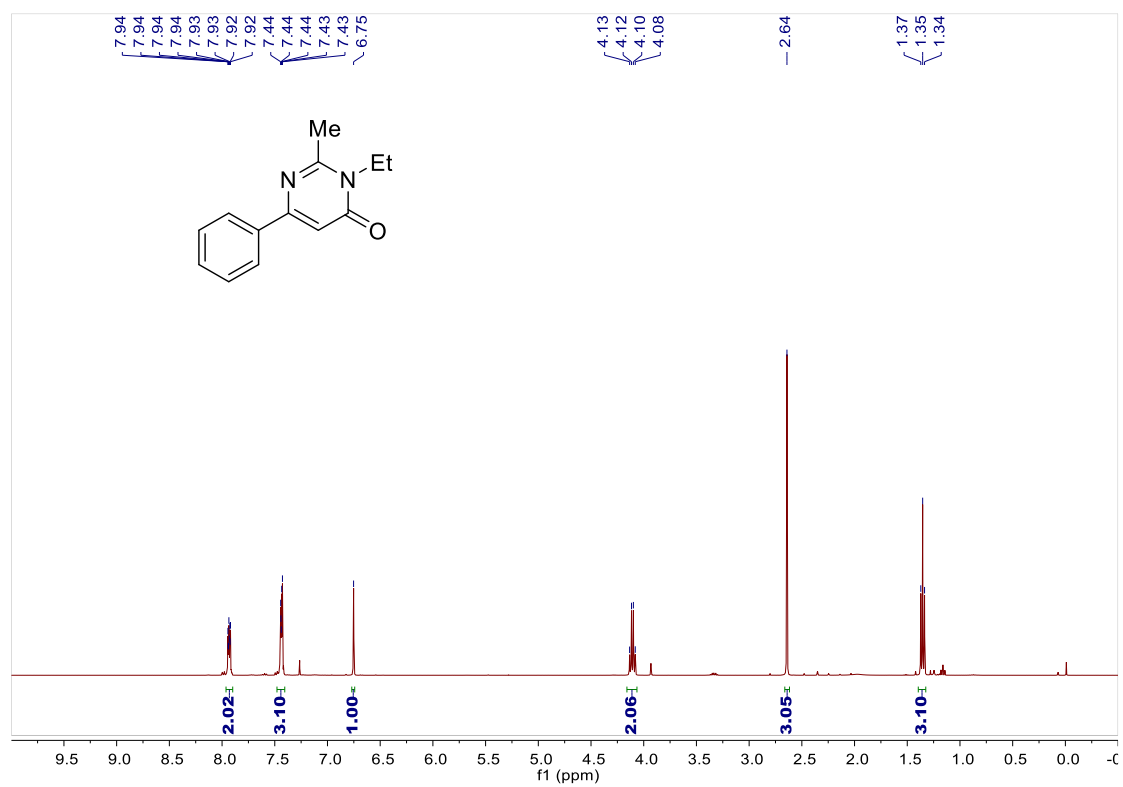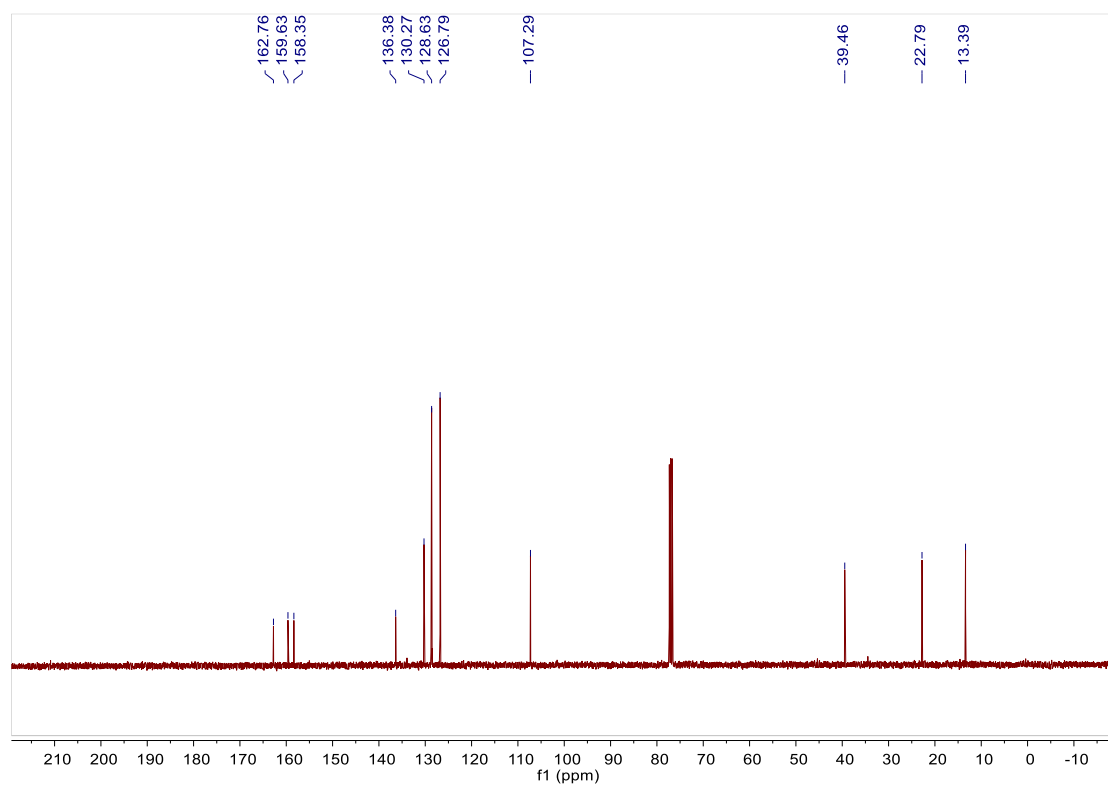

<sup>1</sup>H and <sup>13</sup>C NMR spectra for product 3ao (CDCl<sub>3</sub>)



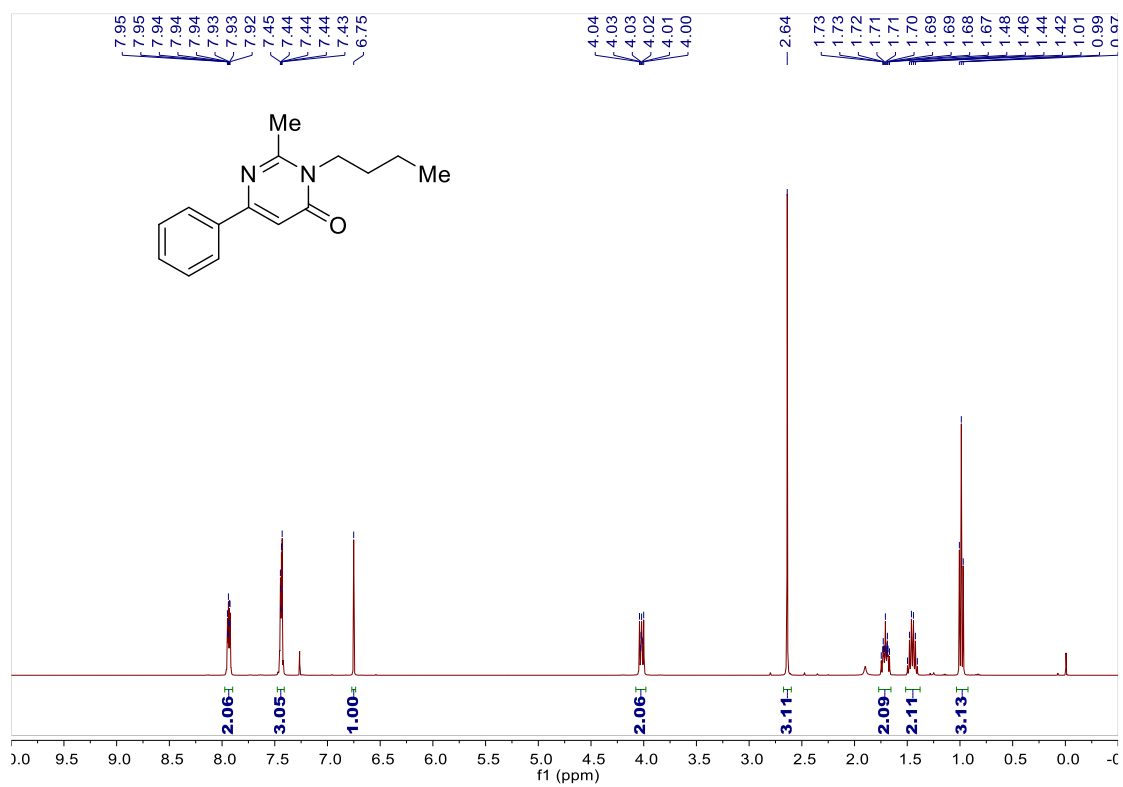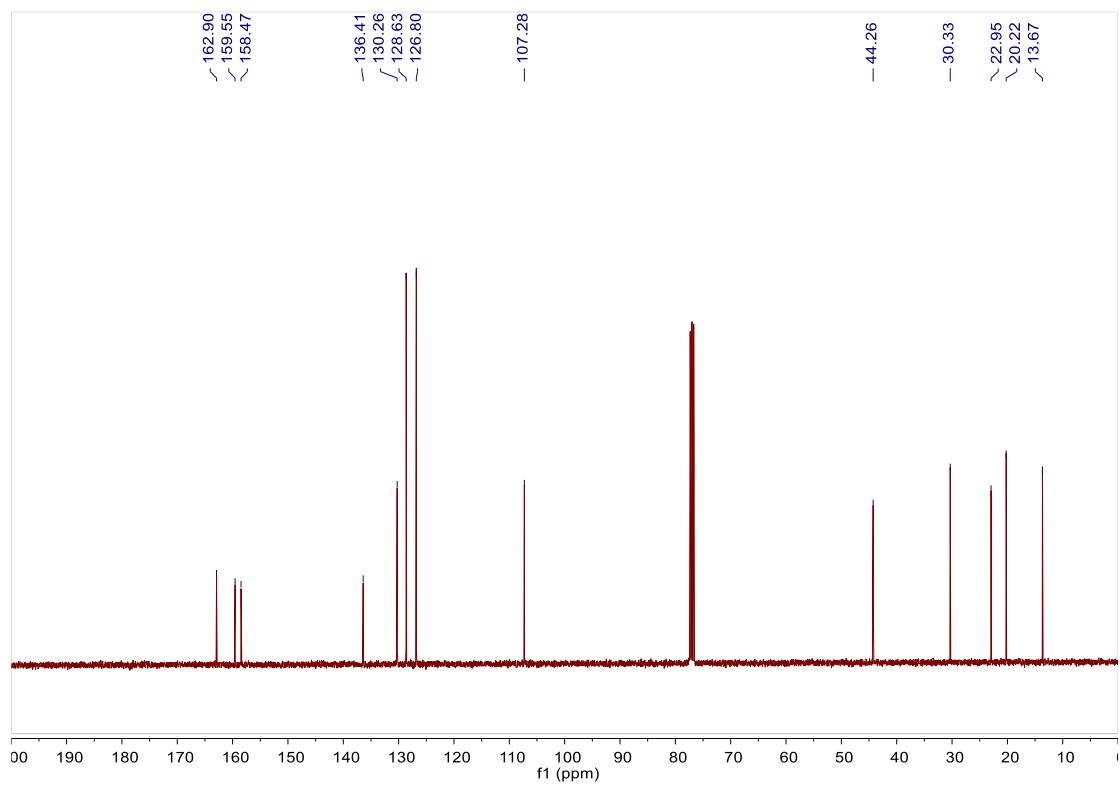

**<sup>1</sup>H and <sup>13</sup>C NMR spectra for product 3ap (CDCl<sub>3</sub>)**

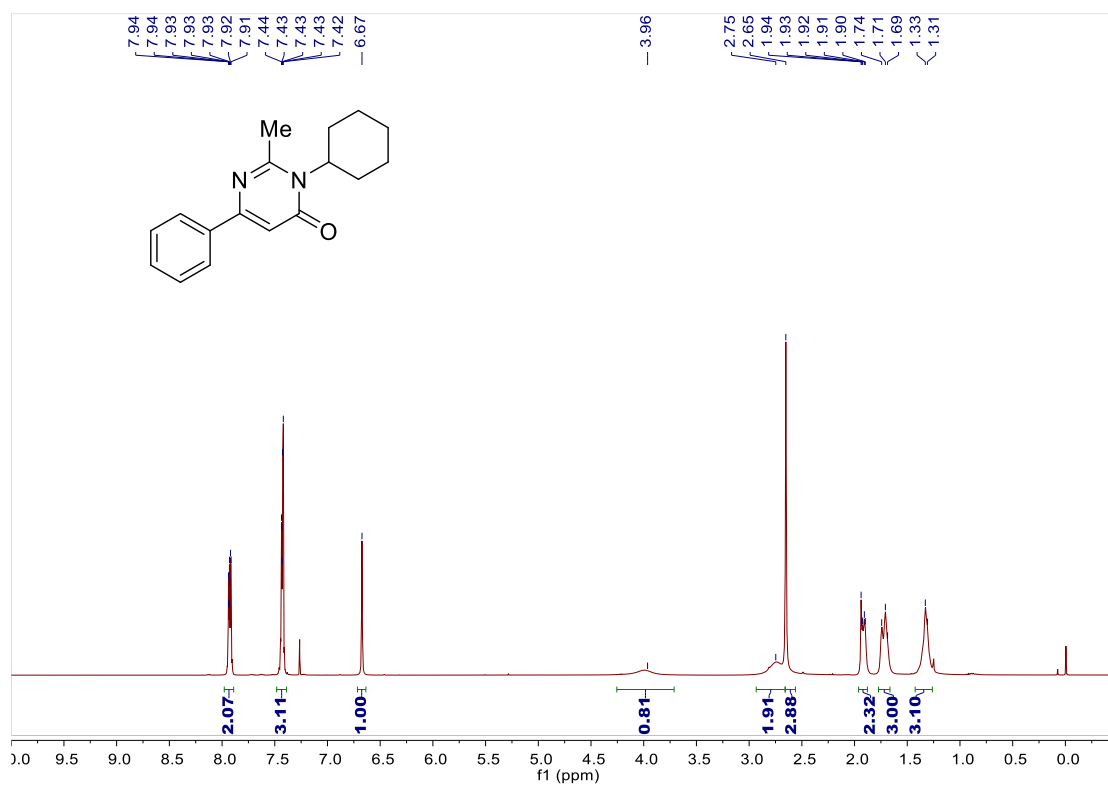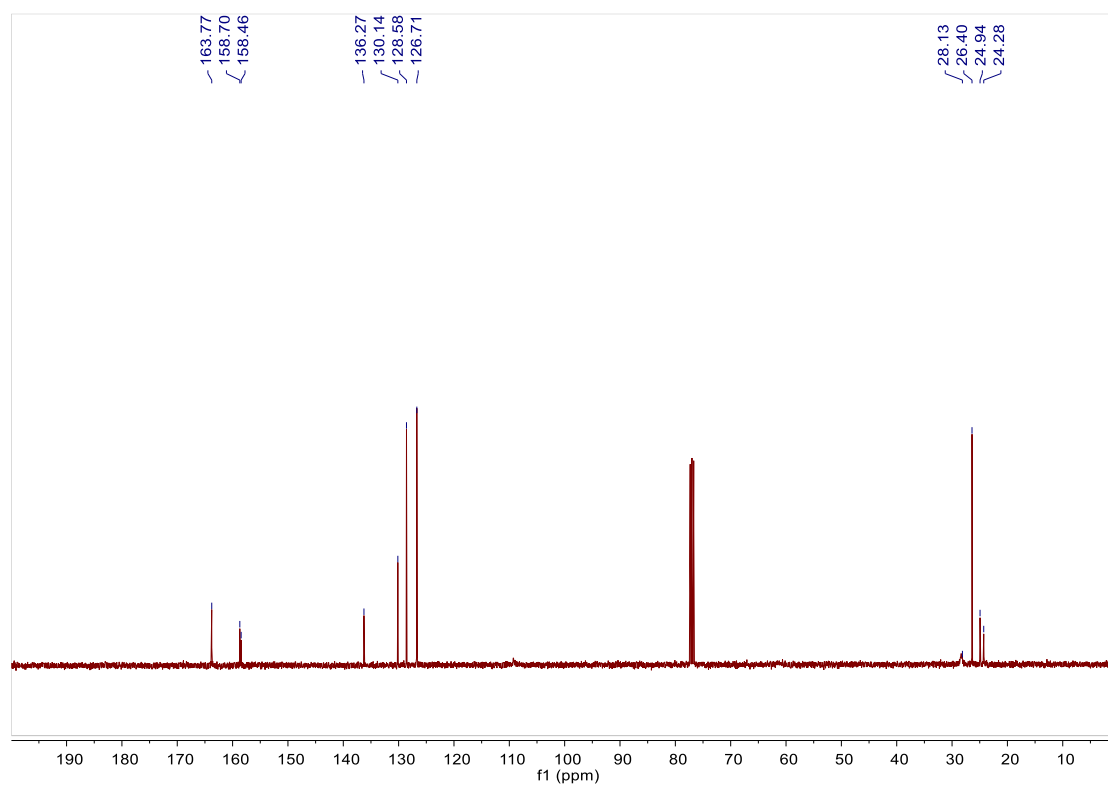

**<sup>1</sup>H and <sup>13</sup>C NMR spectra for product 3aq (CDCl<sub>3</sub>)**

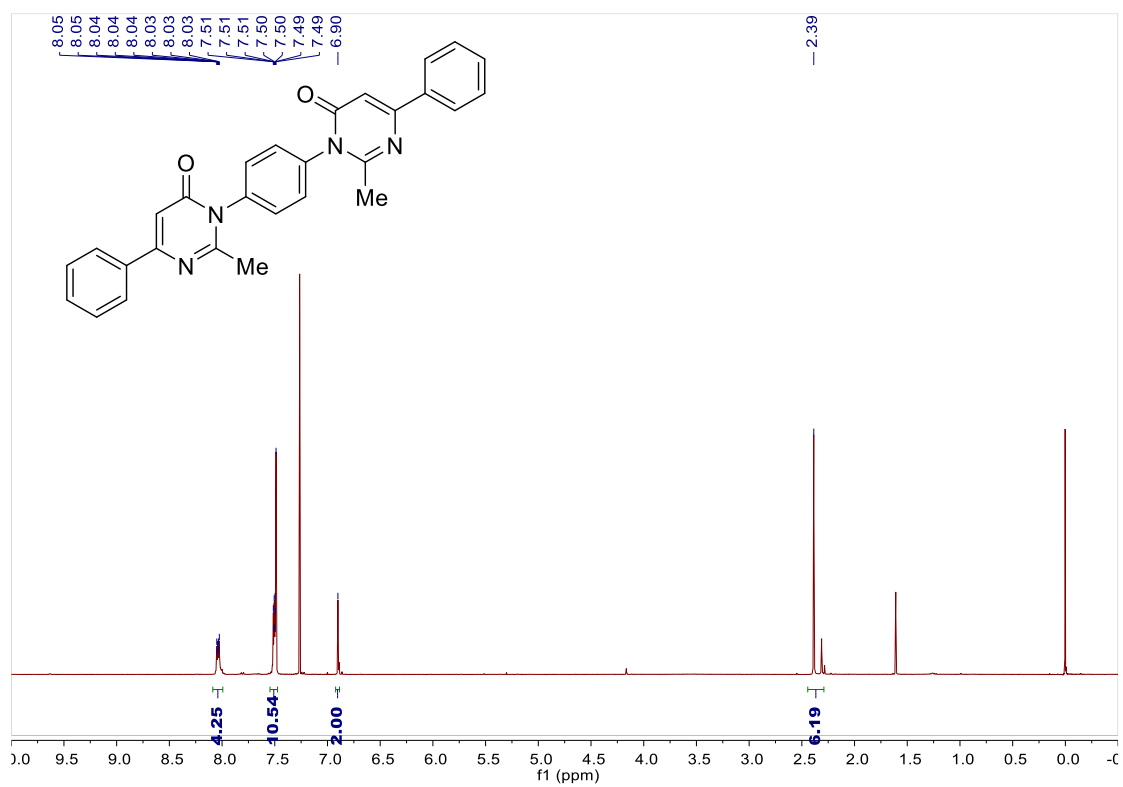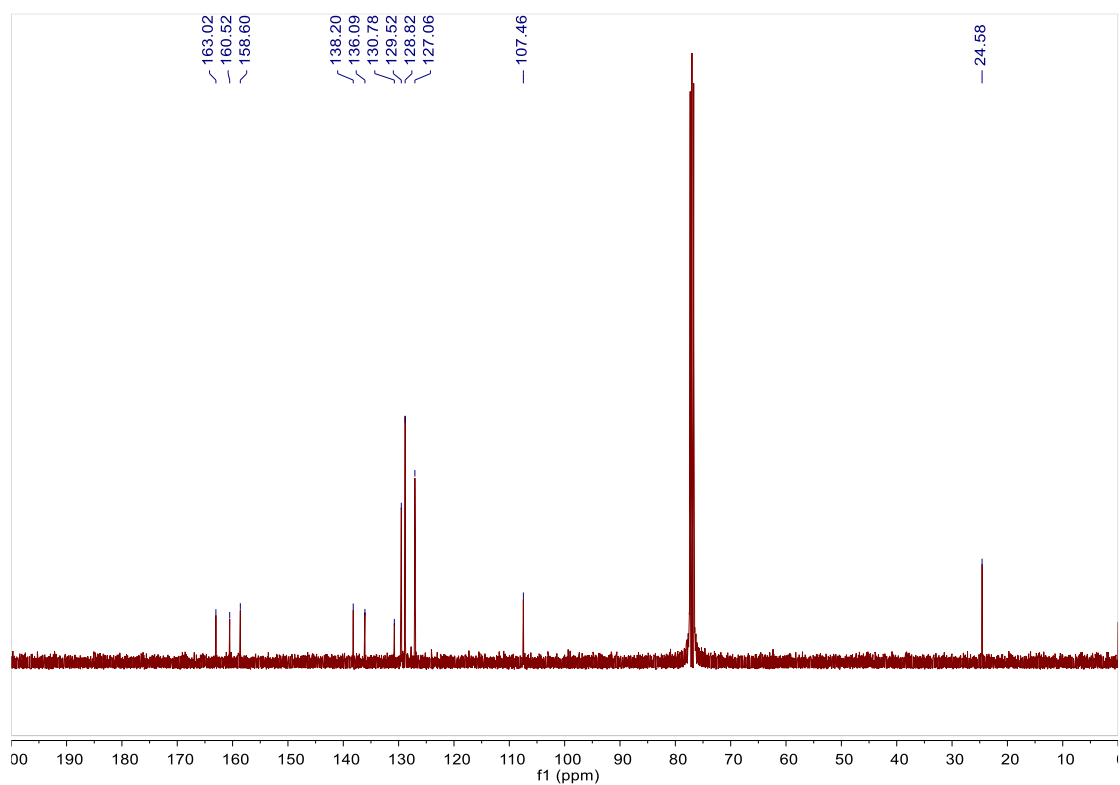

**<sup>1</sup>H and <sup>13</sup>C NMR spectra for product 3ar (CDCl<sub>3</sub>)**

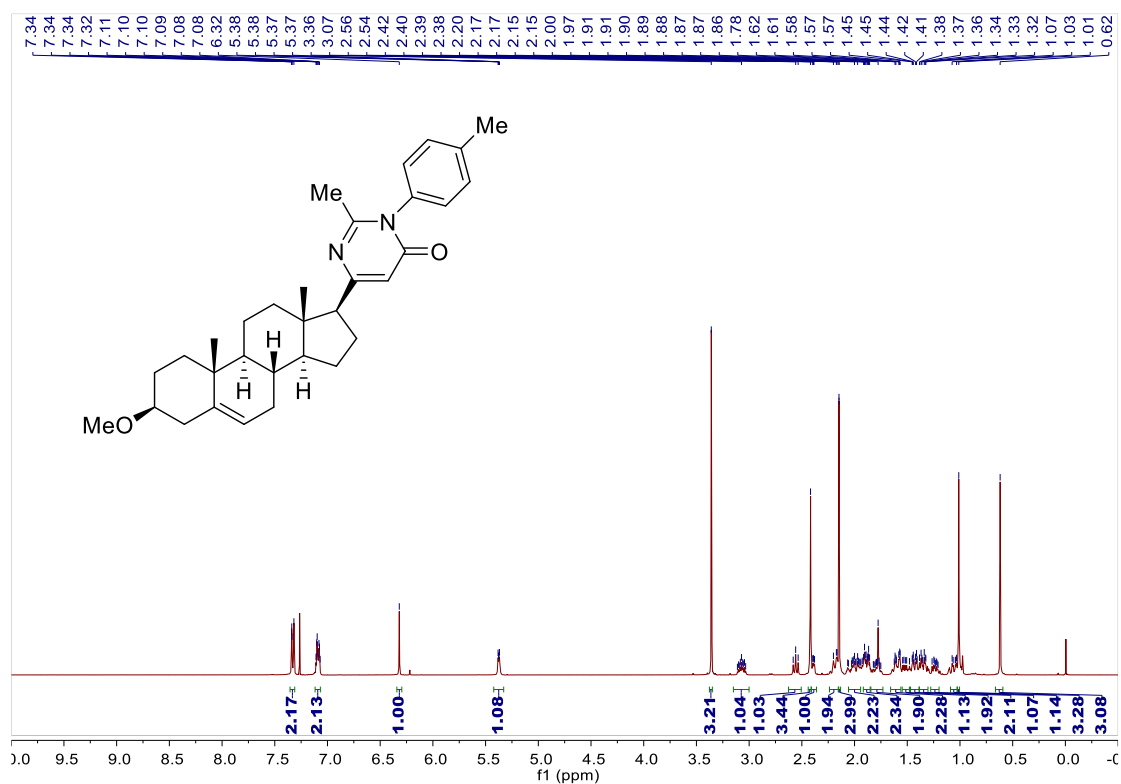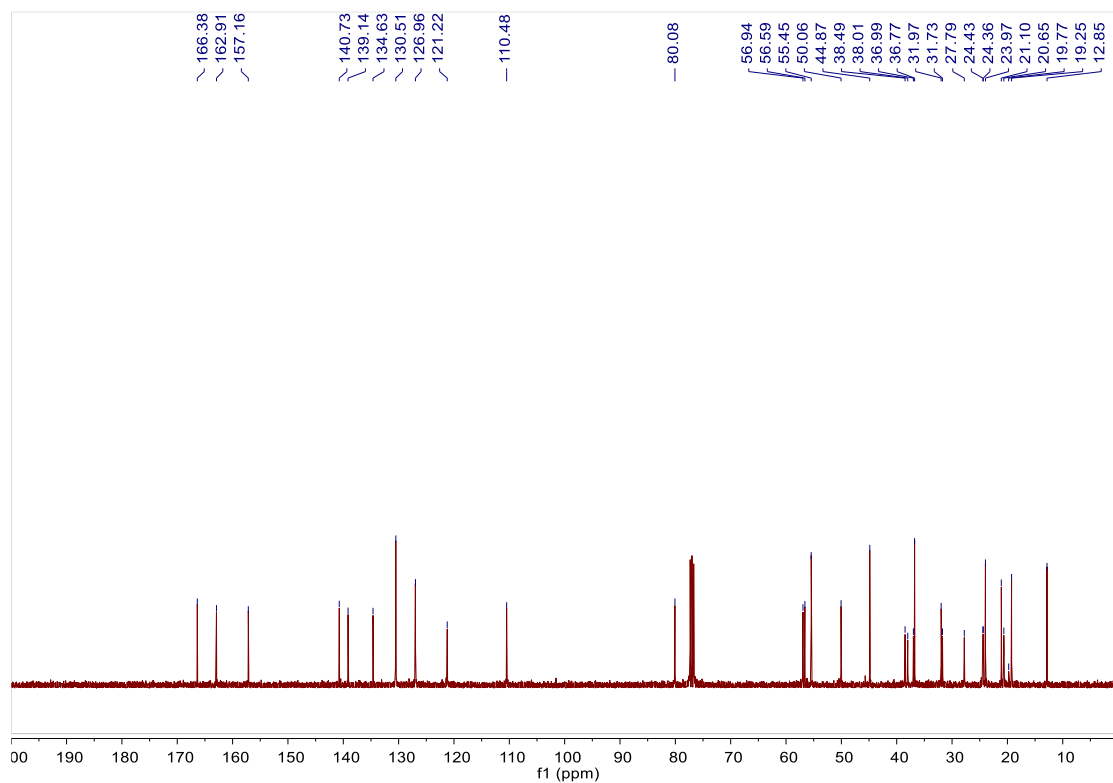

<sup>1</sup>H and <sup>13</sup>C NMR spectra for product 5 (CDCl<sub>3</sub>)



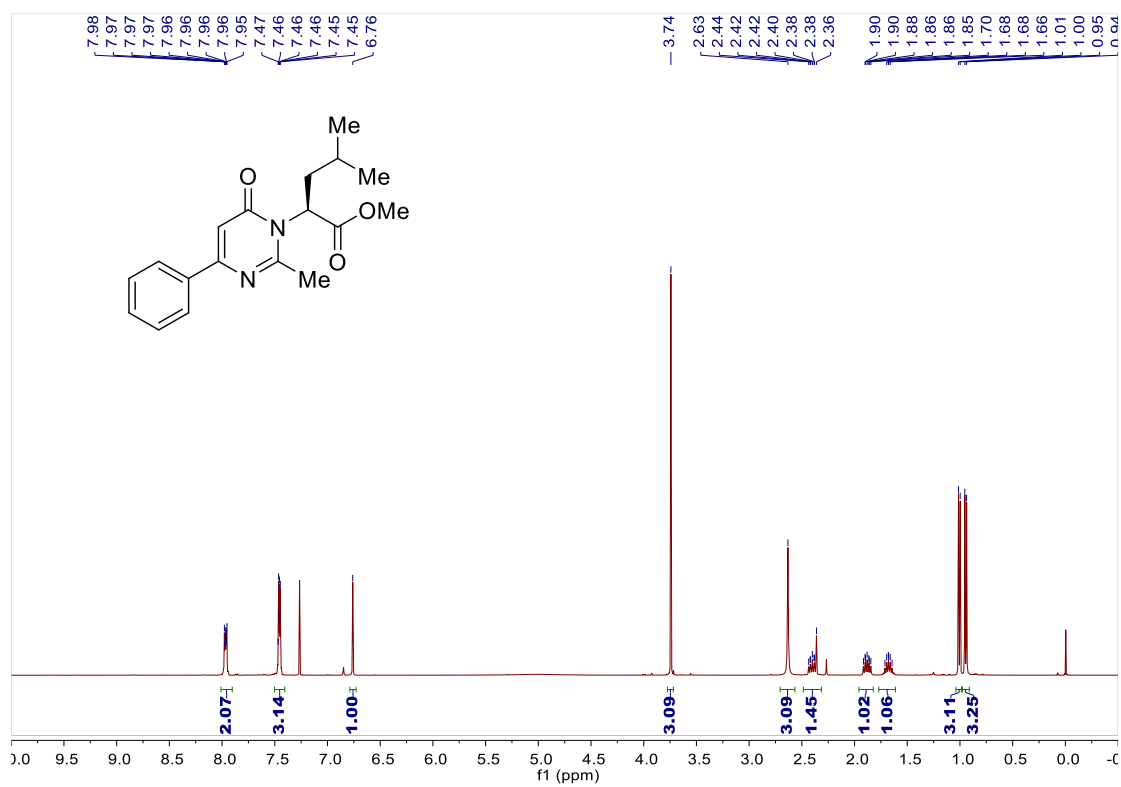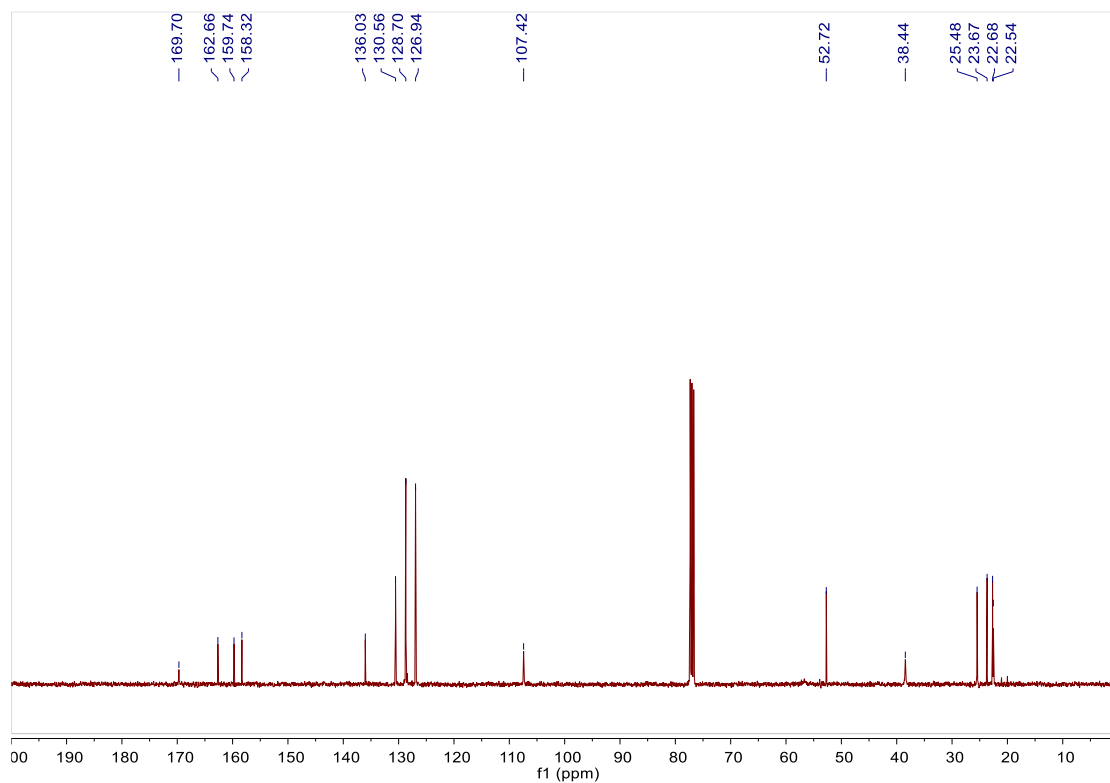

**<sup>1</sup>H and <sup>13</sup>C NMR spectra for product 9 (CDCl<sub>3</sub>)**
